# Supplementary material for: Energy Based True Definition of Cosmic Red Shift and Quantum Halt of the Current Universe Having Light Speed Rotation
Source: Preprints.org preprint supplement (doi:10.20944/preprints202303.0385.v3), 2023-07-25
Supplement: Supplementary file 1 [file supplementary]

**TRUE DEFINITION OF COSMIC RED SHIFT AND A REVIEW  
ON COSMIC EXPANSION BASED ON MICROSCOPIC PHYSICAL  
CONSTANTS AND TRUE RED SHIFT**

**U. V. S. Seshavatharam**

Honorary faculty, I-SERVE, Survey no-42, Hitech City  
Hyderabad-84, Telangana, India  
seshavatharam.uvs@gmail.com

**S. Lakshminarayana**

Department of Nuclear Physics, Andhra University  
Visakhapatnam-03, AP, India  
lnsrirama@gmail.com

Received April 29, 2023

Revised May 16, 2023

**Abstract**

Considering our recently proposed light speed expanding Hubble-Hawking Universe and considering the recent paper pertaining to cosmic halt authored by Cosmin Andrei, Anna Ijjas, and Paul J. Steinhardt and reviewed by Saul Perlmutter, in this paper we propose a very simple model of universe having early stage light speed expansion and current stage quantum halt accompanied by light speed rotation. Representing early cosmic expansion and rotation as an outward spiral, Hubble's law can be considered as a representation of current cosmic rotation having no further expansion. Proceeding further, we would like to emphasize the point that, traditional definition of cosmic red shift is absolutely wrong. Based on photon energy, true cosmic red shift must be defined as the ratio of change in wavelength to the observed wavelength of photon. Halting state of the current universe can be understood with a combined study of the gravitational potential energy of proton and electron separated by a distance of 0.84 fermi and half the product of reduced Planck's constant and current Hubble parameter.

**Keywords:** Planck ball; Quantum cosmology; Hubble-Hawking universe; Light speed expansion; Light speed rotation; Cosmic halt with quantum physics;

## 1. Introduction

It is very surprising to note that, after 20 years of a strong footing, based on 'quintessence' driven universe, within coming 100 million years, universe is coming to a halt and slowly getting contraction to form a big crunch [1]. This technical paper has been reviewed by one of the co-founders of the accelerating universe, Saul Perlmutter [2] and got published in the Proceedings of the National Academy of Sciences of USA in April 2022. It is certain that this paper will bring a radical change among mainstream cosmologists and engineers. As per the papers published in Astronomical Journal 2012 [3] and Nature-Scientific Reports 2016 [4], data pertaining to 580 to 740 super novae clearly reveal that, universe is expanding at an uniform rate. In 2018-2019, the same result has been obtained by a student Lisa Goh Wan Khee of National University of Singapore supervised by Cindy Ng [5]. This information can be considered as a base for current non-accelerating universe.

Mainstream cosmologists are strongly believing that, current expanding universe is having no center and no rotation [6]. Scientists who are strongly believing in cosmic rotation suggest that, current magnitude of cosmic angular velocity is very small in magnitude and is beyond the scope of observations [7,8,9]. Unfortunately, applications of cosmic angular velocity are also lagging in acquiring a strong foundation in constructing workable models of rotating cosmologies. In this context, we emphasize the following facts.

- 1) Quantum cosmology [10] point of view, in a theoretical approach, Spin or Rotation can be given a chance in developing quantum models of cosmology.
- 2) Current model of Lambda cosmology [11] is badly failing in incorporating quantum gravity concepts.
- 3) Very few cosmologists are working on quantum cosmology models.
- 4) Clearly speaking, no cosmologist is having a clear vision of quantum models of cosmology.

Keeping these points in view, we can confidently say that, models of cosmology without cosmic rotation cannot be considered as standard models

of cosmology. In support of this statement, we propose the following logical points.

- 1) Important point to be noted is that, to have rotation, universe should have a closed or positive curvature. Three most recent technical papers [12,13,14] published in three very high impact journals seem to support a closed universe. In this context, we would like to recall the views of Di Valentino, Melchiorri and Silk [12]. According their analysis and interpretation, observed enhanced lensing amplitude of cosmic microwave background radiation can be explained with a positive curvature of the universe at 99% confidence level. According to George Ellis and Julien Larena [13], the possibility that the universe might be positively curved, although it would not solve all the existing tensions at once, opens exciting theoretical possibilities for cosmology. Proceeding further, according to Will Handley [14] - In light of the inconsistency between Planck, CMB lensing and BAO data in the context of curved universes, cosmologists can no longer conclude that observations support a flat universe.
- 2) Hubble's observations [15] can also be studied with rotating and expanding models of cosmology. In a rotating frame, quantitatively Hubble's law resembles cosmic light speed rotation concept.
- 3) General theory of relativity is no way against to cosmic rotation [16]. In a non-accelerating universe, considering red shift as a measure of galactic distances and revolving speeds, references [3,4,5] can be considered as a supporting data for a rotating universe.
- 4) Without a radial in-flow of matter in all directions towards one specific point, one cannot expect a big crunch and without a big crunch, one cannot expect a big bang. Really if there was a "big bang" in the past, with reference to formation of big bang as predicted by GTR and with reference to the cosmic rate of expansion that might have taken place simultaneously in all directions at a "naturally selected rate" about the point of big bang: "point" of big bang can be considered as the characteristic reference point of cosmic expansion in all directions. Thinking in this way, either the point of big bang or baby Planck ball can be considered as a possible centre of cosmic evolution.

- 5) If observed universe is assumed to be associated with only one big bang, then 'point of big bang' can certainly be considered as the characteristic reference point of cosmic evolution in all directions.
- 6) If currently believed cosmic big bang is really a 'singularity', it seems more logical to depend on Planck scale rather than big bang. It may be noted that, in general, gravitational singularities are not clear about "Where, When and How" like essential points that are believed to be the basics of developing any workable physical model.
- 7) No model of cosmology is clear about the origin of cosmic thermal radiation. Even though big bang model is giving lot of information on cosmic thermal evolution, origin point of view, initial conditions are beyond the scope of big bang.
- 8) Both, Planck scale and big bang are being implemented simultaneously in understanding cosmic initial conditions leading to an ambiguous situation on whether to consider only big bang or only Planck scale.
- 9) Modern cosmological observations are providing strong evidences for the existence of mysterious rotational features of large cosmic filaments [17].
- 10) Current Hubble's constant can be considered as a limiting magnitude of current cosmic angular velocity. Similarly, light speed can be considered as a limiting magnitude of current cosmic rotation speed.
- 11) Current Hubble mass can be considered as a characteristic mass limit of current universe having a closed curvature.
- 12) So far, on large scale distances, physically,
  - a) No galaxy is confirmed to have super-luminal speeds.
  - b) No verification for actual galactic receding speeds.

## **2. Hubble-Hawking cosmology**

Based on light speed expansion, modified red shift formula, scaled Hawking's black hole temperature formula, super gravity of galactic baryon matter and baby Planck ball – in our recent publications, we have clearly established a novel model of quantum cosmology [18-28]. This paper is a modified version of our recent paper [28] and the key change is that, we consider current cosmic halt and light speed rotation in place of assumed

current light speed expansion. Here we would like to appeal that, a new model of cosmology, that follows Hubble's notion of expansion and Hawking's notion of black hole structure having thermal radiation can be called as Hubble–Hawking model of cosmology. We continue this section with the need of considering light speed expansion and rotation.

## 2.1 Need of considering light speed expansion and rotation

Technical publications that are having very high impact on science community are raising many new ideas and doubts on dark energy and dark matter. Now it is very clear that, there is a disagreement between main stream cosmologists and other researchers. Cosmological observations are not straight forward. For the same data, different interpretations are coming into picture with a great diversity. Right now it is not at all possible to prove the exact nature of cosmic expansion whether it is accelerating or decelerating. In this very ambiguous situation, it seems interesting to take the help of 'light speed' as a tool. There is a possibility for considering light speed radial expansion as well as light speed rotation. We would like to emphasize that,

- 1) All cosmological observations and physical studies & research are being accomplished with 'light speed' only.
- 2) So far no single experiment or no single observation confirmed super luminal physical results.
- 3) It is well confirmed that, gravitons are also moving with speed of light.
- 4) In one sentence, 'without light', there is no cosmology and there is no physics.

## 2.2 Present cosmic critical density, volume and mass

Currently believed cosmic critical density is,  $\rho_0 \cong (3H_0^2/8\pi G)$ . Considering the product of currently believed cosmic critical density and Hubble volume,  $V_0 \cong \left(\frac{4\pi}{3}\right)(c/H_0)^3$ , it is possible to show that,  $M_0 \cong (c^3/2GH_0)$ . On re-arranging this mass expression,  $2GM_0/c^2 \cong c/H_0 \cong R_0$ . It clearly indicates something new about the current universe in terms of current cosmic black hole mass, radius and expansion speed or rotation speed. We interpret this relation as, at present,  $R_0 \cong (c/H_0) \cong 2GM_0/c^2$ .

### 2.3 Present cosmic temperature

Currently believed cosmic temperature  $T_0$  seems to be equal to the geometric mean of Hawking temperature [29] of Planck mass,

$$T_{M_{pl}} \cong \frac{\hbar c^3}{8\pi k_B G M_{pl}}$$

and Hawking temperature of current cosmic Hubble mass,

$$T_{M_0} \cong \frac{\hbar c^3}{8\pi k_B G M_0} .$$

In a simplified form, it can be expressed as,

$$T_0 \cong \frac{\hbar c^3}{8\pi k_B G \sqrt{M_{pl} M_0}} .$$

It clearly indicates something new about the current cosmic temperature in terms of Hawking's Black hole physics. We interpret this relation as, with respect to Planck scale,

$$T_0 \cong \frac{\hbar c^3}{8\pi k_B G \sqrt{M_{pl} M_0}} \cong \frac{\hbar \sqrt{H_0 H_{pl}}}{4\pi k_B}$$

where  $M_0 \cong \frac{c^3}{2GH_0}$ ,  $M_{pl} \cong \sqrt{\frac{\hbar c}{G}}$  and  $H_{pl} \cong \frac{1}{2} \sqrt{\frac{c^5}{G\hbar}}$ .

For an observed value of  $T_0 \cong 2.72548$  K, estimated  $H_0 \cong 2.167867 \times 10^{-18} \text{ sec}^{-1} \cong 66.89 \text{ km/sec/Mpc}$ . We would like to emphasize the point that, based on Hawking's black hole temperature formula, geometric mean of Planck mass and the so called Hubble mass, seems to play a crucial role in estimating the observed cosmic microwave back ground temperature, (CMBR) [30]. This kind of relation is missing in Lambda cosmology and to a great extent, currently observed discrepancy or tension in estimating the Hubble parameter can be eliminated. Proceeding further currently believed Baryon acoustic bubble radius [31] can be fitted with a simple relation of the

$$\text{form, } (R_{BAO})_0 \cong \sqrt{\frac{T_0}{T_{\text{Recombination}}}} * \left(\frac{c}{H_0}\right) \cong \sqrt{\frac{2.725 \text{ K}}{3000 \text{ K}}} * \left(\frac{c}{H_0}\right) \cong \frac{c}{H^{1/4}_{\text{Recomb}} H_0^{3/4}} \cong 135 \text{ Mpc}.$$

Considering both Planck mass and the Universe as ‘point particles’, cosmic temperature relation can be derived with three hypothetical conditions,  $\frac{GM_0M_{pl}}{r_0^2} \cong \left(\frac{c^4}{8\pi G}\right)$ ;  $r_0 \cong \left(\frac{2.898 \times 10^{-3}}{2\pi T_0}\right)$  and  $M_0 \cong \left(\frac{c^3}{2GH_0}\right)$ . Derived relation is,

$$T_0 \cong \frac{\hbar c^3}{24.891 k_B G \sqrt{M_{pl} M_0}} \text{ and the denominator coefficient } 24.891 \text{ is close to } 8\pi \cong 25.13274.$$

## 2.4 Present galactic light travel distances

It may be noted that, by the time of defining the definition of galactic red shift, maximum red shift value was around 0.003. In this context, in terms of energy of photon, we would like to emphasize the point that, traditional definition of cosmic red shift is absolutely wrong. True cosmic red shift must be defined as - ratio of loss in energy of photon to the energy of photon at galaxy or lab. As a consequence, in terms of wavelength of photon, red shift can be defined as, the ratio of change in wavelength to the observed wavelength of photon. In a mathematical form,

$$z_{new} \cong \frac{E_{Lab} - E_{Observed}}{E_{Lab}} \cong \frac{\lambda_{Observed} - \lambda_{Lab}}{\lambda_{Observed}} \cong 1 - \frac{\lambda_{Lab}}{\lambda_{Observed}} \cong \frac{z}{z+1}. \text{ With reference to}$$

current definition,  $0 > z < \text{Infinity}$ . By following our new definition,  $0 > z_{new} < 1$ . It may be noted that, with our given definition, it is very easy to implement ‘light speed rotation’ in cosmic evolution scheme. Fig. 1 compares galactic light travel distances according to our new definition,  $d_G \cong (z_{new})(c/H_0)$  (Red curve) and the conventional formula connected with dark energy density and other density fractions (Green curve). For verification, readers are encouraged to visit the URLs, <http://www.atlasoftheuniverse.com/cosmodis.c> and <https://cosmocalc.icrar.org/>. Richard Powell has written an online C program (<http://www.atlasoftheuniverse.com/cosmodis.c>) (version 1.1) for estimating the light travel distance [32]. See Appendix A for the C++ program. Using that program and considering a redshift of  $z = (0.1 \text{ to } 200)$ , we have prepared Figure 1. Green curve indicates the light travel distance in Lambda cosmology prepared with Omega matter = 0.32, Omega lambda = 0.68, Omega radiation = 0.0 and  $H_0 = 66.87 \text{ km/sec/Mpc}$ . Figure 1 will certainly encourage any cosmologist to solve Einstein’s field equations with a closed curvature spreading at speed of light and rotating at speed of light. As traditional redshift is increasing from 0, error in estimated light travel distance is increasing to

+8.59% at  $z \cong 1.20$  and from there onwards, error is reaching to 0% at  $z \cong 11.5$  to 11.55. Proceeding further, error is reaching to -5.14% at  $z \cong 200.0$ . By considering  $z_{new}c$  as the revolving speed of galaxy (about cosmic axis if it exists), Hubble's law [15] can be expressed as,  $v_G \cong H_0 d_G$ .

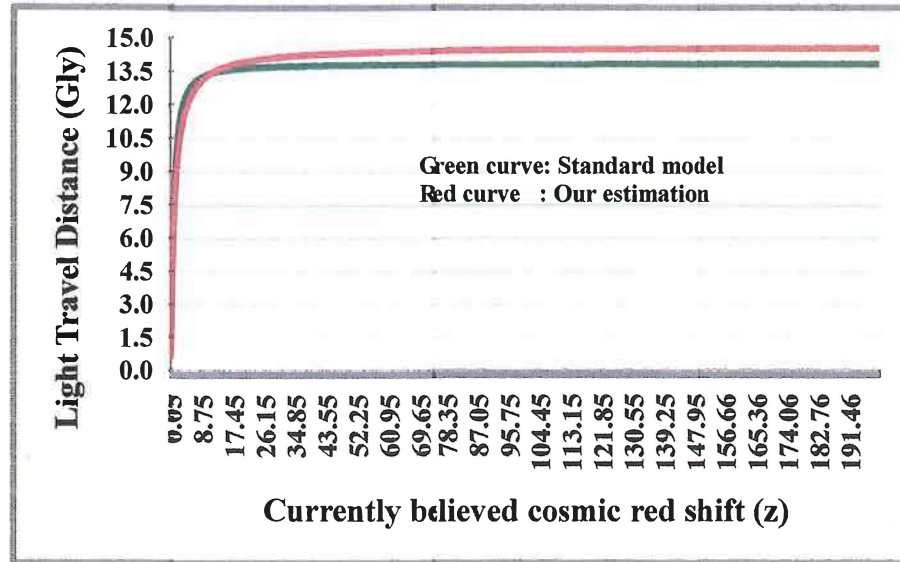

Figure 1. Comparison of standard and estimated light travel distances

### 3. Our 6 basic assumptions pertaining to cosmic structure and galactic structure

Based on the above points and logics proposed in sections (1) and (2),

- 1) We emphasize the point that, without a radial in-flow of matter in all directions towards any one specific point, it may not be possible to have a big crunch and discussing on center-less universe having a big bang or big bounce seems to be meaningless.
- 2) Considering the evolving universe as a growing black hole or simply a white hole [20,21], it seems natural to expect cosmic rotation.

In this section, considering the current Hubble's constant as an index of current cosmic angular velocity, we propose a simple model of light speed expanding and light speed rotating model of cosmology. It needs a review at fundamental level. Out of 6 assumptions, first four assumptions are associated with cosmic structure and expansion and the last two assumptions are associated with dark matter and galactic structure.

**Assumption-1:** At present, cosmic angular velocity is equal to the present Hubble constant. Mathematically, at present,

$$\begin{aligned} \omega_0 &\cong H_0 \text{ -----(1A)..Fitting with current data.} \\ \omega_t &\cong H_t \text{ -----(1B)..To be confirmed with further study for } (z+1) > 1100. \end{aligned} \quad (1)$$

**Assumption-2:** Universe is expanding like a black hole with initial light speed expansion and rotation and finally halted with light speed rotation. Mathematically, at present,

$$R_0 \cong \frac{2GM_0}{c^2} \cong \frac{c}{\omega_0} \quad (2)$$

**Assumption-3:** Universe is expanding like a black hole with a scaled Hawking's black hole temperature formula. Mathematically, it can be expressed as,

$$T_0 \cong \frac{\hbar c^3}{8\pi k_B G \sqrt{M_{pl} M_0}} \cong \frac{\hbar \sqrt{\omega_0 \omega_{pl}}}{4\pi k_B} \quad (3)$$

$$\text{where } M_0 \cong \frac{c^3}{2G\omega_0}, \quad M_{pl} \cong \sqrt{\frac{\hbar c}{G}} \quad \text{and} \quad \omega_{pl} \cong \frac{1}{2} \sqrt{\frac{c^5}{G\hbar}}.$$

It may be noted that, this assumption certainly helps in eliminating the tension in estimating the magnitude of Hubble parameter.

**Assumption-4:** Following light speed rotation, at present cosmic expansion is coming to a halt. Considering proton and electron rest masses, in a quantum mechanical approach it can be understood as,

- 166 -

$$\frac{Gm_p m_e}{R_p \omega_0} \cong \frac{\hbar}{2} \quad (4)$$

where  $R_p \cong (0.84184 \text{ to } 0.87680) \text{ fm}$  is the root mean square radius of proton [33].

**Assumption-5:** There exists no dark matter [34-38] and when baryon mass of any galaxy crosses (180 to 200) million solar masses, galaxy 'as a whole' experiences super gravity [22,26] in such a way that its effective or total mass can be expressed as,

$$\begin{aligned} (M_{Total})_G &\cong \left\{ (M_{baryon})_G + \left[ \frac{(M_{baryon})_G^{3/2}}{\sqrt{(M_{limit})_0}} \right] \right\} \dots (\text{without dark matter}) \\ &\cong \left\{ (M_{baryon})_G + (M_{dark})_G \right\} \dots (\text{if there exists dark matter}) \end{aligned} \quad (5)$$

$$\text{where, } \begin{cases} (M_{limit})_0 \cong \text{Current mass limit of ordinary gravity} \\ \quad \quad \quad = 180 \text{ to } 200 \text{ solar masses} \cong (3.6 \text{ to } 4.0) \times 10^{38} \text{ kg.} \\ (M_{baryon})_G = \text{Galactic baryon mass.} \\ (M_{dark})_G = \text{Galactic dark mass.} \\ (M_{Total})_G = \text{Total mass of Galaxy.} \end{cases}$$

Starting from the recombination period, for  $(M_{limit})_0$ , its current cosmological mass expression can be expressed as,

$$\frac{M_0}{(M_{limit})_0} \cong \exp\left(\sqrt{\frac{T_{Recomb}}{T_0}}\right)$$

$$\text{where } M_0 \cong \frac{c^3}{2G\omega_0} \text{ and } \frac{T_{Recomb}}{T_0} \cong \frac{\text{Recombination temperature}}{\text{Current cosmic temperature}} \cong \frac{3000 \text{ K}}{2.725 \text{ K}}.$$

**Assumption-6:** Current cosmic mass plays a vital role in understanding the observed galactic flat rotation speeds in such a way that,

$$\frac{V_G}{c} \approx \frac{1}{4} \left[ \frac{(M_{Total})_G}{M_0} \right]^{1/4} \quad (6)$$

$$V_G \approx 0.2973 \left[ G(M_{Total})_G (c\omega_0) \right]^{1/4} \quad (7)$$

It may be noted that, this relation is very similar to the famous MOND's formula [33]. Interesting point to be noted is that  $(c\omega_0)$  can be considered as the upper limit of current cosmic acceleration. In addition to that, MOND's concept of weak gravity can be studied in terms of Mach's view on the universal role of cosmic distance back ground [39]. See Fig. 2 for the estimated galactic flat rotation speeds.

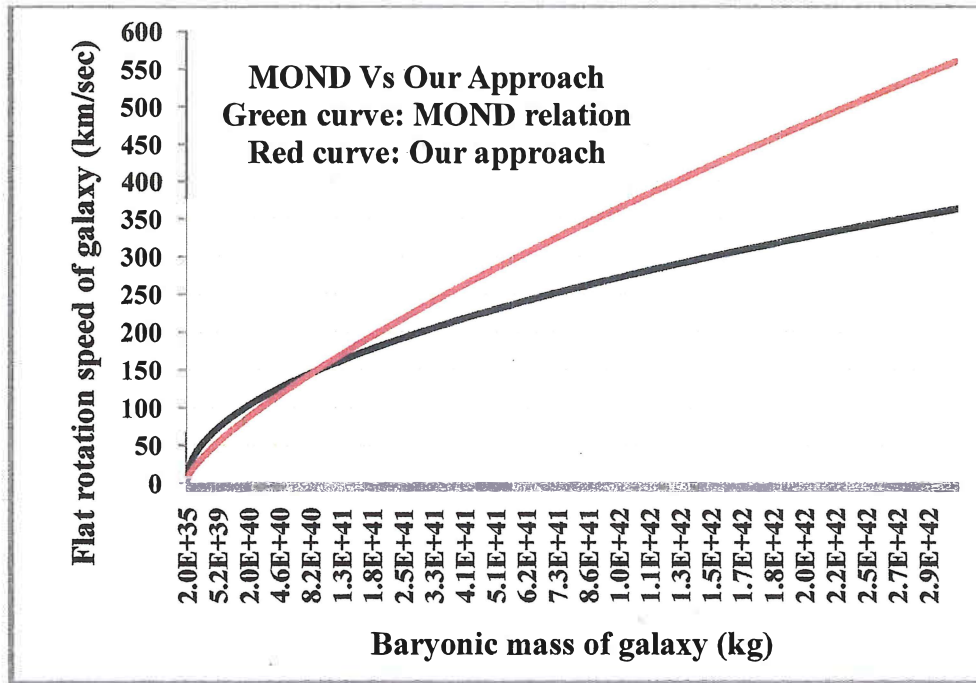

Figure 2: Galactic flat rotation speeds

Flat rotation speeds from 10 km/sec to 500km/sec can be understood in this way. Our proposal is in line with newly discovered dark matter deficient galaxies [40] and large massive galaxies having high flat rotation speeds [41]. Another interesting feature is that, Sun's estimated equivalent dark mass is

around  $1.5 \times 10^{26}$  kg and its effect seems to be negligible. It needs observational and experimental confirmation. To some extent, considering the estimated Virial mass of Sun and based on the theory of light bending, our proposal can be confirmed. Nucleons estimated equivalent dark mass is around  $10^{-60}$  kg and it needs experimental verification.

#### **4. Discussion on present cosmic rotation**

Historically, Godel, Gamow, Whittaker, Hawking, Narlikar, Nodland, Ralston, Rubin, Birch, Korotky, Obukhov, Chechin, Sivaram, Magueijo and Longo like many cosmologists expressed their positive opinion on cosmic rotation [7-9],[42-47]. Recent observations on cosmic anisotropy [48] and galactic spin directions seem to support the possible existence of cosmic rotation [49]. Most recent references [12,13,14] seem to shed light on the necessity of considering cosmic positive curvature which is a major prerequisite for cosmic rotation. Even though cosmological principle [50,51] is having 100 years of strong footing, at present, it is being suspected and examined in many directions seriously. It may also be noted that, the argument that the Universe does not rotate is not based on observational evidence, but is merely an assumption that became popular.

It may be noted that, by considering 'light speed rotation' and ignoring 'light speed expansion', Einstein's static universe can be made stable dynamically. There seems no need to introduce the 'Lambda term'. Against the strongly believed current cosmic acceleration [2], if current universe is having a trend of deceleration as proposed by Paul J. Steinhardt et al and reviewed by Perlmutter S. [1] – by considering light speed rotation throughout the cosmic history- there is a scope for developing light speed rotating and decelerating models of cosmology [18]. We are working on understanding and validating the dual role of light speed in cosmic expansion and rotation. With ongoing observations, whether it is cosmic light speed expansion or light speed rotation - can be explored in all possible ways.

#### **5. Discussion on present cosmic halt**

Based on ref. [1], it seems very clear to say that, dark energy is taking a new turn and making the universe to decelerate and within 100 million years, universe is coming to a halt. Here it is very important to note that, so far no

single observation or no single experiment has shown a signal for the existence of dark energy. Cosmologists are somehow making attempts to understand the expanding nature of current universe in terms of dark energy for acceleration as well as deceleration. If it is really true that, in near future, universe is going to a halt, based on assumptions (1) to (4), it can be understood in terms of unification of atomic and cosmic physical constants [52-56]. Relation (4) can be re-written as,

$$\frac{Gm_p m_e}{R_p} \cong \frac{1}{2} \hbar \omega_0 \quad \text{--- (8A)}$$

$$\frac{2Gm_p m_e}{\hbar R_p} \cong \omega_0 \cong (67.88 \text{ to } 70.69) \text{ km/sec/Mpc} \quad \text{--- (8B)} \quad (8)$$

where  $R_p \cong (0.84184 \text{ to } 0.87680) \text{ fm}$

Here in this expression, LHS is a representation of gravitational potential energy of proton and electron separated by a distance equal to the root mean square radius of proton. RHS seems to be a representation of ground state quantum of energy associated with cosmic angular velocity and characteristic quantum constant.

Following relation (4), quantum of orbiting electron's areal velocity can be expressed as,

$$\frac{dA}{dt} \cong \frac{1}{2} v r \cong \frac{Gm_p}{R_p \omega_0} \quad (9)$$

Based on our 4G model of unification [57-60], we noticed that [61],

$$R_p \cong \sqrt{\frac{\alpha_s}{\alpha}} \left( \frac{\hbar}{m_p c} \right) \cong \sqrt{\frac{0.115 \text{ to } 0.12}{0.0073}} \left( \frac{\hbar}{m_p c} \right) \cong (4 \mp 0.05) \left( \frac{\hbar}{m_p c} \right) \cong 4 \left( \frac{\hbar}{m_p c} \right) \quad (10)$$

where  $\alpha_s$  is the strong coupling constant and  $\alpha$  is the fine structure ratio. Hence, it is also possible to write another two relations in the following way.

$$\sqrt{\frac{Gm_p^2 m_e c}{2\omega_0}} \cong \hbar \text{---(11A)} \tag{11}$$

$$\frac{Gm_p^2 m_e c}{2\hbar^2} \cong \omega_0 \cong 70.75 \text{ km/sec/Mpc---(11B)}$$

Another very interesting relation is associated with fine structure ratio. For  $\omega_0 \cong H_0 \cong 76.266 \text{ km/sec/Mpc}$ ,

$$\frac{1}{\alpha} \cong \ln \sqrt{\frac{(E_T)_0/2}{(E_{em})_0}} \cong \ln \sqrt{\frac{4\pi\epsilon_0 c^6}{23040\pi G\omega_0^2 e^2}} \cong 137.036 \tag{12}$$

where

$$(E_T)_0 \cong aT_0^4 \left( \frac{4\pi}{3} \left( \frac{c}{\omega_0} \right)^3 \right) \cong \text{Current thermal energy within the current Hubble volume.}$$

$$(E_T)_0 / 2 \cong \text{Half of } aT_0^4 \left( \frac{4\pi}{3} \left( \frac{c}{\omega_0} \right)^3 \right)$$

$\cong$  Current thermal energy within the current hemi spherical or dipole Hubble volume.

$$(E_{em})_0 \cong \frac{e^2}{4\pi\epsilon_0 (c/\omega_0)} \cong \text{Electromagnetic potential associated with current Hubble radius.}$$

Readers are encouraged to refer the URL for various values of the current Hubble parameter estimated with various methods: [https://en.wikipedia.org/wiki/Hubble%27s\\_law](https://en.wikipedia.org/wiki/Hubble%27s_law). From the data it is clear that,  $H_0 \cong (67.6 \text{ to } 76.2) \text{ km/sec/Mpc}$ . Relation (12) seems to give a nice picture of the current cosmic closed or positive curvature and it needs a very special study at fundamental level.

## 6. General discussion on quantum cosmology

Quantum cosmology point of view, our assumptions are very clear and seem to incorporate Planck scale in current cosmic observations. Our assumptions (1) to (4) are giving a very nice explanation for the origin of current cosmic temperature and its observed isotropy on large scales. Proceeding further,

halting of the universe with atomic, nuclear and quantum physical constants seem to open a new branch of cosmology associated with microscopic physics. We are working on finding other such relations. It is well believed that, Hawking's findings about black holes and the universe [62] are the most important contributions to physics in recent decades. Proposed Hawking's scaled black hole temperature formula can be given a chance in understanding and refining the views of Hawking's multi universal paradigm.

### 1. General discussion on Hubble's law in view of cosmic rotation

Following section (2.4), if one is willing to consider cosmic red shift definition as,

$$z_{new} \cong \frac{\lambda_{Observed} - \lambda_{Lab}}{\lambda_{Observed}} \cong 1 - \frac{\lambda_{Lab}}{\lambda_{Observed}} \cong \frac{z}{z+1} \quad (13)$$

It will certainly help in understanding and resolving the issues connected with cosmic acceleration and dark energy. Based on this new definition of cosmic red shift, observed farthest galaxies distance can be estimated very easily. For example, see the following Table 1. We sincerely appeal that, on cosmological scales, 2.5% is not yet all a 'serious' error. We would like to emphasize the point that, conceptually, we are no way deviating from the basic idea of cosmic expansion. Only thing is that, we are confining to 'initial light speed expansion and rotation' and 'present light speed rotation with no further expansion'. Whether current/future universe is expanding or not can be understood with,

- a) Rate of decrease in cosmic temperature.
- b) Rate of decrease in Hubble parameter.

Based on the data presented in Tab. 1 Hubble's law for cosmic rotation applicable to whole Hubble volume can be expressed as,

$$d_G \omega_0 \cong \left( \frac{z}{z+1} \right) c \cong (z_{new}) c \quad (14)$$

Cosmic scale factor seems to be associated with time and temperature rather than red shift. Scale factor can be expressed as,

$$1+z \cong \sqrt{\exp(\gamma_0 - \gamma_t)} \cong \frac{T_t}{T_0} \quad (15)$$

$$\text{where } \gamma_0 \cong 1 + \ln\left(\frac{\omega_{pl}}{\omega_0}\right) \text{ and } \gamma_t \cong 1 + \ln\left(\frac{\omega_{pl}}{\omega_t}\right)$$

$T_t, T_0 \cong$  Past and current cosmic temperatures.

**Table-1: To estimate and fit the distances of farthest galaxies**

| Galaxy        | Redshift | Standard Light travel distance (Gly) | Estimated Light travel distance (Gly) | %Error |
|---------------|----------|--------------------------------------|---------------------------------------|--------|
| GN-z11        | 11.09    | 13.39                                | 13.41                                 | -0.15  |
| MACS1149-JD1  | 9.11     | 13.26                                | 13.17                                 | 0.65   |
| EGSY8p7       | 8.68     | 13.23                                | 13.11                                 | 0.91   |
| A2744 YD4     | 8.38     | 13.2                                 | 13.06                                 | 1.05   |
| EGS-zs8-1     | 7.73     | 13.13                                | 12.95                                 | 1.41   |
| z7 GSD 3811   | 7.66     | 13.11                                | 12.93                                 | 1.36   |
| z8 GND 5296   | 7.51     | 13.1                                 | 12.9                                  | 1.51   |
| SXDF-NB1006-2 | 7.215    | 13.17                                | 12.84                                 | 2.5    |
| GN-108036     | 7.213    | 13.07                                | 12.84                                 | 2.5    |
| BDF-3299      | 7.109    | 13.05                                | 12.84                                 | 2.5    |
| A1703 zD6     | 7.014    | 13.04                                | 12.84                                 | 2.5    |
| BDF-521       | 7.008    | 13.04                                | 12.84                                 | 2.5    |
| G2-1408       | 6.972    | 13.03                                | 12.84                                 | 2.5    |
| IOK-1         | 6.964    | 13.03                                | 12.84                                 | 2.5    |

Following our approach, currently believed cosmic time scale up to  $1+z = 1100$  can be expressed as,

$$t\omega_t \cong \sqrt{1+z} \quad (16)$$

It is an accurate fit and needs a careful review for its strange matching. We are working in this direction. If so,

$$t \cong \left(\frac{1}{1+z}\right)^{\frac{3}{2}} \left(\frac{1}{H_0}\right) \cong \left(\frac{1}{1+z}\right)^{\frac{3}{2}} \left(\frac{1}{\omega_0}\right) \cong \frac{\sqrt{1+z}}{\omega_t} \cong \frac{[\exp(\gamma_0 - \gamma_t)]^{\frac{1}{4}}}{\omega_t} \quad (17)$$

$$\text{where } \omega_t \cong \left(\frac{1}{\omega_{pl}}\right) \left(\frac{4\pi k_B T_t}{\hbar}\right)^2 \cong 2\sqrt{\frac{G\hbar}{c^5}} \left(\frac{4\pi k_B T_t}{\hbar}\right)^2.$$

Interesting observation to be noted is that,

$$\frac{\omega_t}{\omega_0} \cong \exp(\gamma_0 - \gamma_t) \cong (1+z)^2 \quad (18)$$

### 8. Estimation of distances associated with galactic flat rotation speeds

Following assumptions (5) and (6), we suggest the following points for further study and observation.

- 1) Galactic total mass can be considered as the sum of galactic baryonic mass and dark mass.
- 2) As galactic total mass increases, galactic flat rotation speed as well as the distance associated with flat rotation speed increases.
- 3) Galactic core radius seems to depend on galactic baryon mass, current cosmic Hubble mass and the ratio of galactic baryon mass to total mass.
- 4) Galactic flat rotation distance seems to depend on galactic total mass, current cosmic Hubble mass and the ratio of galactic baryon mass to total mass.

Based on these points, we noticed a very simple relation for galactic flat rotation distances. It can be expressed as,

$$\begin{aligned} r_f &\cong \frac{2G\sqrt{(M_{baryon})_G M_0}}{c^2} \\ &\cong \sqrt{\left(\frac{2G(M_{baryon})_G}{c^2}\right)\left(\frac{c}{\omega_0}\right)} \cong \sqrt{\frac{2G(M_{baryon})_G}{c\omega_0}} \end{aligned} \quad (19)$$

$$\text{where } \begin{cases} r_f = \text{Distance from galactic center associated with flat rotation speed.} \\ M_0 \cong \frac{c^3}{2G\omega_0} = \text{Current cosmic Hubble mass.} \end{cases}$$

Galactic core radius can be expressed as,

$$r_c \cong \sqrt{\frac{M_0}{(M_{Total})_G} \left( \frac{2G(M_{baryon})_G}{c^2} \right)} \quad (20)$$

Based on relations (19) and (20),

$$\begin{aligned} \frac{r_f}{r_c} &\cong \frac{\text{Distance from galactic center associated with flat rotation speed}}{\text{Galactic core radius}} \\ &\cong \sqrt{\frac{(M_{Total})_G}{(M_{baryon})_G}} \cong \sqrt{1 + \frac{(M_{dark})_G}{(M_{baryon})_G}} \end{aligned} \quad (21)$$

Interesting point to be noted is that, by knowing the galactic flat rotation speed and flat rotation distance, galactic baryon mass, galactic total mass and hence galactic dark mass can be estimated in a unified approach. This is for observational test. Galactic whole radius can be expressed as,

$$R_G \cong \frac{G(M_{Total})_G}{V_G^2} \cong \left( \frac{16G\sqrt{(M_{Total})_G M_0}}{c^2} \right) \cong \sqrt{\frac{128G(M_{Total})_G}{c\omega_0}} \quad (22)$$

It may be noted that, based on relations (19) to (22), galactic masses, flat rotation speeds and corresponding distances can be studied in a unified approach. Estimated baryon and dark masses can be compared with existing methods. Advantage of our approach is that, current cosmic Hubble mass can be considered as a key tool in exploring the structural secrets of galaxies.

See Tab. 2 for galactic masses, flat rotation speeds and working radii. See Fig. 3 for estimated galactic flat rotation distances. Galactic rotation curves for  $r \geq r_c$  can be approximated with the following relations. It needs a fine tuning based on the actual curve [63].

**Table 2. Galactic masses, flat rotation speeds and working radii**

| Assumed baryon mass<br>$M_{\odot}$ | Estimated dark mass<br>$M_{\odot}$ | Estimated total mass<br>$M_{\odot}$ | Estimated flat rotation speed<br>(km/sec) | Estimated core radius<br>(kpc) | Estimated flat rotation distance<br>(kpc) | Estimated whole radius<br>(kpc) |
|------------------------------------|------------------------------------|-------------------------------------|-------------------------------------------|--------------------------------|-------------------------------------------|---------------------------------|
| 5.03E+05                           | 2.51E+04                           | 5.28E+05                            | 4.34                                      | 0.014                          | 0.015                                     | 0.120                           |
| 7.54E+05                           | 4.62E+04                           | 8.00E+05                            | 4.82                                      | 0.017                          | 0.018                                     | 0.148                           |
| 1.13E+06                           | 8.48E+04                           | 1.22E+06                            | 5.35                                      | 0.021                          | 0.022                                     | 0.183                           |
| 1.70E+06                           | 1.56E+05                           | 1.85E+06                            | 5.95                                      | 0.026                          | 0.027                                     | 0.225                           |
| 2.55E+06                           | 2.86E+05                           | 2.83E+06                            | 6.61                                      | 0.031                          | 0.033                                     | 0.279                           |
| 3.82E+06                           | 5.26E+05                           | 4.34E+06                            | 7.36                                      | 0.038                          | 0.040                                     | 0.345                           |
| 5.73E+06                           | 9.66E+05                           | 6.69E+06                            | 8.20                                      | 0.046                          | 0.049                                     | 0.428                           |
| 8.59E+06                           | 1.78E+06                           | 1.04E+07                            | 9.15                                      | 0.055                          | 0.061                                     | 0.533                           |
| 1.29E+07                           | 3.26E+06                           | 1.61E+07                            | 10.22                                     | 0.066                          | 0.074                                     | 0.665                           |
| 1.93E+07                           | 5.99E+06                           | 2.53E+07                            | 11.43                                     | 0.079                          | 0.091                                     | 0.833                           |
| 2.90E+07                           | 1.10E+07                           | 4.00E+07                            | 12.82                                     | 0.095                          | 0.111                                     | 1.047                           |
| 4.35E+07                           | 2.02E+07                           | 6.37E+07                            | 14.40                                     | 0.113                          | 0.136                                     | 1.321                           |
| 6.52E+07                           | 3.72E+07                           | 1.02E+08                            | 16.21                                     | 0.133                          | 0.167                                     | 1.675                           |
| 9.78E+07                           | 6.83E+07                           | 1.66E+08                            | 18.30                                     | 0.157                          | 0.204                                     | 2.134                           |
| 1.47E+08                           | 1.25E+08                           | 2.72E+08                            | 20.70                                     | 0.184                          | 0.250                                     | 2.731                           |
| 2.20E+08                           | 2.30E+08                           | 4.51E+08                            | 23.48                                     | 0.214                          | 0.307                                     | 3.514                           |
| 3.30E+08                           | 4.23E+08                           | 7.53E+08                            | 26.71                                     | 0.249                          | 0.376                                     | 4.544                           |
| 4.95E+08                           | 7.77E+08                           | 1.27E+09                            | 30.45                                     | 0.287                          | 0.460                                     | 5.906                           |
| 7.43E+08                           | 1.43E+09                           | 2.17E+09                            | 34.80                                     | 0.330                          | 0.563                                     | 7.714                           |
| 1.11E+09                           | 2.62E+09                           | 3.74E+09                            | 39.86                                     | 0.377                          | 0.690                                     | 10.122                          |
| 1.67E+09                           | 4.82E+09                           | 6.49E+09                            | 45.76                                     | 0.429                          | 0.845                                     | 13.339                          |
| 2.51E+09                           | 8.86E+09                           | 1.14E+10                            | 52.63                                     | 0.486                          | 1.035                                     | 17.647                          |
| 3.76E+09                           | 1.63E+10                           | 2.00E+10                            | 60.64                                     | 0.549                          | 1.268                                     | 23.430                          |
| 5.64E+09                           | 2.99E+10                           | 3.55E+10                            | 69.98                                     | 0.619                          | 1.553                                     | 31.205                          |
| 8.46E+09                           | 5.49E+10                           | 6.34E+10                            | 80.88                                     | 0.695                          | 1.902                                     | 41.674                          |
| 1.27E+10                           | 1.01E+11                           | 1.14E+11                            | 93.57                                     | 0.779                          | 2.329                                     | 55.789                          |
| 1.90E+10                           | 1.85E+11                           | 2.04E+11                            | 108.38                                    | 0.871                          | 2.852                                     | 74.837                          |
| 2.86E+10                           | 3.40E+11                           | 3.69E+11                            | 125.63                                    | 0.972                          | 3.493                                     | 100.564                         |
| 4.28E+10                           | 6.25E+11                           | 6.68E+11                            | 145.74                                    | 1.083                          | 4.279                                     | 135.333                         |
| 6.43E+10                           | 1.15E+12                           | 1.21E+12                            | 169.17                                    | 1.206                          | 5.240                                     | 182.348                         |
| 9.64E+10                           | 2.11E+12                           | 2.21E+12                            | 196.48                                    | 1.341                          | 6.418                                     | 245.951                         |
| 1.45E+11                           | 3.88E+12                           | 4.02E+12                            | 228.28                                    | 1.490                          | 7.860                                     | 332.024                         |
| 2.17E+11                           | 7.12E+12                           | 7.34E+12                            | 265.33                                    | 1.655                          | 9.627                                     | 448.539                         |
| 3.25E+11                           | 1.31E+13                           | 1.34E+13                            | 308.48                                    | 1.836                          | 11.790                                    | 606.300                         |
| 4.88E+11                           | 2.40E+13                           | 2.45E+13                            | 358.74                                    | 2.037                          | 14.440                                    | 819.950                         |
| 7.32E+11                           | 4.42E+13                           | 4.49E+13                            | 417.27                                    | 2.258                          | 17.685                                    | 1109.333                        |
| 1.10E+12                           | 8.11E+13                           | 8.22E+13                            | 485.43                                    | 2.503                          | 21.660                                    | 1501.342                        |
| 1.65E+12                           | 1.49E+14                           | 1.51E+14                            | 564.80                                    | 2.773                          | 26.528                                    | 2032.429                        |
| 2.47E+12                           | 2.74E+14                           | 2.76E+14                            | 657.21                                    | 3.072                          | 32.490                                    | 2751.996                        |

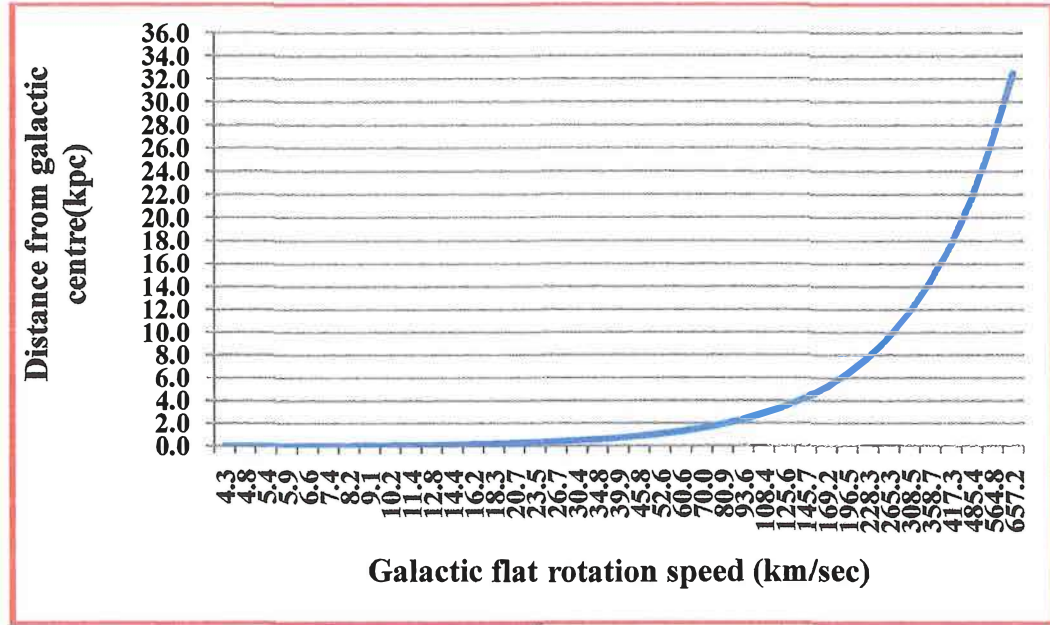

Based on relation (23), in terms of galactic core radius and flat rotation distance, galactic rotation curve can be re-expressed as,

$$\left. \begin{aligned} V_r &\cong \frac{1}{3} \left[ 1 + \ln\left(\frac{r}{r_c}\right) + \ln\left(\frac{r_f}{r_c}\right) \right] \left[ \frac{G(M_{Total})_G V_{Ref}^2}{r} \right]^{\frac{1}{4}} \text{-----(24A)} \\ V_r &\cong \frac{1}{3} \left[ 1 + \ln\left(\frac{r}{r_c}\right) + \frac{2}{3} \ln\left(\frac{r_f}{r_c}\right) \right] \left[ \frac{G(M_{Total})_G V_{Ref}^2}{r} \right]^{\frac{1}{4}} \text{-----(24B)} \end{aligned} \right\} \quad (24)$$

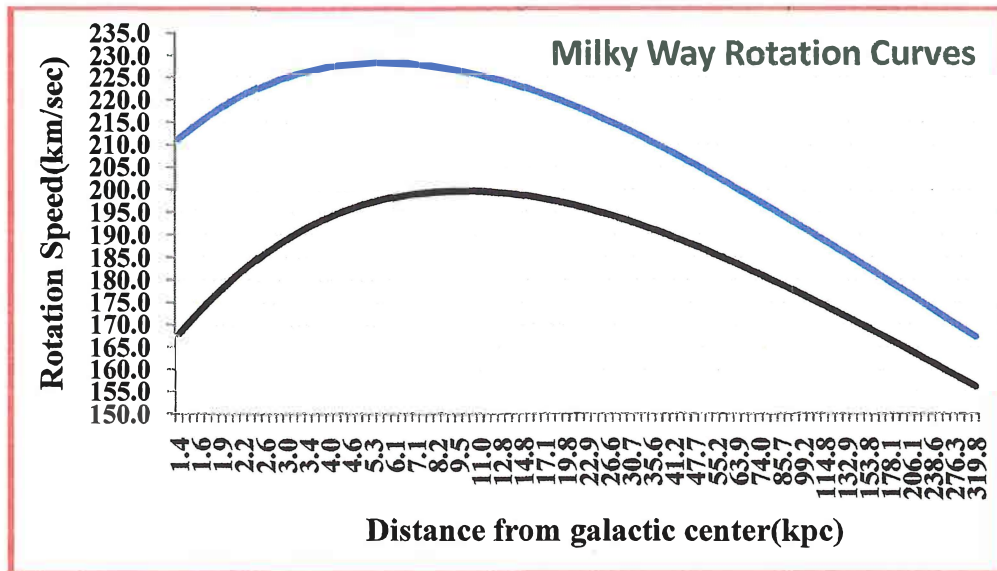

Figure 4: Estimated Milky Way Rotation Curves

Considering relations (19) and (20) and by knowing the galactic flat rotation speeds, galactic total masses and galactic radii can be estimated without the need of currently believed 'dark matter halo' concepts and their complicated analytical procedures.

Based on relations (19) to (24), one can understand the potential applications of current cosmic angular velocity or rotation speed in exploring the constructional secrets of galaxies. It needs further study.

It may be noted that, considering a rotating and expanding model of cosmology, it seems possible to say that,

- 1) Galaxies seem to follow an outward spiral path.
- 2) Galaxies can be seemed to be arranged in a systematic order.
- 3) Even though present universe is believed to be accelerating, as current expansion rate is very small, increase in separation distance between neighboring galaxies seems to be negligible. Hence, distance between neighboring galaxies seems to be approximately fixed.

Based on the new red shift definition as discussed in section (7), various distances associated with galactic light can be understood in the following way.

Light Travel Distance can be approximated with,

$$LTD \cong z_{new} \left( \frac{c}{\omega_0} \right) \quad (25)$$

Comoving Distance can be approximated with,

$$CD \cong \exp(z_{new}) * LTD \quad (26)$$

Hence, Hubble's law for galactic comoving distances can be expressed as,

$$CD_{gal} \cong z_{new} \exp(z_{new}) * \left( \frac{c}{\omega_0} \right) \text{ where } z_{new} \leq 1 \quad (27)$$

For Lambda model of cosmology, corresponding receding speed of a galaxy can be expressed as,  $V_{gal} \cong [z_{new} \exp(z_{new})]c \cong \left[ \left( \frac{z}{1+z} \right) \exp\left( \frac{z}{1+z} \right) \right]c$

For  $z_{new} \cong 1$ ,  $CD_{gal} \cong \exp(1) * \left( \frac{c}{\omega_0} \right) \cong 2.7183 \left( \frac{c}{\omega_0} \right) \cong 39.74 \text{ Gly.}$

It may be noted that, according to Lambda model of cosmology, radius of observable universe is around 45 Gly.

Luminosity Distance can be approximated with,

$$LD \cong \frac{CD}{1 - z_{new}} \cong \left( \frac{z_{new} \exp(z_{new})}{1 - z_{new}} \right) \left( \frac{c}{\omega_0} \right) \quad (28)$$

See Fig. 5 and Table 3. See Appendix A for the C++ program.

### Column Details of Table 3

Column-1: Red shift

Column-2: Modified Red shift

Column-3: Light travel distance as per Lambda Cosmology (Gly)

Column-4: Light travel distance in Hubble-Hawking Cosmology (Gly)

Column-5: % error in Light travel distance (Blue curve in the graph)

Column-6: Comoving distance as per Lambda Cosmology (Gly)

Column-7: Comoving distance in Hubble-Hawking Cosmology (Gly)

Column-8: % error in Comoving distance (Red curve in the graph)

Column-9: Luminosity distance as per Lambda Cosmology (Gly)

Column-10: Luminosity distance in Hubble-Hawking Cosmology (Gly)

Column-11: % error in Luminosity distance (Red curve in the graph)

Note-1: LC = Lambda cosmology and HHC = Hubble-Hawking cosmology

Note-2: Numerically, columns 8 and 11 are almost same.

**Data values:**  $H_0 = 66.89$  km/sec/Mpc;

Matter density %= 0.32%;

Dark energy density %= 0.68%

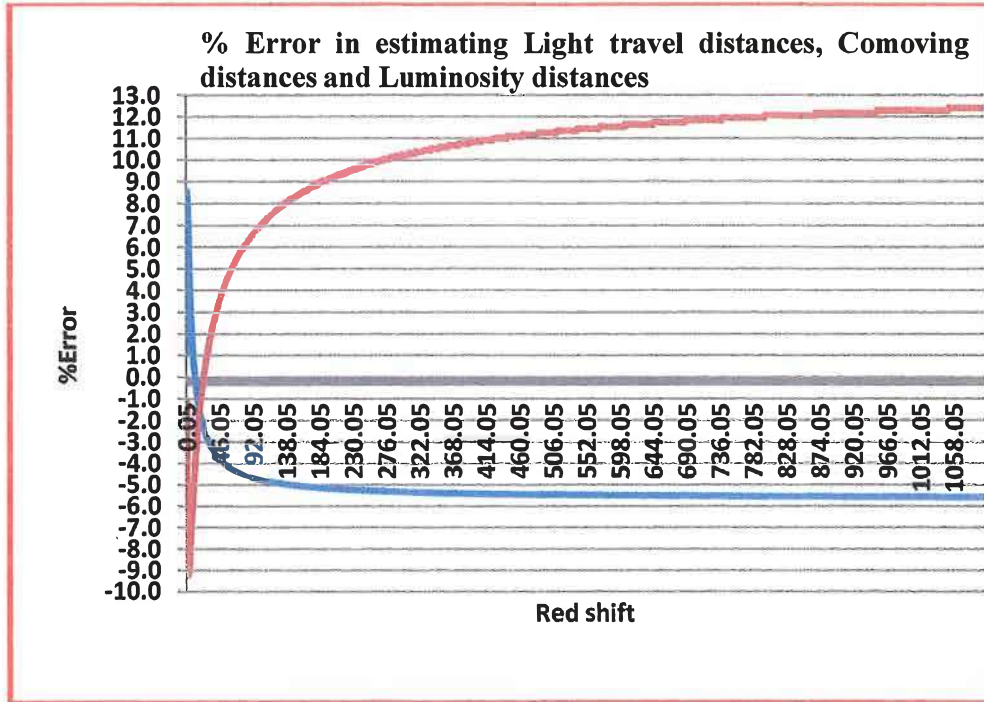

**Figure 5: Comparative study of various cosmological distances**

**Table 3: Various cosmological distances estimated with true cosmic red shift**

| Z     | $z/(1+z)$ | LTD LC | LTD HHC | %Error | CD LC  | CD HHC | %Error | LD LC   | LD HHC   | %Error |
|-------|-----------|--------|---------|--------|--------|--------|--------|---------|----------|--------|
| (1)   | (2)       | (3)    | (4)     | (5)    | (6)    | (7)    | (8)    | (9)     | (10)     | (11)   |
| 0.05  | 0.048     | 0.704  | 0.696   | 1.174  | 0.722  | 0.730  | -1.149 | 0.76    | 0.767    | -1.149 |
| 1.05  | 0.512     | 8.188  | 7.487   | 8.558  | 11.545 | 12.495 | -8.233 | 23.67   | 25.616   | -8.233 |
| 2.05  | 0.672     | 10.643 | 9.825   | 7.685  | 17.618 | 19.241 | -9.211 | 53.74   | 58.685   | -9.211 |
| 3.05  | 0.753     | 11.735 | 11.008  | 6.197  | 21.435 | 23.376 | -9.059 | 86.81   | 94.674   | -9.059 |
| 4.05  | 0.802     | 12.324 | 11.723  | 4.875  | 24.085 | 26.142 | -8.537 | 121.63  | 132.014  | -8.537 |
| 5.05  | 0.835     | 12.681 | 12.201  | 3.784  | 26.056 | 28.114 | -7.898 | 157.64  | 170.088  | -7.898 |
| 6.05  | 0.858     | 12.918 | 12.544  | 2.894  | 27.599 | 29.589 | -7.210 | 194.57  | 208.602  | -7.210 |
| 7.05  | 0.876     | 13.083 | 12.802  | 2.152  | 28.842 | 30.733 | -6.556 | 232.18  | 247.403  | -6.556 |
| 8.05  | 0.890     | 13.204 | 13.002  | 1.528  | 29.873 | 31.646 | -5.936 | 270.35  | 286.400  | -5.936 |
| 9.05  | 0.900     | 13.296 | 13.163  | 1.000  | 30.748 | 32.392 | -5.344 | 309.02  | 325.537  | -5.344 |
| 10.05 | 0.910     | 13.367 | 13.295  | 0.545  | 31.501 | 33.012 | -4.794 | 348.09  | 364.778  | -4.794 |
| 11.05 | 0.917     | 13.424 | 13.404  | 0.149  | 32.158 | 33.535 | -4.283 | 387.50  | 404.098  | -4.283 |
| 12.05 | 0.923     | 13.471 | 13.497  | -0.196 | 32.742 | 33.983 | -3.790 | 427.28  | 443.479  | -3.790 |
| 13.05 | 0.929     | 13.509 | 13.577  | -0.505 | 33.254 | 34.371 | -3.357 | 467.22  | 482.909  | -3.357 |
| 14.05 | 0.934     | 13.541 | 13.646  | -0.775 | 33.726 | 34.710 | -2.916 | 507.58  | 522.378  | -2.916 |
| 15.05 | 0.938     | 13.568 | 13.707  | -1.022 | 34.143 | 35.008 | -2.535 | 547.99  | 561.879  | -2.535 |
| 16.05 | 0.941     | 13.591 | 13.760  | -1.245 | 34.520 | 35.273 | -2.182 | 588.57  | 601.407  | -2.182 |
| 17.05 | 0.945     | 13.611 | 13.808  | -1.443 | 34.876 | 35.510 | -1.818 | 629.51  | 640.957  | -1.818 |
| 18.05 | 0.948     | 13.629 | 13.850  | -1.626 | 35.198 | 35.723 | -1.493 | 670.52  | 680.526  | -1.493 |
| 19.05 | 0.950     | 13.644 | 13.888  | -1.794 | 35.494 | 35.916 | -1.189 | 711.65  | 720.111  | -1.189 |
| 20.05 | 0.952     | 13.657 | 13.923  | -1.946 | 35.774 | 36.091 | -0.886 | 753.04  | 759.711  | -0.886 |
| 21.05 | 0.955     | 13.669 | 13.955  | -2.089 | 36.025 | 36.250 | -0.626 | 794.35  | 799.321  | -0.626 |
| 22.05 | 0.957     | 13.680 | 13.983  | -2.218 | 36.269 | 36.397 | -0.351 | 836.01  | 838.943  | -0.351 |
| 23.05 | 0.958     | 13.689 | 14.010  | -2.340 | 36.494 | 36.531 | -0.101 | 877.69  | 878.574  | -0.101 |
| 24.05 | 0.960     | 13.698 | 14.034  | -2.451 | 36.711 | 36.655 | 0.152  | 919.61  | 918.213  | 0.152  |
| 25.05 | 0.962     | 13.706 | 14.056  | -2.557 | 36.906 | 36.770 | 0.369  | 961.41  | 957.859  | 0.369  |
| 26.05 | 0.963     | 13.713 | 14.077  | -2.656 | 37.092 | 36.877 | 0.580  | 1003.33 | 997.511  | 0.580  |
| 27.05 | 0.964     | 13.719 | 14.096  | -2.749 | 37.267 | 36.976 | 0.782  | 1045.35 | 1037.170 | 0.782  |
| 28.05 | 0.966     | 13.726 | 14.114  | -2.832 | 37.446 | 37.068 | 1.009  | 1087.81 | 1076.830 | 1.009  |

| Z     | z/(1+z) | LTD LC | LTD HHC | %Error | CD LC  | CD HHC | %Error | LD LC   | LD HHC   | %Error |
|-------|---------|--------|---------|--------|--------|--------|--------|---------|----------|--------|
| (1)   | (2)     | (3)    | (4)     | (5)    | (6)    | (7)    | (8)    | (9)     | (10)     | (11)   |
| 29.05 | 0.967   | 13.731 | 14.131  | -2.915 | 37.600 | 37.155 | 1.184  | 1129.87 | 1116.500 | 1.184  |
| 30.05 | 0.968   | 13.736 | 14.147  | -2.991 | 37.756 | 37.236 | 1.378  | 1172.33 | 1156.170 | 1.378  |
| 31.05 | 0.969   | 13.740 | 14.161  | -3.064 | 37.901 | 37.312 | 1.553  | 1214.71 | 1195.850 | 1.553  |
| 32.05 | 0.970   | 13.744 | 14.175  | -3.134 | 38.033 | 37.384 | 1.706  | 1256.98 | 1235.530 | 1.706  |
| 33.05 | 0.971   | 13.748 | 14.188  | -3.198 | 38.167 | 37.451 | 1.874  | 1299.57 | 1275.210 | 1.874  |
| 34.05 | 0.971   | 13.752 | 14.200  | -3.258 | 38.303 | 37.515 | 2.056  | 1342.50 | 1314.900 | 2.056  |
| 35.05 | 0.972   | 13.756 | 14.212  | -3.316 | 38.425 | 37.575 | 2.212  | 1385.23 | 1354.590 | 2.212  |
| 36.05 | 0.973   | 13.759 | 14.223  | -3.373 | 38.534 | 37.632 | 2.340  | 1427.69 | 1394.280 | 2.340  |
| 37.05 | 0.974   | 13.762 | 14.233  | -3.426 | 38.644 | 37.686 | 2.479  | 1470.41 | 1433.970 | 2.479  |
| 38.05 | 0.974   | 13.765 | 14.243  | -3.476 | 38.756 | 37.738 | 2.627  | 1513.42 | 1473.660 | 2.627  |
| 39.05 | 0.975   | 13.767 | 14.252  | -3.525 | 38.853 | 37.787 | 2.744  | 1556.05 | 1513.360 | 2.744  |
| 40.05 | 0.976   | 13.770 | 14.261  | -3.572 | 38.951 | 37.833 | 2.869  | 1598.93 | 1553.060 | 2.869  |
| 41.05 | 0.976   | 13.772 | 14.270  | -3.615 | 39.050 | 37.878 | 3.002  | 1642.06 | 1592.760 | 3.002  |
| 42.05 | 0.977   | 13.774 | 14.278  | -3.656 | 39.151 | 37.920 | 3.143  | 1685.44 | 1632.460 | 3.143  |
| 43.05 | 0.977   | 13.776 | 14.286  | -3.698 | 39.235 | 37.961 | 3.249  | 1728.32 | 1672.160 | 3.249  |
| 44.05 | 0.978   | 13.778 | 14.293  | -3.737 | 39.321 | 37.999 | 3.361  | 1771.41 | 1711.870 | 3.361  |
| 45.05 | 0.978   | 13.780 | 14.300  | -3.773 | 39.408 | 38.036 | 3.480  | 1814.72 | 1751.580 | 3.480  |
| 46.05 | 0.979   | 13.782 | 14.307  | -3.811 | 39.478 | 38.072 | 3.561  | 1857.43 | 1791.280 | 3.561  |
| 47.05 | 0.979   | 13.783 | 14.313  | -3.844 | 39.566 | 38.106 | 3.690  | 1901.15 | 1830.990 | 3.691  |
| 48.05 | 0.980   | 13.785 | 14.319  | -3.878 | 39.638 | 38.139 | 3.782  | 1944.23 | 1870.700 | 3.782  |
| 49.05 | 0.980   | 13.786 | 14.325  | -3.910 | 39.710 | 38.170 | 3.878  | 1987.48 | 1910.410 | 3.878  |
| 50.05 | 0.980   | 13.788 | 14.331  | -3.941 | 39.783 | 38.200 | 3.978  | 2030.91 | 1950.120 | 3.978  |
| 51.05 | 0.981   | 13.789 | 14.337  | -3.970 | 39.856 | 38.229 | 4.082  | 2074.53 | 1989.830 | 4.083  |
| 52.05 | 0.981   | 13.790 | 14.342  | -4.000 | 39.912 | 38.257 | 4.146  | 2117.34 | 2029.550 | 4.146  |
| 53.05 | 0.981   | 13.792 | 14.347  | -4.026 | 39.987 | 38.284 | 4.259  | 2161.31 | 2069.260 | 4.259  |
| 54.05 | 0.982   | 13.793 | 14.352  | -4.054 | 40.044 | 38.310 | 4.330  | 2204.42 | 2108.980 | 4.329  |
| 55.05 | 0.982   | 13.794 | 14.357  | -4.078 | 40.120 | 38.335 | 4.449  | 2248.75 | 2148.690 | 4.449  |
| 56.05 | 0.982   | 13.795 | 14.361  | -4.104 | 40.178 | 38.360 | 4.527  | 2292.17 | 2188.410 | 4.527  |
| 57.05 | 0.983   | 13.796 | 14.366  | -4.128 | 40.237 | 38.383 | 4.607  | 2335.73 | 2228.130 | 4.607  |
| 58.05 | 0.983   | 13.797 | 14.370  | -4.151 | 40.296 | 38.405 | 4.690  | 2379.45 | 2267.840 | 4.690  |
| 59.05 | 0.983   | 13.798 | 14.374  | -4.176 | 40.335 | 38.427 | 4.730  | 2422.12 | 2307.560 | 4.729  |
| 60.05 | 0.984   | 13.799 | 14.378  | -4.198 | 40.395 | 38.448 | 4.818  | 2466.10 | 2347.280 | 4.818  |
| 61.05 | 0.984   | 13.800 | 14.382  | -4.218 | 40.455 | 38.469 | 4.909  | 2510.23 | 2387.000 | 4.909  |
| 62.05 | 0.984   | 13.800 | 14.386  | -4.240 | 40.496 | 38.489 | 4.955  | 2553.24 | 2426.710 | 4.955  |
| 63.05 | 0.984   | 13.801 | 14.389  | -4.259 | 40.557 | 38.508 | 5.051  | 2597.66 | 2466.440 | 5.051  |
| 64.05 | 0.985   | 13.802 | 14.393  | -4.280 | 40.598 | 38.527 | 5.102  | 2640.89 | 2506.150 | 5.102  |
| 65.05 | 0.985   | 13.803 | 14.396  | -4.297 | 40.660 | 38.545 | 5.202  | 2685.59 | 2545.870 | 5.202  |
| 66.05 | 0.985   | 13.804 | 14.399  | -4.317 | 40.702 | 38.562 | 5.257  | 2729.05 | 2585.600 | 5.256  |
| 67.05 | 0.985   | 13.804 | 14.403  | -4.335 | 40.744 | 38.579 | 5.313  | 2772.62 | 2625.320 | 5.312  |
| 68.05 | 0.986   | 13.805 | 14.406  | -4.353 | 40.786 | 38.596 | 5.370  | 2816.29 | 2665.040 | 5.370  |
| 69.05 | 0.986   | 13.805 | 14.409  | -4.370 | 40.829 | 38.612 | 5.430  | 2860.06 | 2704.770 | 5.430  |
| 70.05 | 0.986   | 13.806 | 14.412  | -4.387 | 40.872 | 38.628 | 5.491  | 2903.94 | 2744.480 | 5.491  |
| 71.05 | 0.986   | 13.807 | 14.415  | -4.403 | 40.915 | 38.643 | 5.554  | 2947.92 | 2784.210 | 5.554  |
| 72.05 | 0.986   | 13.807 | 14.417  | -4.419 | 40.959 | 38.658 | 5.618  | 2992.02 | 2823.930 | 5.618  |
| 73.05 | 0.986   | 13.808 | 14.420  | -4.434 | 41.002 | 38.672 | 5.684  | 3036.22 | 2863.650 | 5.684  |
| 74.05 | 0.987   | 13.808 | 14.423  | -4.448 | 41.047 | 38.686 | 5.751  | 3080.54 | 2903.380 | 5.751  |
| 75.05 | 0.987   | 13.809 | 14.425  | -4.462 | 41.091 | 38.700 | 5.820  | 3124.97 | 2943.100 | 5.820  |
| 76.05 | 0.987   | 13.809 | 14.428  | -4.478 | 41.113 | 38.713 | 5.839  | 3167.79 | 2982.820 | 5.839  |
| 77.05 | 0.987   | 13.810 | 14.430  | -4.491 | 41.158 | 38.726 | 5.910  | 3212.41 | 3022.550 | 5.910  |
| 78.05 | 0.987   | 13.810 | 14.433  | -4.506 | 41.181 | 38.739 | 5.931  | 3255.36 | 3062.280 | 5.931  |
| 79.05 | 0.988   | 13.811 | 14.435  | -4.519 | 41.227 | 38.751 | 6.005  | 3300.18 | 3102.000 | 6.005  |
| 80.05 | 0.988   | 13.811 | 14.437  | -4.531 | 41.272 | 38.763 | 6.081  | 3345.13 | 3141.730 | 6.080  |
| 81.05 | 0.988   | 13.812 | 14.439  | -4.544 | 41.296 | 38.775 | 6.105  | 3388.29 | 3181.440 | 6.105  |
| 82.05 | 0.988   | 13.812 | 14.441  | -4.556 | 41.342 | 38.786 | 6.182  | 3433.44 | 3221.180 | 6.182  |
| 83.05 | 0.988   | 13.812 | 14.444  | -4.569 | 41.365 | 38.797 | 6.208  | 3476.75 | 3260.900 | 6.208  |
| 84.05 | 0.988   | 13.813 | 14.446  | -4.582 | 41.389 | 38.808 | 6.235  | 3520.11 | 3300.630 | 6.235  |
| 85.05 | 0.988   | 13.813 | 14.448  | -4.592 | 41.436 | 38.819 | 6.316  | 3565.56 | 3340.350 | 6.316  |
| 86.05 | 0.989   | 13.814 | 14.450  | -4.604 | 41.460 | 38.829 | 6.345  | 3609.06 | 3380.080 | 6.345  |
| 87.05 | 0.989   | 13.814 | 14.451  | -4.616 | 41.484 | 38.839 | 6.374  | 3652.62 | 3419.810 | 6.374  |
| 88.05 | 0.989   | 13.814 | 14.453  | -4.625 | 41.532 | 38.849 | 6.458  | 3698.38 | 3459.540 | 6.458  |
| 89.05 | 0.989   | 13.815 | 14.455  | -4.636 | 41.556 | 38.859 | 6.489  | 3742.08 | 3499.260 | 6.489  |
| 90.05 | 0.989   | 13.815 | 14.457  | -4.647 | 41.580 | 38.869 | 6.521  | 3785.85 | 3538.980 | 6.521  |
| 91.05 | 0.989   | 13.815 | 14.459  | -4.658 | 41.604 | 38.878 | 6.553  | 3829.67 | 3578.710 | 6.553  |
| 92.05 | 0.989   | 13.816 | 14.460  | -4.666 | 41.653 | 38.887 | 6.641  | 3875.84 | 3618.450 | 6.641  |
| 93.05 | 0.989   | 13.816 | 14.462  | -4.676 | 41.678 | 38.896 | 6.675  | 3919.82 | 3658.170 | 6.675  |
| 94.05 | 0.989   | 13.816 | 14.464  | -4.686 | 41.703 | 38.905 | 6.710  | 3963.85 | 3697.910 | 6.709  |
| 95.05 | 0.990   | 13.817 | 14.465  | -4.696 | 41.728 | 38.913 | 6.745  | 4007.95 | 3737.620 | 6.745  |

| Z      | z/(1+z) | LTD LC | LTD HHC | %Error | CD LC  | CD HHC | %Error | LD LC   | LD HHC   | %Error |
|--------|---------|--------|---------|--------|--------|--------|--------|---------|----------|--------|
| (1)    | (2)     | (3)    | (4)     | (5)    | (6)    | (7)    | (8)    | (9)     | (10)     | (11)   |
| 96.05  | 0.990   | 13.817 | 14.467  | -4.705 | 41.753 | 38.922 | 6.781  | 4052.11 | 3777.350 | 6.781  |
| 97.05  | 0.990   | 13.817 | 14.468  | -4.714 | 41.778 | 38.930 | 6.817  | 4096.33 | 3817.080 | 6.817  |
| 98.05  | 0.990   | 13.817 | 14.470  | -4.723 | 41.803 | 38.938 | 6.854  | 4140.61 | 3856.820 | 6.854  |
| 99.05  | 0.990   | 13.818 | 14.471  | -4.732 | 41.829 | 38.946 | 6.892  | 4184.96 | 3896.550 | 6.892  |
| 100.05 | 0.990   | 13.818 | 14.473  | -4.740 | 41.854 | 38.954 | 6.930  | 4229.37 | 3936.260 | 6.930  |
| 101.05 | 0.990   | 13.818 | 14.474  | -4.749 | 41.880 | 38.961 | 6.969  | 4273.84 | 3975.990 | 6.969  |
| 102.05 | 0.990   | 13.818 | 14.476  | -4.757 | 41.906 | 38.969 | 7.008  | 4318.38 | 4015.710 | 7.009  |
| 103.05 | 0.990   | 13.819 | 14.477  | -4.765 | 41.932 | 38.976 | 7.049  | 4362.98 | 4055.450 | 7.049  |
| 104.05 | 0.990   | 13.819 | 14.478  | -4.773 | 41.958 | 38.983 | 7.089  | 4407.65 | 4095.180 | 7.089  |
| 105.05 | 0.991   | 13.819 | 14.480  | -4.780 | 41.984 | 38.990 | 7.130  | 4452.38 | 4134.910 | 7.130  |
| 106.05 | 0.991   | 13.819 | 14.481  | -4.788 | 42.010 | 38.997 | 7.172  | 4497.18 | 4174.640 | 7.172  |
| 107.05 | 0.991   | 13.819 | 14.482  | -4.797 | 42.010 | 39.004 | 7.156  | 4539.19 | 4214.360 | 7.156  |
| 108.05 | 0.991   | 13.820 | 14.483  | -4.804 | 42.037 | 39.011 | 7.199  | 4584.08 | 4254.090 | 7.199  |
| 109.05 | 0.991   | 13.820 | 14.485  | -4.811 | 42.063 | 39.017 | 7.242  | 4629.05 | 4293.820 | 7.242  |
| 110.05 | 0.991   | 13.820 | 14.486  | -4.818 | 42.090 | 39.024 | 7.285  | 4674.08 | 4333.560 | 7.285  |
| 111.05 | 0.991   | 13.820 | 14.487  | -4.824 | 42.117 | 39.030 | 7.330  | 4719.18 | 4373.280 | 7.330  |
| 112.05 | 0.991   | 13.821 | 14.488  | -4.831 | 42.144 | 39.036 | 7.374  | 4764.35 | 4413.020 | 7.374  |
| 113.05 | 0.991   | 13.821 | 14.489  | -4.839 | 42.144 | 39.042 | 7.360  | 4806.50 | 4452.750 | 7.360  |
| 114.05 | 0.991   | 13.821 | 14.490  | -4.845 | 42.171 | 39.048 | 7.405  | 4851.77 | 4492.490 | 7.405  |
| 115.05 | 0.991   | 13.821 | 14.492  | -4.851 | 42.198 | 39.054 | 7.451  | 4897.11 | 4532.200 | 7.451  |
| 116.05 | 0.991   | 13.821 | 14.493  | -4.857 | 42.226 | 39.060 | 7.498  | 4942.52 | 4571.930 | 7.498  |
| 117.05 | 0.992   | 13.821 | 14.494  | -4.865 | 42.226 | 39.065 | 7.485  | 4984.75 | 4611.650 | 7.485  |
| 118.05 | 0.992   | 13.821 | 14.495  | -4.871 | 42.253 | 39.071 | 7.532  | 5030.26 | 4651.390 | 7.532  |
| 119.05 | 0.992   | 13.822 | 14.496  | -4.877 | 42.281 | 39.076 | 7.580  | 5075.85 | 4691.120 | 7.580  |
| 120.05 | 0.992   | 13.822 | 14.497  | -4.884 | 42.281 | 39.082 | 7.567  | 5118.14 | 4730.870 | 7.567  |
| 121.05 | 0.992   | 13.822 | 14.498  | -4.889 | 42.309 | 39.087 | 7.615  | 5163.83 | 4770.580 | 7.615  |
| 122.05 | 0.992   | 13.822 | 14.499  | -4.895 | 42.337 | 39.092 | 7.664  | 5209.60 | 4810.310 | 7.665  |
| 123.05 | 0.992   | 13.822 | 14.500  | -4.901 | 42.337 | 39.098 | 7.652  | 5251.94 | 4850.030 | 7.653  |
| 124.05 | 0.992   | 13.822 | 14.501  | -4.907 | 42.366 | 39.103 | 7.702  | 5297.81 | 4889.780 | 7.702  |
| 125.05 | 0.992   | 13.823 | 14.502  | -4.912 | 42.394 | 39.108 | 7.752  | 5343.76 | 4929.500 | 7.752  |
| 126.05 | 0.992   | 13.823 | 14.502  | -4.918 | 42.394 | 39.113 | 7.741  | 5386.16 | 4969.240 | 7.741  |
| 127.05 | 0.992   | 13.823 | 14.503  | -4.923 | 42.423 | 39.117 | 7.791  | 5432.22 | 5008.960 | 7.792  |
| 128.05 | 0.992   | 13.823 | 14.504  | -4.928 | 42.451 | 39.122 | 7.843  | 5478.36 | 5048.680 | 7.843  |
| 129.05 | 0.992   | 13.823 | 14.505  | -4.934 | 42.451 | 39.127 | 7.832  | 5520.81 | 5088.430 | 7.832  |
| 130.05 | 0.992   | 13.823 | 14.506  | -4.938 | 42.480 | 39.131 | 7.884  | 5567.06 | 5128.180 | 7.884  |
| 131.05 | 0.992   | 13.823 | 14.507  | -4.945 | 42.480 | 39.136 | 7.873  | 5609.54 | 5167.890 | 7.873  |
| 132.05 | 0.992   | 13.823 | 14.508  | -4.949 | 42.510 | 39.140 | 7.926  | 5655.90 | 5207.620 | 7.926  |
| 133.05 | 0.993   | 13.823 | 14.508  | -4.955 | 42.510 | 39.145 | 7.916  | 5698.41 | 5247.370 | 7.915  |
| 134.05 | 0.993   | 13.824 | 14.509  | -4.959 | 42.539 | 39.149 | 7.969  | 5744.89 | 5287.070 | 7.969  |
| 135.05 | 0.993   | 13.824 | 14.510  | -4.965 | 42.539 | 39.153 | 7.959  | 5787.43 | 5326.800 | 7.959  |
| 136.05 | 0.993   | 13.824 | 14.511  | -4.969 | 42.569 | 39.158 | 8.013  | 5834.02 | 5366.540 | 8.013  |
| 137.05 | 0.993   | 13.824 | 14.512  | -4.973 | 42.598 | 39.162 | 8.067  | 5880.69 | 5406.280 | 8.067  |
| 138.05 | 0.993   | 13.824 | 14.512  | -4.978 | 42.598 | 39.166 | 8.058  | 5923.29 | 5446.010 | 8.058  |
| 139.05 | 0.993   | 13.824 | 14.513  | -4.982 | 42.628 | 39.170 | 8.113  | 5970.08 | 5485.760 | 8.112  |
| 140.05 | 0.993   | 13.824 | 14.514  | -4.987 | 42.628 | 39.174 | 8.104  | 6012.71 | 5525.480 | 8.103  |
| 141.05 | 0.993   | 13.825 | 14.515  | -4.991 | 42.658 | 39.178 | 8.159  | 6059.62 | 5565.190 | 8.159  |
| 142.05 | 0.993   | 13.825 | 14.515  | -4.996 | 42.658 | 39.182 | 8.150  | 6102.28 | 5604.940 | 8.150  |
| 143.05 | 0.993   | 13.825 | 14.516  | -5.000 | 42.689 | 39.186 | 8.207  | 6149.31 | 5644.670 | 8.207  |
| 144.05 | 0.993   | 13.825 | 14.517  | -5.005 | 42.689 | 39.189 | 8.198  | 6192.00 | 5684.400 | 8.198  |
| 145.05 | 0.993   | 13.825 | 14.517  | -5.008 | 42.719 | 39.193 | 8.255  | 6239.16 | 5724.130 | 8.255  |
| 146.05 | 0.993   | 13.825 | 14.518  | -5.013 | 42.719 | 39.197 | 8.246  | 6281.88 | 5763.860 | 8.246  |
| 147.05 | 0.993   | 13.825 | 14.519  | -5.018 | 42.719 | 39.200 | 8.238  | 6324.60 | 5803.610 | 8.238  |
| 148.05 | 0.993   | 13.825 | 14.519  | -5.021 | 42.750 | 39.204 | 8.296  | 6371.90 | 5843.320 | 8.296  |
| 149.05 | 0.993   | 13.825 | 14.520  | -5.026 | 42.750 | 39.207 | 8.287  | 6414.65 | 5883.050 | 8.287  |
| 150.05 | 0.993   | 13.825 | 14.521  | -5.029 | 42.781 | 39.211 | 8.346  | 6462.09 | 5922.770 | 8.346  |
| 151.05 | 0.993   | 13.825 | 14.521  | -5.034 | 42.781 | 39.214 | 8.338  | 6504.87 | 5962.520 | 8.338  |
| 152.05 | 0.993   | 13.826 | 14.522  | -5.037 | 42.812 | 39.218 | 8.397  | 6552.43 | 6002.260 | 8.396  |
| 153.05 | 0.994   | 13.826 | 14.523  | -5.041 | 42.812 | 39.221 | 8.389  | 6595.24 | 6041.960 | 8.389  |
| 154.05 | 0.994   | 13.826 | 14.523  | -5.044 | 42.844 | 39.224 | 8.448  | 6642.94 | 6081.720 | 8.448  |
| 155.05 | 0.994   | 13.826 | 14.524  | -5.048 | 42.844 | 39.228 | 8.441  | 6685.78 | 6121.430 | 8.441  |
| 156.05 | 0.994   | 13.826 | 14.524  | -5.053 | 42.844 | 39.231 | 8.433  | 6728.62 | 6161.190 | 8.433  |
| 157.05 | 0.994   | 13.826 | 14.525  | -5.055 | 42.876 | 39.234 | 8.494  | 6776.48 | 6200.930 | 8.493  |
| 158.05 | 0.994   | 13.826 | 14.526  | -5.060 | 42.876 | 39.237 | 8.486  | 6819.35 | 6240.640 | 8.486  |
| 159.05 | 0.994   | 13.826 | 14.526  | -5.062 | 42.908 | 39.240 | 8.547  | 6867.34 | 6280.360 | 8.547  |
| 160.05 | 0.994   | 13.826 | 14.527  | -5.066 | 42.908 | 39.243 | 8.540  | 6910.25 | 6320.100 | 8.540  |
| 161.05 | 0.994   | 13.826 | 14.527  | -5.070 | 42.908 | 39.246 | 8.533  | 6953.16 | 6359.840 | 8.533  |
| 162.05 | 0.994   | 13.826 | 14.528  | -5.073 | 42.940 | 39.249 | 8.595  | 7001.31 | 6399.580 | 8.595  |

| Z      | z/(1+z) | LTD LC | LTD HHC | %Error | CD LC  | CD HHC | %Error | LD LC    | LD HHC   | %Error |
|--------|---------|--------|---------|--------|--------|--------|--------|----------|----------|--------|
| (1)    | (2)     | (3)    | (4)     | (5)    | (6)    | (7)    | (8)    | (9)      | (10)     | (11)   |
| 163.05 | 0.994   | 13.826 | 14.528  | -5.077 | 42.940 | 39.252 | 8.588  | 7044.25  | 6439.300 | 8.588  |
| 164.05 | 0.994   | 13.826 | 14.529  | -5.081 | 42.940 | 39.255 | 8.581  | 7087.19  | 6479.050 | 8.581  |
| 165.05 | 0.994   | 13.827 | 14.529  | -5.083 | 42.972 | 39.258 | 8.643  | 7135.52  | 6518.770 | 8.643  |
| 166.05 | 0.994   | 13.827 | 14.530  | -5.087 | 42.972 | 39.261 | 8.637  | 7178.49  | 6558.520 | 8.637  |
| 167.05 | 0.994   | 13.827 | 14.530  | -5.091 | 42.972 | 39.264 | 8.630  | 7221.46  | 6598.210 | 8.631  |
| 168.05 | 0.994   | 13.827 | 14.531  | -5.093 | 43.005 | 39.266 | 8.693  | 7269.96  | 6637.970 | 8.693  |
| 169.05 | 0.994   | 13.827 | 14.532  | -5.097 | 43.005 | 39.269 | 8.687  | 7312.97  | 6677.730 | 8.687  |
| 170.05 | 0.994   | 13.827 | 14.532  | -5.099 | 43.038 | 39.272 | 8.751  | 7361.61  | 6717.400 | 8.751  |
| 171.05 | 0.994   | 13.827 | 14.533  | -5.102 | 43.038 | 39.274 | 8.744  | 7404.65  | 6757.130 | 8.745  |
| 172.05 | 0.994   | 13.827 | 14.533  | -5.106 | 43.038 | 39.277 | 8.738  | 7447.69  | 6796.900 | 8.738  |
| 173.05 | 0.994   | 13.827 | 14.533  | -5.108 | 43.071 | 39.280 | 8.803  | 7496.51  | 6836.630 | 8.803  |
| 174.05 | 0.994   | 13.827 | 14.534  | -5.112 | 43.071 | 39.282 | 8.797  | 7539.58  | 6876.390 | 8.796  |
| 175.05 | 0.994   | 13.827 | 14.534  | -5.115 | 43.071 | 39.285 | 8.791  | 7582.65  | 6916.090 | 8.791  |
| 176.05 | 0.994   | 13.827 | 14.535  | -5.117 | 43.105 | 39.287 | 8.856  | 7631.66  | 6955.800 | 8.856  |
| 177.05 | 0.994   | 13.827 | 14.535  | -5.120 | 43.105 | 39.290 | 8.850  | 7674.76  | 6995.520 | 8.850  |
| 178.05 | 0.994   | 13.827 | 14.536  | -5.124 | 43.105 | 39.292 | 8.844  | 7717.87  | 7035.310 | 8.844  |
| 179.05 | 0.994   | 13.827 | 14.536  | -5.127 | 43.105 | 39.295 | 8.839  | 7760.97  | 7075.010 | 8.839  |
| 180.05 | 0.994   | 13.828 | 14.537  | -5.129 | 43.138 | 39.297 | 8.904  | 7810.20  | 7114.760 | 8.904  |
| 181.05 | 0.995   | 13.828 | 14.537  | -5.132 | 43.138 | 39.300 | 8.899  | 7853.34  | 7154.500 | 8.899  |
| 182.05 | 0.995   | 13.828 | 14.538  | -5.135 | 43.138 | 39.302 | 8.893  | 7896.47  | 7194.190 | 8.894  |
| 183.05 | 0.995   | 13.828 | 14.538  | -5.137 | 43.172 | 39.304 | 8.960  | 7945.89  | 7233.930 | 8.960  |
| 184.05 | 0.995   | 13.828 | 14.538  | -5.140 | 43.172 | 39.307 | 8.955  | 7989.06  | 7273.690 | 8.954  |
| 185.05 | 0.995   | 13.828 | 14.539  | -5.143 | 43.172 | 39.309 | 8.949  | 8032.23  | 7313.400 | 8.949  |
| 186.05 | 0.995   | 13.828 | 14.539  | -5.145 | 43.207 | 39.311 | 9.016  | 8081.84  | 7353.120 | 9.017  |
| 187.05 | 0.995   | 13.828 | 14.540  | -5.148 | 43.207 | 39.313 | 9.011  | 8125.05  | 7392.860 | 9.012  |
| 188.05 | 0.995   | 13.828 | 14.540  | -5.151 | 43.207 | 39.316 | 9.006  | 8168.25  | 7432.600 | 9.006  |
| 189.05 | 0.995   | 13.828 | 14.541  | -5.153 | 43.207 | 39.318 | 9.001  | 8211.46  | 7472.330 | 9.001  |
| 190.05 | 0.995   | 13.828 | 14.541  | -5.155 | 43.242 | 39.320 | 9.069  | 8261.30  | 7512.060 | 9.069  |
| 191.05 | 0.995   | 13.828 | 14.541  | -5.158 | 43.242 | 39.322 | 9.064  | 8304.54  | 7551.770 | 9.065  |
| 192.05 | 0.995   | 13.828 | 14.542  | -5.161 | 43.242 | 39.324 | 9.059  | 8347.78  | 7591.550 | 9.059  |
| 193.05 | 0.995   | 13.828 | 14.542  | -5.164 | 43.242 | 39.326 | 9.054  | 8391.02  | 7631.290 | 9.054  |
| 194.05 | 0.995   | 13.828 | 14.543  | -5.165 | 43.277 | 39.328 | 9.123  | 8441.10  | 7671.000 | 9.123  |
| 195.05 | 0.995   | 13.828 | 14.543  | -5.168 | 43.277 | 39.331 | 9.118  | 8484.37  | 7710.760 | 9.118  |
| 196.05 | 0.995   | 13.828 | 14.543  | -5.170 | 43.277 | 39.333 | 9.114  | 8527.65  | 7750.460 | 9.114  |
| 197.05 | 0.995   | 13.828 | 14.544  | -5.172 | 43.312 | 39.335 | 9.183  | 8577.93  | 7790.210 | 9.183  |
| 198.05 | 0.995   | 13.828 | 14.544  | -5.175 | 43.312 | 39.337 | 9.179  | 8621.24  | 7829.980 | 9.178  |
| 199.05 | 0.995   | 13.828 | 14.544  | -5.177 | 43.312 | 39.339 | 9.174  | 8664.55  | 7869.680 | 9.174  |
| 200.05 | 0.995   | 13.828 | 14.545  | -5.180 | 43.312 | 39.341 | 9.169  | 8707.86  | 7909.400 | 9.169  |
| 201.05 | 0.995   | 13.829 | 14.545  | -5.181 | 43.348 | 39.342 | 9.240  | 8758.39  | 7949.130 | 9.240  |
| 202.05 | 0.995   | 13.829 | 14.545  | -5.184 | 43.348 | 39.344 | 9.235  | 8801.73  | 7988.870 | 9.235  |
| 203.05 | 0.995   | 13.829 | 14.546  | -5.186 | 43.348 | 39.346 | 9.231  | 8845.08  | 8028.610 | 9.231  |
| 204.05 | 0.995   | 13.829 | 14.546  | -5.189 | 43.348 | 39.348 | 9.227  | 8888.43  | 8068.350 | 9.226  |
| 205.05 | 0.995   | 13.829 | 14.547  | -5.191 | 43.348 | 39.350 | 9.222  | 8931.78  | 8108.070 | 9.222  |
| 206.05 | 0.995   | 13.829 | 14.547  | -5.192 | 43.384 | 39.352 | 9.293  | 8982.58  | 8147.780 | 9.294  |
| 207.05 | 0.995   | 13.829 | 14.547  | -5.195 | 43.384 | 39.354 | 9.289  | 9025.97  | 8187.560 | 9.289  |
| 208.05 | 0.995   | 13.829 | 14.548  | -5.197 | 43.384 | 39.356 | 9.285  | 9069.35  | 8227.220 | 9.285  |
| 209.05 | 0.995   | 13.829 | 14.548  | -5.200 | 43.384 | 39.357 | 9.281  | 9112.73  | 8267.050 | 9.280  |
| 210.05 | 0.995   | 13.829 | 14.548  | -5.201 | 43.420 | 39.359 | 9.353  | 9163.80  | 8306.730 | 9.353  |
| 211.05 | 0.995   | 13.829 | 14.549  | -5.203 | 43.420 | 39.361 | 9.349  | 9207.22  | 8346.480 | 9.349  |
| 212.05 | 0.995   | 13.829 | 14.549  | -5.205 | 43.420 | 39.363 | 9.345  | 9250.64  | 8386.170 | 9.345  |
| 213.05 | 0.995   | 13.829 | 14.549  | -5.208 | 43.420 | 39.364 | 9.341  | 9294.06  | 8425.920 | 9.341  |
| 214.05 | 0.995   | 13.829 | 14.549  | -5.210 | 43.420 | 39.366 | 9.337  | 9337.48  | 8465.710 | 9.336  |
| 215.05 | 0.995   | 13.829 | 14.550  | -5.211 | 43.457 | 39.368 | 9.410  | 9388.84  | 8505.430 | 9.409  |
| 216.05 | 0.995   | 13.829 | 14.550  | -5.213 | 43.457 | 39.369 | 9.406  | 9432.30  | 8545.080 | 9.406  |
| 217.05 | 0.995   | 13.829 | 14.550  | -5.216 | 43.457 | 39.371 | 9.402  | 9475.75  | 8584.870 | 9.402  |
| 218.05 | 0.995   | 13.829 | 14.551  | -5.218 | 43.457 | 39.373 | 9.398  | 9519.21  | 8624.570 | 9.398  |
| 219.05 | 0.995   | 13.829 | 14.551  | -5.219 | 43.494 | 39.374 | 9.472  | 9570.84  | 8664.300 | 9.472  |
| 220.05 | 0.995   | 13.829 | 14.551  | -5.221 | 43.494 | 39.376 | 9.468  | 9614.33  | 8704.040 | 9.468  |
| 221.05 | 0.995   | 13.829 | 14.552  | -5.223 | 43.494 | 39.378 | 9.464  | 9657.82  | 8743.800 | 9.464  |
| 222.05 | 0.996   | 13.829 | 14.552  | -5.225 | 43.494 | 39.379 | 9.460  | 9701.32  | 8783.560 | 9.460  |
| 223.05 | 0.996   | 13.829 | 14.552  | -5.227 | 43.494 | 39.381 | 9.457  | 9744.81  | 8823.210 | 9.457  |
| 224.05 | 0.996   | 13.830 | 14.553  | -5.228 | 43.531 | 39.382 | 9.531  | 9796.75  | 8862.970 | 9.531  |
| 225.05 | 0.996   | 13.830 | 14.553  | -5.230 | 43.531 | 39.384 | 9.528  | 9840.28  | 8902.730 | 9.528  |
| 226.05 | 0.996   | 13.830 | 14.553  | -5.232 | 43.531 | 39.385 | 9.524  | 9883.81  | 8942.480 | 9.524  |
| 227.05 | 0.996   | 13.830 | 14.553  | -5.234 | 43.531 | 39.387 | 9.521  | 9927.34  | 8982.210 | 9.521  |
| 228.05 | 0.996   | 13.830 | 14.554  | -5.236 | 43.531 | 39.389 | 9.517  | 9970.88  | 9021.920 | 9.517  |
| 229.05 | 0.996   | 13.830 | 14.554  | -5.237 | 43.569 | 39.390 | 9.593  | 10023.10 | 9061.600 | 9.593  |

| Z      | $z/(1+z)$ | LTD LC | LTD HHC | %Error | CD LC  | CD HHC | %Error | LD LC    | LD HHC    | %Error |
|--------|-----------|--------|---------|--------|--------|--------|--------|----------|-----------|--------|
| (1)    | (2)       | (3)    | (4)     | (5)    | (6)    | (7)    | (8)    | (9)      | (10)      | (11)   |
| 230.05 | 0.996     | 13.830 | 14.554  | -5.239 | 43.569 | 39.391 | 9.589  | 10066.70 | 9101.380  | 9.589  |
| 231.05 | 0.996     | 13.830 | 14.554  | -5.241 | 43.569 | 39.393 | 9.586  | 10110.30 | 9141.120  | 9.586  |
| 232.05 | 0.996     | 13.830 | 14.555  | -5.243 | 43.569 | 39.394 | 9.582  | 10153.80 | 9180.830  | 9.583  |
| 233.05 | 0.996     | 13.830 | 14.555  | -5.245 | 43.569 | 39.396 | 9.579  | 10197.40 | 9220.620  | 9.579  |
| 234.05 | 0.996     | 13.830 | 14.555  | -5.247 | 43.569 | 39.397 | 9.576  | 10241.00 | 9260.350  | 9.575  |
| 235.05 | 0.996     | 13.830 | 14.556  | -5.247 | 43.608 | 39.399 | 9.652  | 10293.60 | 9300.040  | 9.652  |
| 236.05 | 0.996     | 13.830 | 14.556  | -5.249 | 43.608 | 39.400 | 9.649  | 10337.20 | 9339.790  | 9.649  |
| 237.05 | 0.996     | 13.830 | 14.556  | -5.251 | 43.608 | 39.402 | 9.646  | 10380.80 | 9379.480  | 9.646  |
| 238.05 | 0.996     | 13.830 | 14.556  | -5.253 | 43.608 | 39.403 | 9.642  | 10424.40 | 9419.240  | 9.643  |
| 239.05 | 0.996     | 13.830 | 14.557  | -5.255 | 43.608 | 39.404 | 9.639  | 10468.00 | 9458.920  | 9.640  |
| 240.05 | 0.996     | 13.830 | 14.557  | -5.255 | 43.647 | 39.406 | 9.716  | 10521.00 | 9498.660  | 9.717  |
| 241.05 | 0.996     | 13.830 | 14.557  | -5.257 | 43.647 | 39.407 | 9.713  | 10564.60 | 9538.460  | 9.713  |
| 242.05 | 0.996     | 13.830 | 14.557  | -5.259 | 43.647 | 39.408 | 9.710  | 10608.30 | 9578.170  | 9.710  |
| 243.05 | 0.996     | 13.830 | 14.558  | -5.261 | 43.647 | 39.410 | 9.707  | 10651.90 | 9617.920  | 9.707  |
| 244.05 | 0.996     | 13.830 | 14.558  | -5.263 | 43.647 | 39.411 | 9.704  | 10695.60 | 9657.720  | 9.703  |
| 245.05 | 0.996     | 13.830 | 14.558  | -5.264 | 43.647 | 39.412 | 9.701  | 10739.20 | 9697.420  | 9.701  |
| 246.05 | 0.996     | 13.830 | 14.558  | -5.265 | 43.686 | 39.414 | 9.779  | 10792.50 | 9737.150  | 9.779  |
| 247.05 | 0.996     | 13.830 | 14.559  | -5.267 | 43.686 | 39.415 | 9.776  | 10836.20 | 9776.920  | 9.776  |
| 248.05 | 0.996     | 13.830 | 14.559  | -5.268 | 43.686 | 39.416 | 9.773  | 10879.90 | 9816.570  | 9.774  |
| 249.05 | 0.996     | 13.830 | 14.559  | -5.270 | 43.686 | 39.417 | 9.770  | 10923.60 | 9856.390  | 9.770  |
| 250.05 | 0.996     | 13.830 | 14.559  | -5.272 | 43.686 | 39.419 | 9.768  | 10967.30 | 9896.080  | 9.767  |
| 251.05 | 0.996     | 13.830 | 14.559  | -5.273 | 43.686 | 39.420 | 9.765  | 11011.00 | 9935.800  | 9.765  |
| 252.05 | 0.996     | 13.830 | 14.560  | -5.275 | 43.686 | 39.421 | 9.762  | 11054.70 | 9975.520  | 9.762  |
| 253.05 | 0.996     | 13.830 | 14.560  | -5.276 | 43.725 | 39.422 | 9.841  | 11108.40 | 10015.300 | 9.841  |
| 254.05 | 0.996     | 13.830 | 14.560  | -5.277 | 43.725 | 39.424 | 9.838  | 11152.10 | 10055.000 | 9.838  |
| 255.05 | 0.996     | 13.830 | 14.560  | -5.279 | 43.725 | 39.425 | 9.835  | 11195.90 | 10094.800 | 9.835  |
| 256.05 | 0.996     | 13.830 | 14.561  | -5.280 | 43.725 | 39.426 | 9.833  | 11239.60 | 10134.500 | 9.832  |
| 257.05 | 0.996     | 13.830 | 14.561  | -5.282 | 43.725 | 39.427 | 9.830  | 11283.30 | 10174.200 | 9.829  |
| 258.05 | 0.996     | 13.830 | 14.561  | -5.284 | 43.725 | 39.428 | 9.827  | 11327.00 | 10214.000 | 9.827  |
| 259.05 | 0.996     | 13.830 | 14.561  | -5.284 | 43.766 | 39.430 | 9.907  | 11381.20 | 10253.700 | 9.907  |
| 260.05 | 0.996     | 13.830 | 14.561  | -5.285 | 43.766 | 39.431 | 9.905  | 11425.00 | 10293.400 | 9.904  |
| 261.05 | 0.996     | 13.830 | 14.562  | -5.287 | 43.766 | 39.432 | 9.902  | 11468.70 | 10333.100 | 9.902  |
| 262.05 | 0.996     | 13.830 | 14.562  | -5.289 | 43.766 | 39.433 | 9.899  | 11512.50 | 10372.800 | 9.900  |
| 263.05 | 0.996     | 13.830 | 14.562  | -5.290 | 43.766 | 39.434 | 9.897  | 11556.30 | 10412.600 | 9.897  |
| 264.05 | 0.996     | 13.830 | 14.562  | -5.292 | 43.766 | 39.435 | 9.894  | 11600.00 | 10452.400 | 9.894  |
| 265.05 | 0.996     | 13.830 | 14.563  | -5.293 | 43.766 | 39.436 | 9.892  | 11643.80 | 10492.100 | 9.891  |
| 266.05 | 0.996     | 13.831 | 14.563  | -5.293 | 43.806 | 39.438 | 9.973  | 11698.40 | 10531.800 | 9.972  |
| 267.05 | 0.996     | 13.831 | 14.563  | -5.295 | 43.806 | 39.439 | 9.970  | 11742.20 | 10571.500 | 9.970  |
| 268.05 | 0.996     | 13.831 | 14.563  | -5.296 | 43.806 | 39.440 | 9.968  | 11786.00 | 10611.300 | 9.967  |
| 269.05 | 0.996     | 13.831 | 14.563  | -5.298 | 43.806 | 39.441 | 9.965  | 11829.80 | 10651.000 | 9.965  |
| 270.05 | 0.996     | 13.831 | 14.564  | -5.299 | 43.806 | 39.442 | 9.963  | 11873.60 | 10690.700 | 9.962  |
| 271.05 | 0.996     | 13.831 | 14.564  | -5.301 | 43.806 | 39.443 | 9.960  | 11917.50 | 10730.400 | 9.961  |
| 272.05 | 0.996     | 13.831 | 14.564  | -5.302 | 43.806 | 39.444 | 9.958  | 11961.30 | 10770.100 | 9.958  |
| 273.05 | 0.996     | 13.831 | 14.564  | -5.302 | 43.847 | 39.445 | 10.040 | 12016.30 | 10809.800 | 10.041 |
| 274.05 | 0.996     | 13.831 | 14.564  | -5.304 | 43.847 | 39.446 | 10.037 | 12060.20 | 10849.700 | 10.038 |
| 275.05 | 0.996     | 13.831 | 14.565  | -5.305 | 43.847 | 39.447 | 10.035 | 12104.00 | 10889.400 | 10.035 |
| 276.05 | 0.996     | 13.831 | 14.565  | -5.307 | 43.847 | 39.448 | 10.033 | 12147.90 | 10929.100 | 10.033 |
| 277.05 | 0.996     | 13.831 | 14.565  | -5.308 | 43.847 | 39.449 | 10.030 | 12191.70 | 10968.800 | 10.031 |
| 278.05 | 0.996     | 13.831 | 14.565  | -5.309 | 43.847 | 39.450 | 10.028 | 12235.60 | 11008.500 | 10.029 |
| 279.05 | 0.996     | 13.831 | 14.565  | -5.311 | 43.847 | 39.451 | 10.026 | 12279.40 | 11048.300 | 10.026 |
| 280.05 | 0.996     | 13.831 | 14.565  | -5.312 | 43.847 | 39.452 | 10.023 | 12323.30 | 11088.000 | 10.024 |
| 281.05 | 0.996     | 13.831 | 14.566  | -5.312 | 43.889 | 39.453 | 10.107 | 12378.90 | 11127.800 | 10.106 |
| 282.05 | 0.996     | 13.831 | 14.566  | -5.314 | 43.889 | 39.454 | 10.104 | 12422.80 | 11167.500 | 10.104 |
| 283.05 | 0.996     | 13.831 | 14.566  | -5.315 | 43.889 | 39.455 | 10.102 | 12466.70 | 11207.300 | 10.102 |
| 284.05 | 0.996     | 13.831 | 14.566  | -5.316 | 43.889 | 39.456 | 10.100 | 12510.50 | 11247.000 | 10.100 |
| 285.05 | 0.997     | 13.831 | 14.566  | -5.317 | 43.889 | 39.457 | 10.098 | 12554.40 | 11286.800 | 10.097 |
| 286.05 | 0.997     | 13.831 | 14.567  | -5.319 | 43.889 | 39.458 | 10.096 | 12598.30 | 11326.500 | 10.096 |
| 287.05 | 0.997     | 13.831 | 14.567  | -5.320 | 43.889 | 39.459 | 10.093 | 12642.20 | 11366.200 | 10.093 |
| 288.05 | 0.997     | 13.831 | 14.567  | -5.321 | 43.889 | 39.460 | 10.091 | 12686.10 | 11405.900 | 10.092 |
| 289.05 | 0.997     | 13.831 | 14.567  | -5.321 | 43.931 | 39.461 | 10.175 | 12742.20 | 11445.800 | 10.175 |
| 290.05 | 0.997     | 13.831 | 14.567  | -5.323 | 43.931 | 39.462 | 10.173 | 12786.20 | 11485.300 | 10.174 |
| 291.05 | 0.997     | 13.831 | 14.567  | -5.324 | 43.931 | 39.463 | 10.171 | 12830.10 | 11525.200 | 10.171 |
| 292.05 | 0.997     | 13.831 | 14.568  | -5.325 | 43.931 | 39.464 | 10.169 | 12874.00 | 11564.900 | 10.169 |
| 293.05 | 0.997     | 13.831 | 14.568  | -5.326 | 43.931 | 39.465 | 10.167 | 12918.00 | 11604.500 | 10.168 |
| 294.05 | 0.997     | 13.831 | 14.568  | -5.328 | 43.931 | 39.466 | 10.165 | 12961.90 | 11644.400 | 10.165 |
| 295.05 | 0.997     | 13.831 | 14.568  | -5.329 | 43.931 | 39.467 | 10.163 | 13005.80 | 11684.100 | 10.163 |
| 296.05 | 0.997     | 13.831 | 14.568  | -5.330 | 43.931 | 39.467 | 10.161 | 13049.80 | 11723.900 | 10.160 |

| Z      | z/(1+z) | LTD LC | LTD HHC | %Error | CD LC  | CD HHC | %Error | LD LC    | LD HHC    | %Error |
|--------|---------|--------|---------|--------|--------|--------|--------|----------|-----------|--------|
| (1)    | (2)     | (3)    | (4)     | (5)    | (6)    | (7)    | (8)    | (9)      | (10)      | (11)   |
| 297.05 | 0.997   | 13.831 | 14.568  | -5.331 | 43.931 | 39.468 | 10.159 | 13093.70 | 11763.500 | 10.159 |
| 298.05 | 0.997   | 13.831 | 14.569  | -5.331 | 43.974 | 39.469 | 10.244 | 13150.40 | 11803.200 | 10.245 |
| 299.05 | 0.997   | 13.831 | 14.569  | -5.332 | 43.974 | 39.470 | 10.242 | 13194.40 | 11842.900 | 10.243 |
| 300.05 | 0.997   | 13.831 | 14.569  | -5.334 | 43.974 | 39.471 | 10.240 | 13238.40 | 11882.700 | 10.240 |
| 301.05 | 0.997   | 13.831 | 14.569  | -5.335 | 43.974 | 39.472 | 10.238 | 13282.30 | 11922.400 | 10.239 |
| 302.05 | 0.997   | 13.831 | 14.569  | -5.336 | 43.974 | 39.473 | 10.236 | 13326.30 | 11962.200 | 10.236 |
| 303.05 | 0.997   | 13.831 | 14.569  | -5.337 | 43.974 | 39.474 | 10.234 | 13370.30 | 12002.000 | 10.234 |
| 304.05 | 0.997   | 13.831 | 14.570  | -5.338 | 43.974 | 39.474 | 10.232 | 13414.30 | 12041.700 | 10.232 |
| 305.05 | 0.997   | 13.831 | 14.570  | -5.339 | 43.974 | 39.475 | 10.231 | 13458.20 | 12081.300 | 10.231 |
| 306.05 | 0.997   | 13.831 | 14.570  | -5.341 | 43.974 | 39.476 | 10.229 | 13502.20 | 12121.100 | 10.229 |
| 307.05 | 0.997   | 13.831 | 14.570  | -5.341 | 44.017 | 39.477 | 10.315 | 13559.60 | 12160.800 | 10.316 |
| 308.05 | 0.997   | 13.831 | 14.570  | -5.342 | 44.017 | 39.478 | 10.313 | 13603.60 | 12200.700 | 10.313 |
| 309.05 | 0.997   | 13.831 | 14.570  | -5.342 | 44.017 | 39.479 | 10.311 | 13647.60 | 12240.400 | 10.311 |
| 310.05 | 0.997   | 13.831 | 14.570  | -5.344 | 44.017 | 39.479 | 10.310 | 13691.60 | 12280.100 | 10.309 |
| 311.05 | 0.997   | 13.831 | 14.571  | -5.345 | 44.017 | 39.480 | 10.308 | 13735.60 | 12319.700 | 10.309 |
| 312.05 | 0.997   | 13.831 | 14.571  | -5.346 | 44.017 | 39.481 | 10.306 | 13779.60 | 12359.500 | 10.306 |
| 313.05 | 0.997   | 13.831 | 14.571  | -5.347 | 44.017 | 39.482 | 10.304 | 13823.70 | 12399.300 | 10.304 |
| 314.05 | 0.997   | 13.831 | 14.571  | -5.348 | 44.017 | 39.483 | 10.302 | 13867.70 | 12438.900 | 10.303 |
| 315.05 | 0.997   | 13.831 | 14.571  | -5.349 | 44.017 | 39.483 | 10.300 | 13911.70 | 12478.700 | 10.300 |
| 316.05 | 0.997   | 13.831 | 14.571  | -5.350 | 44.017 | 39.484 | 10.299 | 13955.70 | 12518.400 | 10.299 |
| 317.05 | 0.997   | 13.831 | 14.572  | -5.350 | 44.061 | 39.485 | 10.387 | 14013.70 | 12558.300 | 10.386 |
| 318.05 | 0.997   | 13.831 | 14.572  | -5.351 | 44.061 | 39.486 | 10.385 | 14057.80 | 12597.900 | 10.385 |
| 319.05 | 0.997   | 13.831 | 14.572  | -5.352 | 44.061 | 39.487 | 10.383 | 14101.90 | 12637.600 | 10.384 |
| 320.05 | 0.997   | 13.831 | 14.572  | -5.353 | 44.061 | 39.487 | 10.381 | 14145.90 | 12677.500 | 10.381 |
| 321.05 | 0.997   | 13.831 | 14.572  | -5.354 | 44.061 | 39.488 | 10.380 | 14190.00 | 12717.200 | 10.379 |
| 322.05 | 0.997   | 13.831 | 14.572  | -5.355 | 44.061 | 39.489 | 10.378 | 14234.00 | 12756.800 | 10.378 |
| 323.05 | 0.997   | 13.831 | 14.572  | -5.356 | 44.061 | 39.490 | 10.376 | 14278.10 | 12796.500 | 10.377 |
| 324.05 | 0.997   | 13.831 | 14.573  | -5.357 | 44.061 | 39.490 | 10.374 | 14322.20 | 12836.400 | 10.374 |
| 325.05 | 0.997   | 13.831 | 14.573  | -5.358 | 44.061 | 39.491 | 10.373 | 14366.20 | 12876.100 | 10.373 |
| 326.05 | 0.997   | 13.831 | 14.573  | -5.359 | 44.061 | 39.492 | 10.371 | 14410.30 | 12915.700 | 10.372 |
| 327.05 | 0.997   | 13.832 | 14.573  | -5.359 | 44.106 | 39.493 | 10.460 | 14469.00 | 12955.600 | 10.460 |
| 328.05 | 0.997   | 13.832 | 14.573  | -5.360 | 44.106 | 39.493 | 10.458 | 14513.10 | 12995.200 | 10.459 |
| 329.05 | 0.997   | 13.832 | 14.573  | -5.361 | 44.106 | 39.494 | 10.457 | 14557.20 | 13035.100 | 10.456 |
| 330.05 | 0.997   | 13.832 | 14.573  | -5.362 | 44.106 | 39.495 | 10.455 | 14601.30 | 13074.700 | 10.456 |
| 331.05 | 0.997   | 13.832 | 14.573  | -5.363 | 44.106 | 39.496 | 10.454 | 14645.40 | 13114.500 | 10.453 |
| 332.05 | 0.997   | 13.832 | 14.574  | -5.364 | 44.106 | 39.496 | 10.452 | 14689.50 | 13154.300 | 10.451 |
| 333.05 | 0.997   | 13.832 | 14.574  | -5.365 | 44.106 | 39.497 | 10.450 | 14733.70 | 13193.900 | 10.451 |
| 334.05 | 0.997   | 13.832 | 14.574  | -5.366 | 44.106 | 39.498 | 10.449 | 14777.80 | 13233.600 | 10.449 |
| 335.05 | 0.997   | 13.832 | 14.574  | -5.367 | 44.106 | 39.498 | 10.447 | 14821.90 | 13273.300 | 10.448 |
| 336.05 | 0.997   | 13.832 | 14.574  | -5.368 | 44.106 | 39.499 | 10.446 | 14866.00 | 13313.000 | 10.446 |
| 337.05 | 0.997   | 13.832 | 14.574  | -5.369 | 44.106 | 39.500 | 10.444 | 14910.10 | 13353.000 | 10.443 |
| 338.05 | 0.997   | 13.832 | 14.574  | -5.369 | 44.152 | 39.500 | 10.534 | 14969.60 | 13392.600 | 10.534 |
| 339.05 | 0.997   | 13.832 | 14.574  | -5.370 | 44.152 | 39.501 | 10.533 | 15013.70 | 13432.500 | 10.532 |
| 340.05 | 0.997   | 13.832 | 14.575  | -5.371 | 44.152 | 39.502 | 10.531 | 15057.90 | 13472.000 | 10.532 |
| 341.05 | 0.997   | 13.832 | 14.575  | -5.372 | 44.152 | 39.502 | 10.530 | 15102.00 | 13511.800 | 10.530 |
| 342.05 | 0.997   | 13.832 | 14.575  | -5.372 | 44.152 | 39.503 | 10.528 | 15146.20 | 13551.600 | 10.528 |
| 343.05 | 0.997   | 13.832 | 14.575  | -5.373 | 44.152 | 39.504 | 10.527 | 15190.30 | 13591.200 | 10.527 |
| 344.05 | 0.997   | 13.832 | 14.575  | -5.374 | 44.152 | 39.505 | 10.525 | 15234.50 | 13630.900 | 10.526 |
| 345.05 | 0.997   | 13.832 | 14.575  | -5.375 | 44.152 | 39.505 | 10.524 | 15278.60 | 13670.800 | 10.524 |
| 346.05 | 0.997   | 13.832 | 14.575  | -5.376 | 44.152 | 39.506 | 10.522 | 15322.80 | 13710.600 | 10.522 |
| 347.05 | 0.997   | 13.832 | 14.575  | -5.377 | 44.152 | 39.506 | 10.521 | 15366.90 | 13750.300 | 10.520 |
| 348.05 | 0.997   | 13.832 | 14.576  | -5.378 | 44.152 | 39.507 | 10.519 | 15411.10 | 13790.100 | 10.519 |
| 349.05 | 0.997   | 13.832 | 14.576  | -5.379 | 44.152 | 39.508 | 10.518 | 15455.20 | 13829.700 | 10.518 |
| 350.05 | 0.997   | 13.832 | 14.576  | -5.378 | 44.198 | 39.508 | 10.610 | 15515.60 | 13869.300 | 10.611 |
| 351.05 | 0.997   | 13.832 | 14.576  | -5.379 | 44.198 | 39.509 | 10.608 | 15559.80 | 13909.100 | 10.609 |
| 352.05 | 0.997   | 13.832 | 14.576  | -5.380 | 44.198 | 39.510 | 10.607 | 15604.00 | 13948.800 | 10.607 |
| 353.05 | 0.997   | 13.832 | 14.576  | -5.381 | 44.198 | 39.510 | 10.605 | 15648.20 | 13988.500 | 10.606 |
| 354.05 | 0.997   | 13.832 | 14.576  | -5.382 | 44.198 | 39.511 | 10.604 | 15692.40 | 14028.400 | 10.604 |
| 355.05 | 0.997   | 13.832 | 14.576  | -5.383 | 44.198 | 39.512 | 10.603 | 15736.60 | 14068.200 | 10.602 |
| 356.05 | 0.997   | 13.832 | 14.577  | -5.384 | 44.198 | 39.512 | 10.601 | 15780.70 | 14107.900 | 10.600 |
| 357.05 | 0.997   | 13.832 | 14.577  | -5.384 | 44.198 | 39.513 | 10.600 | 15824.90 | 14147.600 | 10.599 |
| 358.05 | 0.997   | 13.832 | 14.577  | -5.385 | 44.198 | 39.513 | 10.598 | 15869.10 | 14187.200 | 10.599 |
| 359.05 | 0.997   | 13.832 | 14.577  | -5.386 | 44.198 | 39.514 | 10.597 | 15913.30 | 14227.000 | 10.597 |
| 360.05 | 0.997   | 13.832 | 14.577  | -5.387 | 44.198 | 39.515 | 10.596 | 15957.50 | 14266.700 | 10.596 |
| 361.05 | 0.997   | 13.832 | 14.577  | -5.388 | 44.198 | 39.515 | 10.594 | 16001.70 | 14306.300 | 10.595 |
| 362.05 | 0.997   | 13.832 | 14.577  | -5.388 | 44.198 | 39.516 | 10.593 | 16045.90 | 14346.200 | 10.593 |
| 363.05 | 0.997   | 13.832 | 14.577  | -5.388 | 44.244 | 39.516 | 10.686 | 16107.20 | 14385.900 | 10.686 |

| Z      | $z/(1+z)$ | LTD LC | LTD HHC | %Error | CD LC  | CD HHC | %Error | LD LC    | LD HHC    | %Error |
|--------|-----------|--------|---------|--------|--------|--------|--------|----------|-----------|--------|
| (1)    | (2)       | (3)    | (4)     | (5)    | (6)    | (7)    | (8)    | (9)      | (10)      | (11)   |
| 364.05 | 0.997     | 13.832 | 14.577  | -5.389 | 44.244 | 39.517 | 10.685 | 16151.40 | 14425.600 | 10.685 |
| 365.05 | 0.997     | 13.832 | 14.578  | -5.390 | 44.244 | 39.518 | 10.683 | 16195.70 | 14465.500 | 10.683 |
| 366.05 | 0.997     | 13.832 | 14.578  | -5.391 | 44.244 | 39.518 | 10.682 | 16239.90 | 14505.200 | 10.682 |
| 367.05 | 0.997     | 13.832 | 14.578  | -5.391 | 44.244 | 39.519 | 10.681 | 16284.20 | 14544.900 | 10.681 |
| 368.05 | 0.997     | 13.832 | 14.578  | -5.392 | 44.244 | 39.519 | 10.679 | 16328.40 | 14584.500 | 10.680 |
| 369.05 | 0.997     | 13.832 | 14.578  | -5.393 | 44.244 | 39.520 | 10.678 | 16372.70 | 14624.300 | 10.679 |
| 370.05 | 0.997     | 13.832 | 14.578  | -5.394 | 44.244 | 39.521 | 10.677 | 16416.90 | 14663.900 | 10.678 |
| 371.05 | 0.997     | 13.832 | 14.578  | -5.394 | 44.244 | 39.521 | 10.676 | 16461.10 | 14703.800 | 10.676 |
| 372.05 | 0.997     | 13.832 | 14.578  | -5.395 | 44.244 | 39.522 | 10.674 | 16505.40 | 14743.600 | 10.674 |
| 373.05 | 0.997     | 13.832 | 14.578  | -5.396 | 44.244 | 39.522 | 10.673 | 16549.60 | 14783.300 | 10.673 |
| 374.05 | 0.997     | 13.832 | 14.578  | -5.397 | 44.244 | 39.523 | 10.672 | 16593.90 | 14823.100 | 10.671 |
| 375.05 | 0.997     | 13.832 | 14.579  | -5.398 | 44.244 | 39.523 | 10.670 | 16638.10 | 14862.900 | 10.670 |
| 376.05 | 0.997     | 13.832 | 14.579  | -5.398 | 44.244 | 39.524 | 10.669 | 16682.40 | 14902.500 | 10.669 |
| 377.05 | 0.997     | 13.832 | 14.579  | -5.398 | 44.292 | 39.525 | 10.764 | 16744.60 | 14942.300 | 10.763 |
| 378.05 | 0.997     | 13.832 | 14.579  | -5.399 | 44.292 | 39.525 | 10.763 | 16788.90 | 14982.000 | 10.762 |
| 379.05 | 0.997     | 13.832 | 14.579  | -5.399 | 44.292 | 39.526 | 10.762 | 16833.20 | 15021.600 | 10.762 |
| 380.05 | 0.997     | 13.832 | 14.579  | -5.400 | 44.292 | 39.526 | 10.760 | 16877.50 | 15061.400 | 10.760 |
| 381.05 | 0.997     | 13.832 | 14.579  | -5.401 | 44.292 | 39.527 | 10.759 | 16921.80 | 15101.000 | 10.760 |
| 382.05 | 0.997     | 13.832 | 14.579  | -5.402 | 44.292 | 39.527 | 10.758 | 16966.10 | 15140.900 | 10.758 |
| 383.05 | 0.997     | 13.832 | 14.579  | -5.402 | 44.292 | 39.528 | 10.757 | 17010.40 | 15180.600 | 10.757 |
| 384.05 | 0.997     | 13.832 | 14.580  | -5.403 | 44.292 | 39.528 | 10.755 | 17054.70 | 15220.200 | 10.756 |
| 385.05 | 0.997     | 13.832 | 14.580  | -5.404 | 44.292 | 39.529 | 10.754 | 17098.90 | 15260.000 | 10.755 |
| 386.05 | 0.997     | 13.832 | 14.580  | -5.405 | 44.292 | 39.529 | 10.753 | 17143.20 | 15300.000 | 10.752 |
| 387.05 | 0.997     | 13.832 | 14.580  | -5.405 | 44.292 | 39.530 | 10.752 | 17187.50 | 15339.500 | 10.753 |
| 388.05 | 0.997     | 13.832 | 14.580  | -5.406 | 44.292 | 39.530 | 10.751 | 17231.80 | 15379.100 | 10.752 |
| 389.05 | 0.997     | 13.832 | 14.580  | -5.407 | 44.292 | 39.531 | 10.749 | 17276.10 | 15419.000 | 10.749 |
| 390.05 | 0.997     | 13.832 | 14.580  | -5.407 | 44.292 | 39.531 | 10.748 | 17320.40 | 15458.800 | 10.748 |
| 391.05 | 0.997     | 13.832 | 14.580  | -5.408 | 44.292 | 39.532 | 10.747 | 17364.70 | 15498.300 | 10.748 |
| 392.05 | 0.997     | 13.832 | 14.580  | -5.408 | 44.341 | 39.533 | 10.844 | 17428.00 | 15538.100 | 10.844 |
| 393.05 | 0.997     | 13.832 | 14.580  | -5.408 | 44.341 | 39.533 | 10.842 | 17472.40 | 15578.100 | 10.842 |
| 394.05 | 0.997     | 13.832 | 14.580  | -5.409 | 44.341 | 39.534 | 10.841 | 17516.70 | 15617.600 | 10.842 |
| 395.05 | 0.997     | 13.832 | 14.581  | -5.410 | 44.341 | 39.534 | 10.840 | 17561.10 | 15657.600 | 10.839 |
| 396.05 | 0.997     | 13.832 | 14.581  | -5.410 | 44.341 | 39.535 | 10.839 | 17605.40 | 15697.000 | 10.840 |
| 397.05 | 0.997     | 13.832 | 14.581  | -5.411 | 44.341 | 39.535 | 10.838 | 17649.70 | 15736.700 | 10.839 |
| 398.05 | 0.997     | 13.832 | 14.581  | -5.412 | 44.341 | 39.536 | 10.837 | 17694.10 | 15776.600 | 10.837 |
| 399.05 | 0.998     | 13.832 | 14.581  | -5.412 | 44.341 | 39.536 | 10.836 | 17738.40 | 15816.300 | 10.836 |
| 400.05 | 0.998     | 13.832 | 14.581  | -5.413 | 44.341 | 39.537 | 10.834 | 17782.80 | 15856.200 | 10.834 |
| 401.05 | 0.998     | 13.832 | 14.581  | -5.414 | 44.341 | 39.537 | 10.833 | 17827.10 | 15895.900 | 10.833 |
| 402.05 | 0.998     | 13.832 | 14.581  | -5.414 | 44.341 | 39.538 | 10.832 | 17871.40 | 15935.400 | 10.833 |
| 403.05 | 0.998     | 13.832 | 14.581  | -5.415 | 44.341 | 39.538 | 10.831 | 17915.80 | 15975.200 | 10.832 |
| 404.05 | 0.998     | 13.832 | 14.581  | -5.416 | 44.341 | 39.538 | 10.830 | 17960.10 | 16015.100 | 10.830 |
| 405.05 | 0.998     | 13.832 | 14.581  | -5.416 | 44.341 | 39.539 | 10.829 | 18004.50 | 16054.800 | 10.829 |
| 406.05 | 0.998     | 13.832 | 14.582  | -5.417 | 44.341 | 39.539 | 10.828 | 18048.80 | 16094.400 | 10.829 |
| 407.05 | 0.998     | 13.832 | 14.582  | -5.418 | 44.341 | 39.540 | 10.827 | 18093.10 | 16134.100 | 10.828 |
| 408.05 | 0.998     | 13.832 | 14.582  | -5.417 | 44.390 | 39.540 | 10.925 | 18137.40 | 16174.000 | 10.925 |
| 409.05 | 0.998     | 13.832 | 14.582  | -5.418 | 44.390 | 39.541 | 10.924 | 18181.70 | 16213.700 | 10.924 |
| 410.05 | 0.998     | 13.832 | 14.582  | -5.419 | 44.390 | 39.541 | 10.923 | 18226.00 | 16253.300 | 10.924 |
| 411.05 | 0.998     | 13.832 | 14.582  | -5.419 | 44.390 | 39.542 | 10.922 | 18270.30 | 16293.000 | 10.921 |
| 412.05 | 0.998     | 13.832 | 14.582  | -5.420 | 44.390 | 39.542 | 10.921 | 18314.60 | 16332.900 | 10.921 |
| 413.05 | 0.998     | 13.832 | 14.582  | -5.420 | 44.390 | 39.543 | 10.920 | 18358.90 | 16372.600 | 10.920 |
| 414.05 | 0.998     | 13.832 | 14.582  | -5.421 | 44.390 | 39.543 | 10.919 | 18403.20 | 16412.400 | 10.918 |
| 415.05 | 0.998     | 13.832 | 14.582  | -5.422 | 44.390 | 39.544 | 10.918 | 18447.50 | 16452.100 | 10.918 |
| 416.05 | 0.998     | 13.832 | 14.582  | -5.422 | 44.390 | 39.544 | 10.916 | 18491.80 | 16492.000 | 10.916 |
| 417.05 | 0.998     | 13.832 | 14.583  | -5.423 | 44.390 | 39.545 | 10.915 | 18536.10 | 16531.600 | 10.915 |
| 418.05 | 0.998     | 13.832 | 14.583  | -5.424 | 44.390 | 39.545 | 10.914 | 18580.40 | 16571.400 | 10.914 |
| 419.05 | 0.998     | 13.832 | 14.583  | -5.424 | 44.390 | 39.545 | 10.913 | 18624.70 | 16611.100 | 10.913 |
| 420.05 | 0.998     | 13.832 | 14.583  | -5.425 | 44.390 | 39.546 | 10.912 | 18669.00 | 16650.800 | 10.912 |
| 421.05 | 0.998     | 13.832 | 14.583  | -5.425 | 44.390 | 39.546 | 10.911 | 18713.30 | 16690.400 | 10.912 |
| 422.05 | 0.998     | 13.832 | 14.583  | -5.426 | 44.390 | 39.547 | 10.910 | 18757.60 | 16730.200 | 10.911 |
| 423.05 | 0.998     | 13.832 | 14.583  | -5.426 | 44.390 | 39.547 | 10.909 | 18801.90 | 16770.100 | 10.909 |
| 424.05 | 0.998     | 13.832 | 14.583  | -5.427 | 44.390 | 39.548 | 10.908 | 18846.20 | 16809.800 | 10.908 |
| 425.05 | 0.998     | 13.833 | 14.583  | -5.427 | 44.440 | 39.548 | 11.008 | 18890.50 | 16849.200 | 11.009 |
| 426.05 | 0.998     | 13.833 | 14.583  | -5.427 | 44.440 | 39.549 | 11.007 | 18934.80 | 16888.900 | 11.007 |
| 427.05 | 0.998     | 13.833 | 14.583  | -5.428 | 44.440 | 39.549 | 11.006 | 18979.10 | 16928.700 | 11.007 |
| 428.05 | 0.998     | 13.833 | 14.583  | -5.428 | 44.440 | 39.549 | 11.005 | 19023.40 | 16968.500 | 11.005 |
| 429.05 | 0.998     | 13.833 | 14.583  | -5.429 | 44.440 | 39.550 | 11.004 | 19067.70 | 17008.300 | 11.004 |
| 430.05 | 0.998     | 13.833 | 14.584  | -5.430 | 44.440 | 39.550 | 11.003 | 19112.00 | 17048.100 | 11.004 |

| Z      | $z/(1+z)$ | LTD LC | LTD HHC | %Error | CD LC  | CD HHC | %Error | LD LC    | LD HHC    | %Error |
|--------|-----------|--------|---------|--------|--------|--------|--------|----------|-----------|--------|
| (1)    | (2)       | (3)    | (4)     | (5)    | (6)    | (7)    | (8)    | (9)      | (10)      | (11)   |
| 431.05 | 0.998     | 13.833 | 14.584  | -5.430 | 44.440 | 39.551 | 11.002 | 19200.30 | 17087.700 | 11.003 |
| 432.05 | 0.998     | 13.833 | 14.584  | -5.431 | 44.440 | 39.551 | 11.001 | 19244.80 | 17127.600 | 11.001 |
| 433.05 | 0.998     | 13.833 | 14.584  | -5.431 | 44.440 | 39.552 | 11.001 | 19289.20 | 17167.200 | 11.001 |
| 434.05 | 0.998     | 13.833 | 14.584  | -5.432 | 44.440 | 39.552 | 11.000 | 19333.70 | 17207.000 | 11.000 |
| 435.05 | 0.998     | 13.833 | 14.584  | -5.432 | 44.440 | 39.552 | 10.999 | 19378.10 | 17247.000 | 10.998 |
| 436.05 | 0.998     | 13.833 | 14.584  | -5.433 | 44.440 | 39.553 | 10.998 | 19422.60 | 17286.700 | 10.997 |
| 437.05 | 0.998     | 13.833 | 14.584  | -5.434 | 44.440 | 39.553 | 10.997 | 19467.00 | 17326.200 | 10.997 |
| 438.05 | 0.998     | 13.833 | 14.584  | -5.434 | 44.440 | 39.554 | 10.996 | 19511.40 | 17365.800 | 10.997 |
| 439.05 | 0.998     | 13.833 | 14.584  | -5.435 | 44.440 | 39.554 | 10.995 | 19555.90 | 17405.600 | 10.996 |
| 440.05 | 0.998     | 13.833 | 14.584  | -5.435 | 44.440 | 39.554 | 10.994 | 19600.30 | 17445.600 | 10.993 |
| 441.05 | 0.998     | 13.833 | 14.584  | -5.436 | 44.440 | 39.555 | 10.993 | 19644.80 | 17485.300 | 10.993 |
| 442.05 | 0.998     | 13.833 | 14.584  | -5.436 | 44.440 | 39.555 | 10.992 | 19689.20 | 17524.700 | 10.993 |
| 443.05 | 0.998     | 13.833 | 14.585  | -5.437 | 44.440 | 39.556 | 10.991 | 19733.60 | 17564.800 | 10.991 |
| 444.05 | 0.998     | 13.833 | 14.585  | -5.436 | 44.491 | 39.556 | 11.093 | 19800.90 | 17604.600 | 11.092 |
| 445.05 | 0.998     | 13.833 | 14.585  | -5.437 | 44.491 | 39.556 | 11.092 | 19845.40 | 17644.100 | 11.092 |
| 446.05 | 0.998     | 13.833 | 14.585  | -5.438 | 44.491 | 39.557 | 11.091 | 19889.90 | 17683.700 | 11.092 |
| 447.05 | 0.998     | 13.833 | 14.585  | -5.438 | 44.491 | 39.557 | 11.090 | 19934.30 | 17723.600 | 11.090 |
| 448.05 | 0.998     | 13.833 | 14.585  | -5.439 | 44.491 | 39.558 | 11.089 | 19978.80 | 17763.100 | 11.090 |
| 449.05 | 0.998     | 13.833 | 14.585  | -5.439 | 44.491 | 39.558 | 11.088 | 20023.30 | 17802.900 | 11.089 |
| 450.05 | 0.998     | 13.833 | 14.585  | -5.440 | 44.491 | 39.558 | 11.088 | 20067.80 | 17842.800 | 11.088 |
| 451.05 | 0.998     | 13.833 | 14.585  | -5.440 | 44.491 | 39.559 | 11.087 | 20112.30 | 17882.400 | 11.088 |
| 452.05 | 0.998     | 13.833 | 14.585  | -5.441 | 44.491 | 39.559 | 11.086 | 20156.80 | 17922.100 | 11.086 |
| 453.05 | 0.998     | 13.833 | 14.585  | -5.441 | 44.491 | 39.560 | 11.085 | 20201.30 | 17962.100 | 11.085 |
| 454.05 | 0.998     | 13.833 | 14.585  | -5.442 | 44.491 | 39.560 | 11.084 | 20245.80 | 18001.700 | 11.084 |
| 455.05 | 0.998     | 13.833 | 14.585  | -5.442 | 44.491 | 39.560 | 11.083 | 20290.30 | 18041.500 | 11.083 |
| 456.05 | 0.998     | 13.833 | 14.585  | -5.443 | 44.491 | 39.561 | 11.082 | 20334.80 | 18081.000 | 11.083 |
| 457.05 | 0.998     | 13.833 | 14.586  | -5.443 | 44.491 | 39.561 | 11.081 | 20379.30 | 18121.200 | 11.080 |
| 458.05 | 0.998     | 13.833 | 14.586  | -5.444 | 44.491 | 39.561 | 11.081 | 20423.80 | 18160.500 | 11.081 |
| 459.05 | 0.998     | 13.833 | 14.586  | -5.444 | 44.491 | 39.562 | 11.080 | 20468.20 | 18200.500 | 11.079 |
| 460.05 | 0.998     | 13.833 | 14.586  | -5.445 | 44.491 | 39.562 | 11.079 | 20512.70 | 18240.200 | 11.079 |
| 461.05 | 0.998     | 13.833 | 14.586  | -5.445 | 44.491 | 39.563 | 11.078 | 20557.20 | 18280.100 | 11.077 |
| 462.05 | 0.998     | 13.833 | 14.586  | -5.446 | 44.491 | 39.563 | 11.077 | 20601.70 | 18319.600 | 11.077 |
| 463.05 | 0.998     | 13.833 | 14.586  | -5.446 | 44.491 | 39.563 | 11.076 | 20646.20 | 18359.300 | 11.077 |
| 464.05 | 0.998     | 13.833 | 14.586  | -5.447 | 44.491 | 39.564 | 11.076 | 20690.70 | 18399.200 | 11.075 |
| 465.05 | 0.998     | 13.833 | 14.586  | -5.446 | 44.544 | 39.564 | 11.179 | 20735.60 | 18438.700 | 11.180 |
| 466.05 | 0.998     | 13.833 | 14.586  | -5.447 | 44.544 | 39.564 | 11.178 | 20804.10 | 18478.400 | 11.179 |
| 467.05 | 0.998     | 13.833 | 14.586  | -5.447 | 44.544 | 39.565 | 11.178 | 20848.60 | 18518.200 | 11.178 |
| 468.05 | 0.998     | 13.833 | 14.586  | -5.448 | 44.544 | 39.565 | 11.177 | 20893.20 | 18557.800 | 11.178 |
| 469.05 | 0.998     | 13.833 | 14.586  | -5.448 | 44.544 | 39.566 | 11.176 | 20937.70 | 18598.000 | 11.175 |
| 470.05 | 0.998     | 13.833 | 14.586  | -5.449 | 44.544 | 39.566 | 11.175 | 20982.30 | 18637.300 | 11.176 |
| 471.05 | 0.998     | 13.833 | 14.587  | -5.449 | 44.544 | 39.566 | 11.174 | 21026.80 | 18677.300 | 11.174 |
| 472.05 | 0.998     | 13.833 | 14.587  | -5.450 | 44.544 | 39.567 | 11.174 | 21071.40 | 18717.000 | 11.173 |
| 473.05 | 0.998     | 13.833 | 14.587  | -5.450 | 44.544 | 39.567 | 11.173 | 21115.90 | 18756.800 | 11.172 |
| 474.05 | 0.998     | 13.833 | 14.587  | -5.451 | 44.544 | 39.567 | 11.172 | 21160.40 | 18796.300 | 11.173 |
| 475.05 | 0.998     | 13.833 | 14.587  | -5.451 | 44.544 | 39.568 | 11.171 | 21205.00 | 18835.900 | 11.172 |
| 476.05 | 0.998     | 13.833 | 14.587  | -5.452 | 44.544 | 39.568 | 11.170 | 21249.50 | 18875.700 | 11.171 |
| 477.05 | 0.998     | 13.833 | 14.587  | -5.452 | 44.544 | 39.568 | 11.170 | 21294.10 | 18915.700 | 11.169 |
| 478.05 | 0.998     | 13.833 | 14.587  | -5.452 | 44.544 | 39.569 | 11.169 | 21338.60 | 18955.300 | 11.169 |
| 479.05 | 0.998     | 13.833 | 14.587  | -5.453 | 44.544 | 39.569 | 11.168 | 21383.20 | 18995.000 | 11.168 |
| 480.05 | 0.998     | 13.833 | 14.587  | -5.453 | 44.544 | 39.569 | 11.167 | 21427.70 | 19035.000 | 11.167 |
| 481.05 | 0.998     | 13.833 | 14.587  | -5.454 | 44.544 | 39.570 | 11.167 | 21472.30 | 19074.500 | 11.167 |
| 482.05 | 0.998     | 13.833 | 14.587  | -5.454 | 44.544 | 39.570 | 11.166 | 21516.80 | 19114.200 | 11.166 |
| 483.05 | 0.998     | 13.833 | 14.587  | -5.455 | 44.544 | 39.570 | 11.165 | 21561.30 | 19154.100 | 11.165 |
| 484.05 | 0.998     | 13.833 | 14.587  | -5.455 | 44.544 | 39.571 | 11.164 | 21605.90 | 19193.600 | 11.165 |
| 485.05 | 0.998     | 13.833 | 14.587  | -5.456 | 44.544 | 39.571 | 11.163 | 21650.40 | 19233.800 | 11.162 |
| 486.05 | 0.998     | 13.833 | 14.587  | -5.456 | 44.544 | 39.571 | 11.163 | 21695.00 | 19273.000 | 11.164 |
| 487.05 | 0.998     | 13.833 | 14.588  | -5.456 | 44.597 | 39.572 | 11.268 | 21765.60 | 19313.000 | 11.268 |
| 488.05 | 0.998     | 13.833 | 14.588  | -5.456 | 44.597 | 39.572 | 11.268 | 21810.20 | 19352.500 | 11.268 |
| 489.05 | 0.998     | 13.833 | 14.588  | -5.457 | 44.597 | 39.572 | 11.267 | 21854.80 | 19392.300 | 11.268 |
| 490.05 | 0.998     | 13.833 | 14.588  | -5.457 | 44.597 | 39.573 | 11.266 | 21899.40 | 19432.200 | 11.266 |
| 491.05 | 0.998     | 13.833 | 14.588  | -5.457 | 44.597 | 39.573 | 11.265 | 21944.00 | 19471.700 | 11.266 |
| 492.05 | 0.998     | 13.833 | 14.588  | -5.458 | 44.597 | 39.573 | 11.265 | 21988.60 | 19511.900 | 11.264 |
| 493.05 | 0.998     | 13.833 | 14.588  | -5.458 | 44.597 | 39.574 | 11.264 | 22033.20 | 19551.100 | 11.265 |
| 494.05 | 0.998     | 13.833 | 14.588  | -5.459 | 44.597 | 39.574 | 11.263 | 22077.70 | 19591.100 | 11.263 |
| 495.05 | 0.998     | 13.833 | 14.588  | -5.459 | 44.597 | 39.574 | 11.262 | 22122.30 | 19630.600 | 11.263 |
| 496.05 | 0.998     | 13.833 | 14.588  | -5.460 | 44.597 | 39.575 | 11.262 | 22166.90 | 19670.300 | 11.263 |
| 497.05 | 0.998     | 13.833 | 14.588  | -5.460 | 44.597 | 39.575 | 11.261 | 22211.50 | 19710.200 | 11.262 |

| Z      | z/(1+z) | LTD LC | LTD HHC | %Error | CD LC  | CD HHC | %Error | LD LC    | LD HHC    | %Error |
|--------|---------|--------|---------|--------|--------|--------|--------|----------|-----------|--------|
| (1)    | (2)     | (3)    | (4)     | (5)    | (6)    | (7)    | (8)    | (9)      | (10)      | (11)   |
| 498.05 | 0.998   | 13.833 | 14.588  | -5.460 | 44.597 | 39.575 | 11.260 | 22256.10 | 19750.200 | 11.259 |
| 499.05 | 0.998   | 13.833 | 14.588  | -5.461 | 44.597 | 39.576 | 11.260 | 22300.70 | 19789.800 | 11.259 |
| 500.05 | 0.998   | 13.833 | 14.588  | -5.461 | 44.597 | 39.576 | 11.259 | 22345.30 | 19829.600 | 11.259 |
| 501.05 | 0.998   | 13.833 | 14.588  | -5.462 | 44.597 | 39.576 | 11.258 | 22389.90 | 19869.500 | 11.257 |
| 502.05 | 0.998   | 13.833 | 14.588  | -5.462 | 44.597 | 39.577 | 11.257 | 22434.50 | 19909.000 | 11.257 |
| 503.05 | 0.998   | 13.833 | 14.588  | -5.463 | 44.597 | 39.577 | 11.257 | 22479.10 | 19948.600 | 11.257 |
| 504.05 | 0.998   | 13.833 | 14.589  | -5.463 | 44.597 | 39.577 | 11.256 | 22523.70 | 19988.400 | 11.256 |
| 505.05 | 0.998   | 13.833 | 14.589  | -5.463 | 44.597 | 39.578 | 11.255 | 22568.30 | 20028.300 | 11.255 |
| 506.05 | 0.998   | 13.833 | 14.589  | -5.464 | 44.597 | 39.578 | 11.255 | 22612.90 | 20067.800 | 11.255 |
| 507.05 | 0.998   | 13.833 | 14.589  | -5.464 | 44.597 | 39.578 | 11.254 | 22657.50 | 20107.500 | 11.255 |
| 508.05 | 0.998   | 13.833 | 14.589  | -5.465 | 44.597 | 39.578 | 11.253 | 22702.10 | 20147.300 | 11.254 |
| 509.05 | 0.998   | 13.833 | 14.589  | -5.465 | 44.597 | 39.579 | 11.253 | 22746.70 | 20187.300 | 11.252 |
| 510.05 | 0.998   | 13.833 | 14.589  | -5.465 | 44.597 | 39.579 | 11.252 | 22791.30 | 20226.800 | 11.252 |
| 511.05 | 0.998   | 13.833 | 14.589  | -5.466 | 44.597 | 39.579 | 11.251 | 22835.90 | 20266.500 | 11.252 |
| 512.05 | 0.998   | 13.833 | 14.589  | -5.465 | 44.652 | 39.580 | 11.359 | 22908.50 | 20306.300 | 11.359 |
| 513.05 | 0.998   | 13.833 | 14.589  | -5.466 | 44.652 | 39.580 | 11.358 | 22953.10 | 20346.200 | 11.357 |
| 514.05 | 0.998   | 13.833 | 14.589  | -5.466 | 44.652 | 39.580 | 11.358 | 22997.80 | 20385.800 | 11.358 |
| 515.05 | 0.998   | 13.833 | 14.589  | -5.467 | 44.652 | 39.581 | 11.357 | 23042.40 | 20425.400 | 11.357 |
| 516.05 | 0.998   | 13.833 | 14.589  | -5.467 | 44.652 | 39.581 | 11.356 | 23087.10 | 20465.200 | 11.356 |
| 517.05 | 0.998   | 13.833 | 14.589  | -5.467 | 44.652 | 39.581 | 11.356 | 23131.70 | 20505.200 | 11.355 |
| 518.05 | 0.998   | 13.833 | 14.589  | -5.468 | 44.652 | 39.581 | 11.355 | 23176.40 | 20544.700 | 11.355 |
| 519.05 | 0.998   | 13.833 | 14.589  | -5.468 | 44.652 | 39.582 | 11.354 | 23221.00 | 20584.300 | 11.355 |
| 520.05 | 0.998   | 13.833 | 14.589  | -5.469 | 44.652 | 39.582 | 11.354 | 23265.70 | 20624.100 | 11.354 |
| 521.05 | 0.998   | 13.833 | 14.589  | -5.469 | 44.652 | 39.582 | 11.353 | 23310.30 | 20664.000 | 11.353 |
| 522.05 | 0.998   | 13.833 | 14.590  | -5.469 | 44.652 | 39.583 | 11.352 | 23355.00 | 20703.500 | 11.353 |
| 523.05 | 0.998   | 13.833 | 14.590  | -5.470 | 44.652 | 39.583 | 11.352 | 23399.70 | 20743.100 | 11.353 |
| 524.05 | 0.998   | 13.833 | 14.590  | -5.470 | 44.652 | 39.583 | 11.351 | 23444.30 | 20782.800 | 11.352 |
| 525.05 | 0.998   | 13.833 | 14.590  | -5.471 | 44.652 | 39.583 | 11.350 | 23489.00 | 20822.700 | 11.351 |
| 526.05 | 0.998   | 13.833 | 14.590  | -5.471 | 44.652 | 39.584 | 11.350 | 23533.60 | 20862.800 | 11.349 |
| 527.05 | 0.998   | 13.833 | 14.590  | -5.471 | 44.652 | 39.584 | 11.349 | 23578.30 | 20902.300 | 11.349 |
| 528.05 | 0.998   | 13.833 | 14.590  | -5.472 | 44.652 | 39.584 | 11.349 | 23622.90 | 20942.000 | 11.349 |
| 529.05 | 0.998   | 13.833 | 14.590  | -5.472 | 44.652 | 39.585 | 11.348 | 23667.60 | 20981.900 | 11.348 |
| 530.05 | 0.998   | 13.833 | 14.590  | -5.472 | 44.652 | 39.585 | 11.347 | 23712.20 | 21021.200 | 11.349 |
| 531.05 | 0.998   | 13.833 | 14.590  | -5.473 | 44.652 | 39.585 | 11.347 | 23756.90 | 21061.400 | 11.346 |
| 532.05 | 0.998   | 13.833 | 14.590  | -5.473 | 44.652 | 39.585 | 11.346 | 23801.50 | 21101.000 | 11.346 |
| 533.05 | 0.998   | 13.833 | 14.590  | -5.474 | 44.652 | 39.586 | 11.345 | 23846.20 | 21140.800 | 11.345 |
| 534.05 | 0.998   | 13.833 | 14.590  | -5.474 | 44.652 | 39.586 | 11.345 | 23890.80 | 21180.700 | 11.344 |
| 535.05 | 0.998   | 13.833 | 14.590  | -5.474 | 44.652 | 39.586 | 11.344 | 23935.50 | 21220.100 | 11.345 |
| 536.05 | 0.998   | 13.833 | 14.590  | -5.475 | 44.652 | 39.587 | 11.344 | 23980.10 | 21259.600 | 11.345 |
| 537.05 | 0.998   | 13.833 | 14.590  | -5.475 | 44.652 | 39.587 | 11.343 | 24024.80 | 21299.300 | 11.344 |
| 538.05 | 0.998   | 13.833 | 14.590  | -5.475 | 44.652 | 39.587 | 11.342 | 24069.40 | 21339.200 | 11.343 |
| 539.05 | 0.998   | 13.833 | 14.590  | -5.476 | 44.652 | 39.587 | 11.342 | 24114.10 | 21379.200 | 11.342 |
| 540.05 | 0.998   | 13.833 | 14.590  | -5.475 | 44.707 | 39.588 | 11.452 | 24188.90 | 21418.600 | 11.453 |
| 541.05 | 0.998   | 13.833 | 14.591  | -5.476 | 44.707 | 39.588 | 11.451 | 24233.60 | 21458.900 | 11.450 |
| 542.05 | 0.998   | 13.833 | 14.591  | -5.476 | 44.707 | 39.588 | 11.451 | 24278.30 | 21498.600 | 11.449 |
| 543.05 | 0.998   | 13.833 | 14.591  | -5.476 | 44.707 | 39.588 | 11.450 | 24323.00 | 21537.800 | 11.451 |
| 544.05 | 0.998   | 13.833 | 14.591  | -5.477 | 44.707 | 39.589 | 11.449 | 24367.80 | 21577.800 | 11.449 |
| 545.05 | 0.998   | 13.833 | 14.591  | -5.477 | 44.707 | 39.589 | 11.449 | 24412.50 | 21617.300 | 11.450 |
| 546.05 | 0.998   | 13.833 | 14.591  | -5.477 | 44.707 | 39.589 | 11.448 | 24457.20 | 21656.900 | 11.450 |
| 547.05 | 0.998   | 13.833 | 14.591  | -5.478 | 44.707 | 39.590 | 11.448 | 24501.90 | 21696.700 | 11.449 |
| 548.05 | 0.998   | 13.833 | 14.591  | -5.478 | 44.707 | 39.590 | 11.447 | 24546.60 | 21736.600 | 11.448 |
| 549.05 | 0.998   | 13.833 | 14.591  | -5.478 | 44.707 | 39.590 | 11.446 | 24591.30 | 21776.700 | 11.446 |
| 550.05 | 0.998   | 13.833 | 14.591  | -5.479 | 44.707 | 39.590 | 11.446 | 24636.00 | 21816.100 | 11.446 |
| 551.05 | 0.998   | 13.833 | 14.591  | -5.479 | 44.707 | 39.591 | 11.445 | 24680.70 | 21855.800 | 11.446 |
| 552.05 | 0.998   | 13.833 | 14.591  | -5.480 | 44.707 | 39.591 | 11.445 | 24725.40 | 21895.500 | 11.445 |
| 553.05 | 0.998   | 13.833 | 14.591  | -5.480 | 44.707 | 39.591 | 11.444 | 24770.10 | 21935.400 | 11.444 |
| 554.05 | 0.998   | 13.833 | 14.591  | -5.480 | 44.707 | 39.591 | 11.444 | 24814.80 | 21975.500 | 11.442 |
| 555.05 | 0.998   | 13.833 | 14.591  | -5.481 | 44.707 | 39.592 | 11.443 | 24859.50 | 22015.000 | 11.443 |
| 556.05 | 0.998   | 13.833 | 14.591  | -5.481 | 44.707 | 39.592 | 11.442 | 24904.20 | 22054.600 | 11.442 |
| 557.05 | 0.998   | 13.833 | 14.591  | -5.481 | 44.707 | 39.592 | 11.442 | 24949.00 | 22094.300 | 11.442 |
| 558.05 | 0.998   | 13.833 | 14.591  | -5.482 | 44.707 | 39.592 | 11.441 | 24993.70 | 22134.200 | 11.441 |
| 559.05 | 0.998   | 13.833 | 14.591  | -5.482 | 44.707 | 39.593 | 11.441 | 25038.40 | 22173.500 | 11.442 |
| 560.05 | 0.998   | 13.833 | 14.591  | -5.482 | 44.707 | 39.593 | 11.440 | 25083.10 | 22213.700 | 11.439 |
| 561.05 | 0.998   | 13.833 | 14.591  | -5.483 | 44.707 | 39.593 | 11.440 | 25127.80 | 22253.300 | 11.439 |
| 562.05 | 0.998   | 13.833 | 14.592  | -5.483 | 44.707 | 39.593 | 11.439 | 25172.50 | 22293.000 | 11.439 |
| 563.05 | 0.998   | 13.833 | 14.592  | -5.483 | 44.707 | 39.594 | 11.438 | 25217.20 | 22332.900 | 11.438 |
| 564.05 | 0.998   | 13.833 | 14.592  | -5.484 | 44.707 | 39.594 | 11.438 | 25261.90 | 22372.200 | 11.439 |

| Z      | z/(1+z) | LTD LC | LTD HHC | %Error | CD LC  | CD HHC | %Error | LD LC    | LD HHC    | %Error |
|--------|---------|--------|---------|--------|--------|--------|--------|----------|-----------|--------|
| (1)    | (2)     | (3)    | (4)     | (5)    | (6)    | (7)    | (8)    | (9)      | (10)      | (11)   |
| 565.05 | 0.998   | 13.833 | 14.592  | -5.484 | 44.707 | 39.594 | 11.437 | 25306.60 | 22412.300 | 11.437 |
| 566.05 | 0.998   | 13.833 | 14.592  | -5.484 | 44.707 | 39.594 | 11.437 | 25351.30 | 22451.800 | 11.437 |
| 567.05 | 0.998   | 13.833 | 14.592  | -5.485 | 44.707 | 39.595 | 11.436 | 25396.00 | 22491.500 | 11.437 |
| 568.05 | 0.998   | 13.833 | 14.592  | -5.485 | 44.707 | 39.595 | 11.436 | 25440.70 | 22531.300 | 11.436 |
| 569.05 | 0.998   | 13.833 | 14.592  | -5.485 | 44.707 | 39.595 | 11.435 | 25485.40 | 22571.300 | 11.435 |
| 570.05 | 0.998   | 13.833 | 14.592  | -5.486 | 44.707 | 39.595 | 11.435 | 25530.10 | 22610.600 | 11.436 |
| 571.05 | 0.998   | 13.833 | 14.592  | -5.485 | 44.765 | 39.596 | 11.547 | 25607.60 | 22650.800 | 11.546 |
| 572.05 | 0.998   | 13.833 | 14.592  | -5.485 | 44.765 | 39.596 | 11.547 | 25652.30 | 22690.400 | 11.546 |
| 573.05 | 0.998   | 13.833 | 14.592  | -5.486 | 44.765 | 39.596 | 11.546 | 25697.10 | 22730.100 | 11.546 |
| 574.05 | 0.998   | 13.833 | 14.592  | -5.486 | 44.765 | 39.596 | 11.546 | 25741.90 | 22770.000 | 11.545 |
| 575.05 | 0.998   | 13.833 | 14.592  | -5.486 | 44.765 | 39.597 | 11.545 | 25786.60 | 22809.200 | 11.546 |
| 576.05 | 0.998   | 13.833 | 14.592  | -5.487 | 44.765 | 39.597 | 11.544 | 25831.40 | 22849.400 | 11.544 |
| 577.05 | 0.998   | 13.833 | 14.592  | -5.487 | 44.765 | 39.597 | 11.544 | 25876.10 | 22888.900 | 11.545 |
| 578.05 | 0.998   | 13.833 | 14.592  | -5.487 | 44.765 | 39.597 | 11.543 | 25920.90 | 22928.500 | 11.544 |
| 579.05 | 0.998   | 13.833 | 14.592  | -5.488 | 44.765 | 39.597 | 11.543 | 25965.70 | 22968.300 | 11.544 |
| 580.05 | 0.998   | 13.833 | 14.592  | -5.488 | 44.765 | 39.598 | 11.542 | 26010.40 | 23008.200 | 11.542 |
| 581.05 | 0.998   | 13.833 | 14.592  | -5.488 | 44.765 | 39.598 | 11.542 | 26055.20 | 23048.200 | 11.541 |
| 582.05 | 0.998   | 13.833 | 14.592  | -5.489 | 44.765 | 39.598 | 11.541 | 26100.00 | 23087.600 | 11.542 |
| 583.05 | 0.998   | 13.833 | 14.592  | -5.489 | 44.765 | 39.598 | 11.541 | 26144.70 | 23127.200 | 11.542 |
| 584.05 | 0.998   | 13.833 | 14.592  | -5.489 | 44.765 | 39.599 | 11.540 | 26189.50 | 23166.800 | 11.542 |
| 585.05 | 0.998   | 13.833 | 14.593  | -5.490 | 44.765 | 39.599 | 11.540 | 26234.30 | 23206.600 | 11.541 |
| 586.05 | 0.998   | 13.833 | 14.593  | -5.490 | 44.765 | 39.599 | 11.539 | 26279.00 | 23246.500 | 11.540 |
| 587.05 | 0.998   | 13.833 | 14.593  | -5.490 | 44.765 | 39.599 | 11.539 | 26323.80 | 23286.600 | 11.538 |
| 588.05 | 0.998   | 13.833 | 14.593  | -5.490 | 44.765 | 39.600 | 11.538 | 26368.60 | 23326.000 | 11.539 |
| 589.05 | 0.998   | 13.833 | 14.593  | -5.491 | 44.765 | 39.600 | 11.538 | 26413.30 | 23365.500 | 11.539 |
| 590.05 | 0.998   | 13.833 | 14.593  | -5.491 | 44.765 | 39.600 | 11.537 | 26458.10 | 23405.900 | 11.536 |
| 591.05 | 0.998   | 13.833 | 14.593  | -5.491 | 44.765 | 39.600 | 11.537 | 26502.80 | 23445.700 | 11.535 |
| 592.05 | 0.998   | 13.833 | 14.593  | -5.492 | 44.765 | 39.600 | 11.536 | 26547.60 | 23484.800 | 11.537 |
| 593.05 | 0.998   | 13.833 | 14.593  | -5.492 | 44.765 | 39.601 | 11.536 | 26592.40 | 23524.900 | 11.535 |
| 594.05 | 0.998   | 13.833 | 14.593  | -5.492 | 44.765 | 39.601 | 11.535 | 26637.10 | 23564.200 | 11.536 |
| 595.05 | 0.998   | 13.833 | 14.593  | -5.493 | 44.765 | 39.601 | 11.535 | 26681.90 | 23604.500 | 11.534 |
| 596.05 | 0.998   | 13.833 | 14.593  | -5.493 | 44.765 | 39.601 | 11.534 | 26726.70 | 23644.100 | 11.534 |
| 597.05 | 0.998   | 13.833 | 14.593  | -5.493 | 44.765 | 39.602 | 11.534 | 26771.40 | 23683.900 | 11.533 |
| 598.05 | 0.998   | 13.833 | 14.593  | -5.493 | 44.765 | 39.602 | 11.533 | 26816.20 | 23723.800 | 11.532 |
| 599.05 | 0.998   | 13.833 | 14.593  | -5.494 | 44.765 | 39.602 | 11.533 | 26861.00 | 23762.900 | 11.534 |
| 600.05 | 0.998   | 13.833 | 14.593  | -5.494 | 44.765 | 39.602 | 11.532 | 26905.70 | 23803.100 | 11.532 |
| 601.05 | 0.998   | 13.833 | 14.593  | -5.494 | 44.765 | 39.602 | 11.532 | 26950.50 | 23842.500 | 11.532 |
| 602.05 | 0.998   | 13.833 | 14.593  | -5.495 | 44.765 | 39.603 | 11.531 | 26995.30 | 23882.000 | 11.533 |
| 603.05 | 0.998   | 13.833 | 14.593  | -5.495 | 44.765 | 39.603 | 11.531 | 27040.00 | 23921.700 | 11.532 |
| 604.05 | 0.998   | 13.833 | 14.593  | -5.495 | 44.765 | 39.603 | 11.530 | 27084.80 | 23961.500 | 11.531 |
| 605.05 | 0.998   | 13.833 | 14.593  | -5.495 | 44.765 | 39.603 | 11.530 | 27129.60 | 24001.500 | 11.530 |
| 606.05 | 0.998   | 13.833 | 14.593  | -5.495 | 44.823 | 39.604 | 11.645 | 27209.90 | 24041.600 | 11.644 |
| 607.05 | 0.998   | 13.833 | 14.593  | -5.495 | 44.823 | 39.604 | 11.645 | 27254.70 | 24080.900 | 11.645 |
| 608.05 | 0.998   | 13.833 | 14.593  | -5.496 | 44.823 | 39.604 | 11.644 | 27299.50 | 24120.400 | 11.646 |
| 609.05 | 0.998   | 13.833 | 14.594  | -5.496 | 44.823 | 39.604 | 11.644 | 27344.40 | 24160.900 | 11.642 |
| 610.05 | 0.998   | 13.833 | 14.594  | -5.496 | 44.823 | 39.604 | 11.643 | 27389.20 | 24200.600 | 11.642 |
| 611.05 | 0.998   | 13.833 | 14.594  | -5.496 | 44.823 | 39.605 | 11.643 | 27434.00 | 24239.600 | 11.644 |
| 612.05 | 0.998   | 13.833 | 14.594  | -5.497 | 44.823 | 39.605 | 11.642 | 27478.80 | 24279.500 | 11.643 |
| 613.05 | 0.998   | 13.833 | 14.594  | -5.497 | 44.823 | 39.605 | 11.642 | 27523.70 | 24319.700 | 11.641 |
| 614.05 | 0.998   | 13.833 | 14.594  | -5.497 | 44.823 | 39.605 | 11.641 | 27568.50 | 24359.000 | 11.642 |
| 615.05 | 0.998   | 13.833 | 14.594  | -5.498 | 44.823 | 39.605 | 11.641 | 27613.30 | 24398.500 | 11.642 |
| 616.05 | 0.998   | 13.833 | 14.594  | -5.498 | 44.823 | 39.606 | 11.640 | 27658.10 | 24439.000 | 11.639 |
| 617.05 | 0.998   | 13.833 | 14.594  | -5.498 | 44.823 | 39.606 | 11.640 | 27703.00 | 24478.800 | 11.639 |
| 618.05 | 0.998   | 13.833 | 14.594  | -5.498 | 44.823 | 39.606 | 11.639 | 27747.80 | 24517.700 | 11.641 |
| 619.05 | 0.998   | 13.833 | 14.594  | -5.499 | 44.823 | 39.606 | 11.639 | 27792.60 | 24557.700 | 11.639 |
| 620.05 | 0.998   | 13.833 | 14.594  | -5.499 | 44.823 | 39.607 | 11.638 | 27837.40 | 24597.800 | 11.638 |
| 621.05 | 0.998   | 13.833 | 14.594  | -5.499 | 44.823 | 39.607 | 11.638 | 27882.20 | 24637.200 | 11.638 |
| 622.05 | 0.998   | 13.833 | 14.594  | -5.499 | 44.823 | 39.607 | 11.638 | 27927.10 | 24676.700 | 11.639 |
| 623.05 | 0.998   | 13.833 | 14.594  | -5.500 | 44.823 | 39.607 | 11.637 | 27971.90 | 24717.200 | 11.636 |
| 624.05 | 0.998   | 13.833 | 14.594  | -5.500 | 44.823 | 39.607 | 11.637 | 28016.70 | 24756.900 | 11.635 |
| 625.05 | 0.998   | 13.833 | 14.594  | -5.500 | 44.823 | 39.608 | 11.636 | 28061.50 | 24795.800 | 11.638 |
| 626.05 | 0.998   | 13.833 | 14.594  | -5.501 | 44.823 | 39.608 | 11.636 | 28106.40 | 24835.800 | 11.636 |
| 627.05 | 0.998   | 13.833 | 14.594  | -5.501 | 44.823 | 39.608 | 11.635 | 28151.20 | 24875.900 | 11.635 |
| 628.05 | 0.998   | 13.833 | 14.594  | -5.501 | 44.823 | 39.608 | 11.635 | 28196.00 | 24915.200 | 11.636 |
| 629.05 | 0.998   | 13.833 | 14.594  | -5.501 | 44.823 | 39.608 | 11.634 | 28240.80 | 24955.600 | 11.633 |
| 630.05 | 0.998   | 13.833 | 14.594  | -5.502 | 44.823 | 39.609 | 11.634 | 28285.70 | 24995.100 | 11.633 |
| 631.05 | 0.998   | 13.833 | 14.594  | -5.502 | 44.823 | 39.609 | 11.633 | 28330.50 | 25034.800 | 11.633 |

| Z      | z/(1+z) | LTD LC | LTD HHC | %Error | CD LC  | CD HHC | %Error | LD LC    | LD HHC    | %Error |
|--------|---------|--------|---------|--------|--------|--------|--------|----------|-----------|--------|
| (1)    | (2)     | (3)    | (4)     | (5)    | (6)    | (7)    | (8)    | (9)      | (10)      | (11)   |
| 632.05 | 0.998   | 13.833 | 14.594  | -5.502 | 44.823 | 39.609 | 11.633 | 28375.30 | 25074.600 | 11.632 |
| 633.05 | 0.998   | 13.833 | 14.594  | -5.502 | 44.823 | 39.609 | 11.633 | 28420.10 | 25114.500 | 11.631 |
| 634.05 | 0.998   | 13.833 | 14.594  | -5.503 | 44.823 | 39.609 | 11.632 | 28465.00 | 25153.600 | 11.633 |
| 635.05 | 0.998   | 13.833 | 14.594  | -5.503 | 44.823 | 39.610 | 11.632 | 28509.80 | 25193.800 | 11.631 |
| 636.05 | 0.998   | 13.833 | 14.595  | -5.503 | 44.823 | 39.610 | 11.631 | 28554.60 | 25233.100 | 11.632 |
| 637.05 | 0.998   | 13.833 | 14.595  | -5.503 | 44.823 | 39.610 | 11.631 | 28599.40 | 25272.600 | 11.632 |
| 638.05 | 0.998   | 13.833 | 14.595  | -5.504 | 44.823 | 39.610 | 11.630 | 28644.20 | 25313.200 | 11.629 |
| 639.05 | 0.998   | 13.833 | 14.595  | -5.504 | 44.823 | 39.610 | 11.630 | 28689.10 | 25352.900 | 11.629 |
| 640.05 | 0.998   | 13.833 | 14.595  | -5.504 | 44.823 | 39.610 | 11.630 | 28733.90 | 25392.700 | 11.628 |
| 641.05 | 0.998   | 13.833 | 14.595  | -5.505 | 44.823 | 39.611 | 11.629 | 28778.70 | 25431.700 | 11.630 |
| 642.05 | 0.998   | 13.833 | 14.595  | -5.505 | 44.823 | 39.611 | 11.629 | 28823.50 | 25471.800 | 11.628 |
| 643.05 | 0.998   | 13.833 | 14.595  | -5.505 | 44.823 | 39.611 | 11.628 | 28868.40 | 25511.800 | 11.630 |
| 644.05 | 0.998   | 13.833 | 14.595  | -5.505 | 44.823 | 39.611 | 11.628 | 28913.20 | 25551.400 | 11.627 |
| 645.05 | 0.998   | 13.833 | 14.595  | -5.505 | 44.883 | 39.611 | 11.746 | 28996.90 | 25590.900 | 11.746 |
| 646.05 | 0.998   | 13.833 | 14.595  | -5.505 | 44.883 | 39.612 | 11.746 | 29041.80 | 25630.500 | 11.746 |
| 647.05 | 0.998   | 13.833 | 14.595  | -5.505 | 44.883 | 39.612 | 11.745 | 29086.70 | 25670.200 | 11.746 |
| 648.05 | 0.998   | 13.833 | 14.595  | -5.506 | 44.883 | 39.612 | 11.745 | 29131.50 | 25710.000 | 11.745 |
| 649.05 | 0.998   | 13.833 | 14.595  | -5.506 | 44.883 | 39.612 | 11.744 | 29176.40 | 25750.000 | 11.744 |
| 650.05 | 0.998   | 13.833 | 14.595  | -5.506 | 44.883 | 39.612 | 11.744 | 29221.30 | 25790.100 | 11.742 |
| 651.05 | 0.998   | 13.833 | 14.595  | -5.506 | 44.883 | 39.613 | 11.743 | 29266.20 | 25829.300 | 11.744 |
| 652.05 | 0.998   | 13.833 | 14.595  | -5.507 | 44.883 | 39.613 | 11.743 | 29311.10 | 25868.600 | 11.745 |
| 653.05 | 0.998   | 13.833 | 14.595  | -5.507 | 44.883 | 39.613 | 11.743 | 29356.00 | 25909.100 | 11.742 |
| 654.05 | 0.998   | 13.833 | 14.595  | -5.507 | 44.883 | 39.613 | 11.742 | 29400.80 | 25948.700 | 11.742 |
| 655.05 | 0.998   | 13.833 | 14.595  | -5.507 | 44.883 | 39.613 | 11.742 | 29445.70 | 25988.400 | 11.742 |
| 656.05 | 0.998   | 13.833 | 14.595  | -5.508 | 44.883 | 39.614 | 11.741 | 29490.60 | 26028.200 | 11.741 |
| 657.05 | 0.998   | 13.833 | 14.595  | -5.508 | 44.883 | 39.614 | 11.741 | 29535.50 | 26068.100 | 11.740 |
| 658.05 | 0.998   | 13.833 | 14.595  | -5.508 | 44.883 | 39.614 | 11.741 | 29580.40 | 26107.100 | 11.742 |
| 659.05 | 0.998   | 13.833 | 14.595  | -5.508 | 44.883 | 39.614 | 11.740 | 29625.30 | 26147.300 | 11.740 |
| 660.05 | 0.998   | 13.833 | 14.595  | -5.509 | 44.883 | 39.614 | 11.740 | 29670.10 | 26186.600 | 11.741 |
| 661.05 | 0.998   | 13.833 | 14.595  | -5.509 | 44.883 | 39.614 | 11.739 | 29715.00 | 26227.000 | 11.738 |
| 662.05 | 0.998   | 13.833 | 14.595  | -5.509 | 44.883 | 39.615 | 11.739 | 29759.90 | 26266.500 | 11.739 |
| 663.05 | 0.998   | 13.833 | 14.595  | -5.509 | 44.883 | 39.615 | 11.739 | 29804.80 | 26306.200 | 11.739 |
| 664.05 | 0.998   | 13.833 | 14.595  | -5.509 | 44.883 | 39.615 | 11.738 | 29849.70 | 26345.900 | 11.738 |
| 665.05 | 0.998   | 13.833 | 14.596  | -5.510 | 44.883 | 39.615 | 11.738 | 29894.60 | 26385.800 | 11.737 |
| 666.05 | 0.999   | 13.833 | 14.596  | -5.510 | 44.883 | 39.615 | 11.737 | 29939.40 | 26425.700 | 11.736 |
| 667.05 | 0.999   | 13.833 | 14.596  | -5.510 | 44.883 | 39.615 | 11.737 | 29984.30 | 26464.800 | 11.738 |
| 668.05 | 0.999   | 13.833 | 14.596  | -5.510 | 44.883 | 39.616 | 11.737 | 30029.20 | 26505.000 | 11.736 |
| 669.05 | 0.999   | 13.833 | 14.596  | -5.511 | 44.883 | 39.616 | 11.736 | 30074.10 | 26544.300 | 11.737 |
| 670.05 | 0.999   | 13.833 | 14.596  | -5.511 | 44.883 | 39.616 | 11.736 | 30119.00 | 26584.800 | 11.734 |
| 671.05 | 0.999   | 13.833 | 14.596  | -5.511 | 44.883 | 39.616 | 11.735 | 30163.90 | 26624.300 | 11.735 |
| 672.05 | 0.999   | 13.833 | 14.596  | -5.511 | 44.883 | 39.616 | 11.735 | 30208.70 | 26663.900 | 11.734 |
| 673.05 | 0.999   | 13.833 | 14.596  | -5.512 | 44.883 | 39.617 | 11.735 | 30253.60 | 26703.700 | 11.734 |
| 674.05 | 0.999   | 13.833 | 14.596  | -5.512 | 44.883 | 39.617 | 11.734 | 30298.50 | 26743.600 | 11.733 |
| 675.05 | 0.999   | 13.833 | 14.596  | -5.512 | 44.883 | 39.617 | 11.734 | 30343.40 | 26782.500 | 11.735 |
| 676.05 | 0.999   | 13.833 | 14.596  | -5.512 | 44.883 | 39.617 | 11.733 | 30388.30 | 26822.600 | 11.734 |
| 677.05 | 0.999   | 13.833 | 14.596  | -5.513 | 44.883 | 39.617 | 11.733 | 30433.20 | 26862.800 | 11.732 |
| 678.05 | 0.999   | 13.833 | 14.596  | -5.513 | 44.883 | 39.617 | 11.733 | 30478.00 | 26902.100 | 11.733 |
| 679.05 | 0.999   | 13.833 | 14.596  | -5.513 | 44.883 | 39.618 | 11.732 | 30522.90 | 26941.400 | 11.734 |
| 680.05 | 0.999   | 13.833 | 14.596  | -5.513 | 44.883 | 39.618 | 11.732 | 30567.80 | 26982.000 | 11.731 |
| 681.05 | 0.999   | 13.833 | 14.596  | -5.513 | 44.883 | 39.618 | 11.731 | 30612.70 | 27021.600 | 11.731 |
| 682.05 | 0.999   | 13.833 | 14.596  | -5.514 | 44.883 | 39.618 | 11.731 | 30657.60 | 27061.300 | 11.730 |
| 683.05 | 0.999   | 13.833 | 14.596  | -5.514 | 44.883 | 39.618 | 11.731 | 30702.50 | 27101.200 | 11.730 |
| 684.05 | 0.999   | 13.833 | 14.596  | -5.514 | 44.883 | 39.618 | 11.730 | 30747.30 | 27141.100 | 11.729 |
| 685.05 | 0.999   | 13.833 | 14.596  | -5.514 | 44.883 | 39.619 | 11.730 | 30792.20 | 27180.100 | 11.731 |
| 686.05 | 0.999   | 13.833 | 14.596  | -5.515 | 44.883 | 39.619 | 11.730 | 30837.10 | 27220.300 | 11.729 |
| 687.05 | 0.999   | 13.833 | 14.596  | -5.515 | 44.883 | 39.619 | 11.729 | 30882.00 | 27259.500 | 11.730 |
| 688.05 | 0.999   | 13.833 | 14.596  | -5.515 | 44.883 | 39.619 | 11.729 | 30926.90 | 27299.900 | 11.728 |
| 689.05 | 0.999   | 13.833 | 14.596  | -5.515 | 44.945 | 39.619 | 11.850 | 31014.50 | 27339.300 | 11.850 |
| 690.05 | 0.999   | 13.833 | 14.596  | -5.515 | 44.945 | 39.619 | 11.850 | 31059.40 | 27378.800 | 11.850 |
| 691.05 | 0.999   | 13.833 | 14.596  | -5.515 | 44.945 | 39.620 | 11.849 | 31104.40 | 27418.500 | 11.850 |
| 692.05 | 0.999   | 13.833 | 14.596  | -5.515 | 44.945 | 39.620 | 11.849 | 31149.30 | 27458.200 | 11.850 |
| 693.05 | 0.999   | 13.833 | 14.596  | -5.515 | 44.945 | 39.620 | 11.849 | 31194.20 | 27498.100 | 11.849 |
| 694.05 | 0.999   | 13.833 | 14.596  | -5.516 | 44.945 | 39.620 | 11.848 | 31239.20 | 27538.100 | 11.848 |
| 695.05 | 0.999   | 13.833 | 14.596  | -5.516 | 44.945 | 39.620 | 11.848 | 31284.10 | 27578.200 | 11.846 |
| 696.05 | 0.999   | 13.833 | 14.596  | -5.516 | 44.945 | 39.620 | 11.847 | 31329.10 | 27617.300 | 11.848 |
| 697.05 | 0.999   | 13.833 | 14.597  | -5.516 | 44.945 | 39.621 | 11.847 | 31374.00 | 27657.600 | 11.846 |
| 698.05 | 0.999   | 13.833 | 14.597  | -5.517 | 44.945 | 39.621 | 11.847 | 31419.00 | 27696.900 | 11.847 |

| Z      | z/(1+z) | LTD LC | LTD HHC | %Error | CD LC  | CD HHC | %Error | LD LC    | LD HHC    | %Error |
|--------|---------|--------|---------|--------|--------|--------|--------|----------|-----------|--------|
| (1)    | (2)     | (3)    | (4)     | (5)    | (6)    | (7)    | (8)    | (9)      | (10)      | (11)   |
| 699.05 | 0.999   | 13.833 | 14.597  | -5.517 | 44.945 | 39.621 | 11.846 | 31463.90 | 27736.300 | 11.847 |
| 700.05 | 0.999   | 13.833 | 14.597  | -5.517 | 44.945 | 39.621 | 11.846 | 31508.90 | 27775.800 | 11.848 |
| 701.05 | 0.999   | 13.833 | 14.597  | -5.517 | 44.945 | 39.621 | 11.846 | 31553.80 | 27816.600 | 11.844 |
| 702.05 | 0.999   | 13.833 | 14.597  | -5.517 | 44.945 | 39.621 | 11.845 | 31598.80 | 27856.300 | 11.844 |
| 703.05 | 0.999   | 13.833 | 14.597  | -5.518 | 44.945 | 39.622 | 11.845 | 31643.70 | 27895.000 | 11.847 |
| 704.05 | 0.999   | 13.833 | 14.597  | -5.518 | 44.945 | 39.622 | 11.845 | 31688.60 | 27935.000 | 11.845 |
| 705.05 | 0.999   | 13.833 | 14.597  | -5.518 | 44.945 | 39.622 | 11.844 | 31733.60 | 27975.100 | 11.844 |
| 706.05 | 0.999   | 13.833 | 14.597  | -5.518 | 44.945 | 39.622 | 11.844 | 31778.50 | 28015.300 | 11.842 |
| 707.05 | 0.999   | 13.833 | 14.597  | -5.518 | 44.945 | 39.622 | 11.844 | 31823.50 | 28054.400 | 11.844 |
| 708.05 | 0.999   | 13.833 | 14.597  | -5.519 | 44.945 | 39.622 | 11.843 | 31868.40 | 28093.700 | 11.845 |
| 709.05 | 0.999   | 13.833 | 14.597  | -5.519 | 44.945 | 39.623 | 11.843 | 31913.40 | 28134.200 | 11.842 |
| 710.05 | 0.999   | 13.833 | 14.597  | -5.519 | 44.945 | 39.623 | 11.842 | 31958.30 | 28173.700 | 11.843 |
| 711.05 | 0.999   | 13.833 | 14.597  | -5.519 | 44.945 | 39.623 | 11.842 | 32003.30 | 28213.200 | 11.843 |
| 712.05 | 0.999   | 13.833 | 14.597  | -5.520 | 44.945 | 39.623 | 11.842 | 32048.20 | 28252.900 | 11.843 |
| 713.05 | 0.999   | 13.833 | 14.597  | -5.520 | 44.945 | 39.623 | 11.841 | 32093.10 | 28292.700 | 11.842 |
| 714.05 | 0.999   | 13.833 | 14.597  | -5.520 | 44.945 | 39.623 | 11.841 | 32138.10 | 28332.600 | 11.841 |
| 715.05 | 0.999   | 13.833 | 14.597  | -5.520 | 44.945 | 39.623 | 11.841 | 32183.00 | 28372.600 | 11.840 |
| 716.05 | 0.999   | 13.833 | 14.597  | -5.520 | 44.945 | 39.624 | 11.840 | 32228.00 | 28411.500 | 11.842 |
| 717.05 | 0.999   | 13.833 | 14.597  | -5.521 | 44.945 | 39.624 | 11.840 | 32272.90 | 28451.800 | 11.840 |
| 718.05 | 0.999   | 13.833 | 14.597  | -5.521 | 44.945 | 39.624 | 11.840 | 32317.90 | 28492.100 | 11.838 |
| 719.05 | 0.999   | 13.833 | 14.597  | -5.521 | 44.945 | 39.624 | 11.839 | 32362.80 | 28531.400 | 11.839 |
| 720.05 | 0.999   | 13.833 | 14.597  | -5.521 | 44.945 | 39.624 | 11.839 | 32407.80 | 28570.700 | 11.840 |
| 721.05 | 0.999   | 13.833 | 14.597  | -5.521 | 44.945 | 39.624 | 11.839 | 32452.70 | 28610.200 | 11.840 |
| 722.05 | 0.999   | 13.833 | 14.597  | -5.522 | 44.945 | 39.625 | 11.838 | 32497.70 | 28651.000 | 11.837 |
| 723.05 | 0.999   | 13.833 | 14.597  | -5.522 | 44.945 | 39.625 | 11.838 | 32542.60 | 28690.600 | 11.837 |
| 724.05 | 0.999   | 13.833 | 14.597  | -5.522 | 44.945 | 39.625 | 11.838 | 32587.50 | 28730.400 | 11.836 |
| 725.05 | 0.999   | 13.833 | 14.597  | -5.522 | 44.945 | 39.625 | 11.837 | 32632.50 | 28769.100 | 11.839 |
| 726.05 | 0.999   | 13.833 | 14.597  | -5.522 | 44.945 | 39.625 | 11.837 | 32677.40 | 28809.100 | 11.838 |
| 727.05 | 0.999   | 13.833 | 14.597  | -5.523 | 44.945 | 39.625 | 11.837 | 32722.40 | 28849.200 | 11.837 |
| 728.05 | 0.999   | 13.833 | 14.597  | -5.523 | 44.945 | 39.625 | 11.836 | 32767.30 | 28889.400 | 11.835 |
| 729.05 | 0.999   | 13.833 | 14.597  | -5.523 | 44.945 | 39.626 | 11.836 | 32812.30 | 28928.500 | 11.836 |
| 730.05 | 0.999   | 13.833 | 14.597  | -5.523 | 44.945 | 39.626 | 11.836 | 32857.20 | 28969.000 | 11.834 |
| 731.05 | 0.999   | 13.833 | 14.598  | -5.523 | 44.945 | 39.626 | 11.835 | 32902.20 | 29008.200 | 11.835 |
| 732.05 | 0.999   | 13.833 | 14.598  | -5.524 | 44.945 | 39.626 | 11.835 | 32947.10 | 29047.600 | 11.836 |
| 733.05 | 0.999   | 13.833 | 14.598  | -5.524 | 44.945 | 39.626 | 11.835 | 32992.10 | 29087.200 | 11.836 |
| 734.05 | 0.999   | 13.833 | 14.598  | -5.524 | 44.945 | 39.626 | 11.834 | 33037.00 | 29126.800 | 11.836 |
| 735.05 | 0.999   | 13.833 | 14.598  | -5.524 | 44.945 | 39.626 | 11.834 | 33081.90 | 29166.500 | 11.836 |
| 736.05 | 0.999   | 13.833 | 14.598  | -5.524 | 44.945 | 39.627 | 11.834 | 33126.90 | 29206.300 | 11.835 |
| 737.05 | 0.999   | 13.833 | 14.598  | -5.525 | 44.945 | 39.627 | 11.833 | 33171.80 | 29246.200 | 11.834 |
| 738.05 | 0.999   | 13.833 | 14.598  | -5.525 | 44.945 | 39.627 | 11.833 | 33216.80 | 29286.300 | 11.833 |
| 739.05 | 0.999   | 13.833 | 14.598  | -5.525 | 44.945 | 39.627 | 11.833 | 33261.70 | 29326.500 | 11.831 |
| 740.05 | 0.999   | 13.834 | 14.598  | -5.524 | 45.009 | 39.627 | 11.957 | 33353.90 | 29365.400 | 11.958 |
| 741.05 | 0.999   | 13.834 | 14.598  | -5.525 | 45.009 | 39.627 | 11.957 | 33398.90 | 29405.800 | 11.956 |
| 742.05 | 0.999   | 13.834 | 14.598  | -5.525 | 45.009 | 39.627 | 11.957 | 33443.90 | 29445.000 | 11.957 |
| 743.05 | 0.999   | 13.834 | 14.598  | -5.525 | 45.009 | 39.628 | 11.956 | 33488.90 | 29484.200 | 11.958 |
| 744.05 | 0.999   | 13.834 | 14.598  | -5.525 | 45.009 | 39.628 | 11.956 | 33533.90 | 29524.900 | 11.955 |
| 745.05 | 0.999   | 13.834 | 14.598  | -5.525 | 45.009 | 39.628 | 11.956 | 33578.90 | 29564.400 | 11.955 |
| 746.05 | 0.999   | 13.834 | 14.598  | -5.526 | 45.009 | 39.628 | 11.955 | 33624.00 | 29604.000 | 11.956 |
| 747.05 | 0.999   | 13.834 | 14.598  | -5.526 | 45.009 | 39.628 | 11.955 | 33669.00 | 29643.700 | 11.955 |
| 748.05 | 0.999   | 13.834 | 14.598  | -5.526 | 45.009 | 39.628 | 11.955 | 33714.00 | 29683.600 | 11.955 |
| 749.05 | 0.999   | 13.834 | 14.598  | -5.526 | 45.009 | 39.628 | 11.954 | 33759.00 | 29723.500 | 11.954 |
| 750.05 | 0.999   | 13.834 | 14.598  | -5.526 | 45.009 | 39.629 | 11.954 | 33804.00 | 29763.500 | 11.953 |
| 751.05 | 0.999   | 13.834 | 14.598  | -5.527 | 45.009 | 39.629 | 11.954 | 33849.00 | 29802.300 | 11.955 |
| 752.05 | 0.999   | 13.834 | 14.598  | -5.527 | 45.009 | 39.629 | 11.954 | 33894.00 | 29842.500 | 11.953 |
| 753.05 | 0.999   | 13.834 | 14.598  | -5.527 | 45.009 | 39.629 | 11.953 | 33939.00 | 29882.900 | 11.951 |
| 754.05 | 0.999   | 13.834 | 14.598  | -5.527 | 45.009 | 39.629 | 11.953 | 33984.00 | 29922.000 | 11.953 |
| 755.05 | 0.999   | 13.834 | 14.598  | -5.527 | 45.009 | 39.629 | 11.953 | 34029.00 | 29961.200 | 11.954 |
| 756.05 | 0.999   | 13.834 | 14.598  | -5.527 | 45.009 | 39.629 | 11.952 | 34074.00 | 30001.900 | 11.951 |
| 757.05 | 0.999   | 13.834 | 14.598  | -5.528 | 45.009 | 39.630 | 11.952 | 34119.10 | 30041.300 | 11.952 |
| 758.05 | 0.999   | 13.834 | 14.598  | -5.528 | 45.009 | 39.630 | 11.952 | 34164.10 | 30080.800 | 11.952 |
| 759.05 | 0.999   | 13.834 | 14.598  | -5.528 | 45.009 | 39.630 | 11.951 | 34209.10 | 30120.400 | 11.952 |
| 760.05 | 0.999   | 13.834 | 14.598  | -5.528 | 45.009 | 39.630 | 11.951 | 34254.10 | 30160.100 | 11.952 |
| 761.05 | 0.999   | 13.834 | 14.598  | -5.528 | 45.009 | 39.630 | 11.951 | 34299.10 | 30200.000 | 11.951 |
| 762.05 | 0.999   | 13.834 | 14.598  | -5.529 | 45.009 | 39.630 | 11.950 | 34344.10 | 30239.900 | 11.950 |
| 763.05 | 0.999   | 13.834 | 14.598  | -5.529 | 45.009 | 39.630 | 11.950 | 34389.10 | 30279.900 | 11.949 |
| 764.05 | 0.999   | 13.834 | 14.598  | -5.529 | 45.009 | 39.631 | 11.950 | 34434.10 | 30318.700 | 11.952 |
| 765.05 | 0.999   | 13.834 | 14.598  | -5.529 | 45.009 | 39.631 | 11.950 | 34479.10 | 30359.000 | 11.950 |

| Z      | $z/(1+z)$ | LTD LC | LTD HHC | %Error | CD LC  | CD HHC | %Error | LD LC    | LD HHC    | %Error |
|--------|-----------|--------|---------|--------|--------|--------|--------|----------|-----------|--------|
| (1)    | (2)       | (3)    | (4)     | (5)    | (6)    | (7)    | (8)    | (9)      | (10)      | (11)   |
| 766.05 | 0.999     | 13.834 | 14.598  | -5.529 | 45.009 | 39.631 | 11.949 | 34524.10 | 30399.300 | 11.948 |
| 767.05 | 0.999     | 13.834 | 14.598  | -5.529 | 45.009 | 39.631 | 11.949 | 34569.10 | 30438.400 | 11.949 |
| 768.05 | 0.999     | 13.834 | 14.598  | -5.530 | 45.009 | 39.631 | 11.949 | 34614.20 | 30477.600 | 11.951 |
| 769.05 | 0.999     | 13.834 | 14.598  | -5.530 | 45.009 | 39.631 | 11.948 | 34659.20 | 30518.200 | 11.948 |
| 770.05 | 0.999     | 13.834 | 14.599  | -5.530 | 45.009 | 39.631 | 11.948 | 34704.20 | 30557.600 | 11.948 |
| 771.05 | 0.999     | 13.834 | 14.599  | -5.530 | 45.009 | 39.631 | 11.948 | 34749.20 | 30597.100 | 11.949 |
| 772.05 | 0.999     | 13.834 | 14.599  | -5.530 | 45.009 | 39.632 | 11.947 | 34794.20 | 30636.700 | 11.949 |
| 773.05 | 0.999     | 13.834 | 14.599  | -5.531 | 45.009 | 39.632 | 11.947 | 34839.20 | 30676.300 | 11.949 |
| 774.05 | 0.999     | 13.834 | 14.599  | -5.531 | 45.009 | 39.632 | 11.947 | 34884.20 | 30716.100 | 11.948 |
| 775.05 | 0.999     | 13.834 | 14.599  | -5.531 | 45.009 | 39.632 | 11.947 | 34929.20 | 30756.000 | 11.948 |
| 776.05 | 0.999     | 13.834 | 14.599  | -5.531 | 45.009 | 39.632 | 11.946 | 34974.20 | 30796.000 | 11.947 |
| 777.05 | 0.999     | 13.834 | 14.599  | -5.531 | 45.009 | 39.632 | 11.946 | 35019.20 | 30836.100 | 11.945 |
| 778.05 | 0.999     | 13.834 | 14.599  | -5.531 | 45.009 | 39.632 | 11.946 | 35064.20 | 30876.300 | 11.944 |
| 779.05 | 0.999     | 13.834 | 14.599  | -5.532 | 45.009 | 39.633 | 11.945 | 35109.30 | 30915.100 | 11.946 |
| 780.05 | 0.999     | 13.834 | 14.599  | -5.532 | 45.009 | 39.633 | 11.945 | 35154.30 | 30955.500 | 11.944 |
| 781.05 | 0.999     | 13.834 | 14.599  | -5.532 | 45.009 | 39.633 | 11.945 | 35199.30 | 30994.600 | 11.945 |
| 782.05 | 0.999     | 13.834 | 14.599  | -5.532 | 45.009 | 39.633 | 11.945 | 35244.30 | 31035.200 | 11.943 |
| 783.05 | 0.999     | 13.834 | 14.599  | -5.532 | 45.009 | 39.633 | 11.944 | 35289.30 | 31074.500 | 11.944 |
| 784.05 | 0.999     | 13.834 | 14.599  | -5.532 | 45.009 | 39.633 | 11.944 | 35334.30 | 31113.800 | 11.944 |
| 785.05 | 0.999     | 13.834 | 14.599  | -5.533 | 45.009 | 39.633 | 11.944 | 35379.30 | 31153.300 | 11.945 |
| 786.05 | 0.999     | 13.834 | 14.599  | -5.533 | 45.009 | 39.633 | 11.943 | 35424.30 | 31192.800 | 11.945 |
| 787.05 | 0.999     | 13.834 | 14.599  | -5.533 | 45.009 | 39.634 | 11.943 | 35469.30 | 31232.500 | 11.945 |
| 788.05 | 0.999     | 13.834 | 14.599  | -5.533 | 45.009 | 39.634 | 11.943 | 35514.30 | 31272.300 | 11.945 |
| 789.05 | 0.999     | 13.834 | 14.599  | -5.533 | 45.009 | 39.634 | 11.943 | 35559.30 | 31312.100 | 11.944 |
| 790.05 | 0.999     | 13.834 | 14.599  | -5.533 | 45.009 | 39.634 | 11.942 | 35604.40 | 31352.100 | 11.943 |
| 791.05 | 0.999     | 13.834 | 14.599  | -5.534 | 45.009 | 39.634 | 11.942 | 35649.40 | 31392.200 | 11.942 |
| 792.05 | 0.999     | 13.834 | 14.599  | -5.534 | 45.009 | 39.634 | 11.942 | 35694.40 | 31432.300 | 11.940 |
| 793.05 | 0.999     | 13.834 | 14.599  | -5.534 | 45.009 | 39.634 | 11.941 | 35739.40 | 31471.100 | 11.943 |
| 794.05 | 0.999     | 13.834 | 14.599  | -5.534 | 45.009 | 39.634 | 11.941 | 35784.40 | 31511.500 | 11.941 |
| 795.05 | 0.999     | 13.834 | 14.599  | -5.534 | 45.009 | 39.635 | 11.941 | 35829.40 | 31550.400 | 11.943 |
| 796.05 | 0.999     | 13.834 | 14.599  | -5.534 | 45.009 | 39.635 | 11.941 | 35874.40 | 31591.000 | 11.940 |
| 797.05 | 0.999     | 13.834 | 14.599  | -5.535 | 45.009 | 39.635 | 11.940 | 35919.40 | 31630.200 | 11.941 |
| 798.05 | 0.999     | 13.834 | 14.599  | -5.535 | 45.009 | 39.635 | 11.940 | 35964.40 | 31671.000 | 11.938 |
| 799.05 | 0.999     | 13.834 | 14.599  | -5.534 | 45.075 | 39.635 | 12.068 | 36009.40 | 31710.300 | 12.067 |
| 800.05 | 0.999     | 13.834 | 14.599  | -5.535 | 45.075 | 39.635 | 12.068 | 36107.10 | 31749.800 | 12.068 |
| 801.05 | 0.999     | 13.834 | 14.599  | -5.535 | 45.075 | 39.635 | 12.068 | 36152.20 | 31789.400 | 12.068 |
| 802.05 | 0.999     | 13.834 | 14.599  | -5.535 | 45.075 | 39.635 | 12.067 | 36197.30 | 31829.000 | 12.068 |
| 803.05 | 0.999     | 13.834 | 14.599  | -5.535 | 45.075 | 39.636 | 12.067 | 36242.40 | 31868.800 | 12.068 |
| 804.05 | 0.999     | 13.834 | 14.599  | -5.535 | 45.075 | 39.636 | 12.067 | 36287.40 | 31908.600 | 12.067 |
| 805.05 | 0.999     | 13.834 | 14.599  | -5.535 | 45.075 | 39.636 | 12.067 | 36332.50 | 31948.600 | 12.066 |
| 806.05 | 0.999     | 13.834 | 14.599  | -5.535 | 45.075 | 39.636 | 12.066 | 36377.60 | 31988.600 | 12.065 |
| 807.05 | 0.999     | 13.834 | 14.599  | -5.536 | 45.075 | 39.636 | 12.066 | 36422.70 | 32027.300 | 12.068 |
| 808.05 | 0.999     | 13.834 | 14.599  | -5.536 | 45.075 | 39.636 | 12.066 | 36467.70 | 32067.500 | 12.066 |
| 809.05 | 0.999     | 13.834 | 14.599  | -5.536 | 45.075 | 39.636 | 12.066 | 36512.80 | 32107.900 | 12.064 |
| 810.05 | 0.999     | 13.834 | 14.599  | -5.536 | 45.075 | 39.636 | 12.065 | 36557.90 | 32146.800 | 12.066 |
| 811.05 | 0.999     | 13.834 | 14.599  | -5.536 | 45.075 | 39.637 | 12.065 | 36603.00 | 32187.300 | 12.064 |
| 812.05 | 0.999     | 13.834 | 14.599  | -5.536 | 45.075 | 39.637 | 12.065 | 36648.00 | 32226.400 | 12.065 |
| 813.05 | 0.999     | 13.834 | 14.600  | -5.537 | 45.075 | 39.637 | 12.065 | 36693.10 | 32265.600 | 12.066 |
| 814.05 | 0.999     | 13.834 | 14.600  | -5.537 | 45.075 | 39.637 | 12.064 | 36738.20 | 32306.500 | 12.063 |
| 815.05 | 0.999     | 13.834 | 14.600  | -5.537 | 45.075 | 39.637 | 12.064 | 36783.30 | 32345.800 | 12.064 |
| 816.05 | 0.999     | 13.834 | 14.600  | -5.537 | 45.075 | 39.637 | 12.064 | 36828.30 | 32385.300 | 12.064 |
| 817.05 | 0.999     | 13.834 | 14.600  | -5.537 | 45.075 | 39.637 | 12.063 | 36873.40 | 32424.900 | 12.064 |
| 818.05 | 0.999     | 13.834 | 14.600  | -5.537 | 45.075 | 39.637 | 12.063 | 36918.50 | 32464.600 | 12.064 |
| 819.05 | 0.999     | 13.834 | 14.600  | -5.538 | 45.075 | 39.637 | 12.063 | 36963.60 | 32504.300 | 12.064 |
| 820.05 | 0.999     | 13.834 | 14.600  | -5.538 | 45.075 | 39.638 | 12.063 | 37008.60 | 32544.200 | 12.063 |
| 821.05 | 0.999     | 13.834 | 14.600  | -5.538 | 45.075 | 39.638 | 12.062 | 37053.70 | 32584.200 | 12.062 |
| 822.05 | 0.999     | 13.834 | 14.600  | -5.538 | 45.075 | 39.638 | 12.062 | 37098.80 | 32624.200 | 12.061 |
| 823.05 | 0.999     | 13.834 | 14.600  | -5.538 | 45.075 | 39.638 | 12.062 | 37143.90 | 32664.400 | 12.060 |
| 824.05 | 0.999     | 13.834 | 14.600  | -5.538 | 45.075 | 39.638 | 12.062 | 37188.90 | 32703.000 | 12.063 |
| 825.05 | 0.999     | 13.834 | 14.600  | -5.538 | 45.075 | 39.638 | 12.061 | 37234.00 | 32743.400 | 12.061 |
| 826.05 | 0.999     | 13.834 | 14.600  | -5.539 | 45.075 | 39.638 | 12.061 | 37279.10 | 32782.200 | 12.063 |
| 827.05 | 0.999     | 13.834 | 14.600  | -5.539 | 45.075 | 39.638 | 12.061 | 37324.20 | 32822.800 | 12.060 |
| 828.05 | 0.999     | 13.834 | 14.600  | -5.539 | 45.075 | 39.639 | 12.061 | 37369.20 | 32861.800 | 12.062 |
| 829.05 | 0.999     | 13.834 | 14.600  | -5.539 | 45.075 | 39.639 | 12.060 | 37414.30 | 32902.500 | 12.059 |
| 830.05 | 0.999     | 13.834 | 14.600  | -5.539 | 45.075 | 39.639 | 12.060 | 37459.40 | 32941.700 | 12.060 |
| 831.05 | 0.999     | 13.834 | 14.600  | -5.539 | 45.075 | 39.639 | 12.060 | 37504.50 | 32981.000 | 12.061 |
| 832.05 | 0.999     | 13.834 | 14.600  | -5.540 | 45.075 | 39.639 | 12.060 | 37549.50 | 33020.400 | 12.062 |

| Z      | z/(1+z) | LTD LC | LTD HHC | %Error | CD LC  | CD HHC | %Error | LD LC    | LD HHC    | %Error |
|--------|---------|--------|---------|--------|--------|--------|--------|----------|-----------|--------|
| (1)    | (2)     | (3)    | (4)     | (5)    | (6)    | (7)    | (8)    | (9)      | (10)      | (11)   |
| 833.05 | 0.999   | 13.834 | 14.600  | -5.540 | 45.075 | 39.639 | 12.059 | 37594.60 | 33061.600 | 12.058 |
| 834.05 | 0.999   | 13.834 | 14.600  | -5.540 | 45.075 | 39.639 | 12.059 | 37639.70 | 33101.100 | 12.058 |
| 835.05 | 0.999   | 13.834 | 14.600  | -5.540 | 45.075 | 39.639 | 12.059 | 37684.80 | 33140.800 | 12.058 |
| 836.05 | 0.999   | 13.834 | 14.600  | -5.540 | 45.075 | 39.639 | 12.059 | 37729.80 | 33180.600 | 12.057 |
| 837.05 | 0.999   | 13.834 | 14.600  | -5.540 | 45.075 | 39.640 | 12.058 | 37774.90 | 33220.500 | 12.057 |
| 838.05 | 0.999   | 13.834 | 14.600  | -5.540 | 45.075 | 39.640 | 12.058 | 37820.00 | 33260.500 | 12.056 |
| 839.05 | 0.999   | 13.834 | 14.600  | -5.541 | 45.075 | 39.640 | 12.058 | 37865.10 | 33298.900 | 12.059 |
| 840.05 | 0.999   | 13.834 | 14.600  | -5.541 | 45.075 | 39.640 | 12.058 | 37910.10 | 33339.000 | 12.058 |
| 841.05 | 0.999   | 13.834 | 14.600  | -5.541 | 45.075 | 39.640 | 12.057 | 37955.20 | 33379.300 | 12.056 |
| 842.05 | 0.999   | 13.834 | 14.600  | -5.541 | 45.075 | 39.640 | 12.057 | 38000.30 | 33417.900 | 12.059 |
| 843.05 | 0.999   | 13.834 | 14.600  | -5.541 | 45.075 | 39.640 | 12.057 | 38045.30 | 33458.400 | 12.057 |
| 844.05 | 0.999   | 13.834 | 14.600  | -5.541 | 45.075 | 39.640 | 12.057 | 38090.40 | 33497.200 | 12.059 |
| 845.05 | 0.999   | 13.834 | 14.600  | -5.542 | 45.075 | 39.640 | 12.056 | 38135.50 | 33537.900 | 12.056 |
| 846.05 | 0.999   | 13.834 | 14.600  | -5.542 | 45.075 | 39.641 | 12.056 | 38180.60 | 33576.900 | 12.058 |
| 847.05 | 0.999   | 13.834 | 14.600  | -5.542 | 45.075 | 39.641 | 12.056 | 38225.60 | 33617.700 | 12.055 |
| 848.05 | 0.999   | 13.834 | 14.600  | -5.542 | 45.075 | 39.641 | 12.056 | 38270.70 | 33657.000 | 12.056 |
| 849.05 | 0.999   | 13.834 | 14.600  | -5.542 | 45.075 | 39.641 | 12.055 | 38315.80 | 33696.300 | 12.057 |
| 850.05 | 0.999   | 13.834 | 14.600  | -5.542 | 45.075 | 39.641 | 12.055 | 38360.90 | 33735.700 | 12.057 |
| 851.05 | 0.999   | 13.834 | 14.600  | -5.542 | 45.075 | 39.641 | 12.055 | 38405.90 | 33776.900 | 12.053 |
| 852.05 | 0.999   | 13.834 | 14.600  | -5.543 | 45.075 | 39.641 | 12.055 | 38451.00 | 33816.500 | 12.053 |
| 853.05 | 0.999   | 13.834 | 14.600  | -5.543 | 45.075 | 39.641 | 12.054 | 38496.10 | 33856.200 | 12.053 |
| 854.05 | 0.999   | 13.834 | 14.600  | -5.543 | 45.075 | 39.641 | 12.054 | 38541.20 | 33896.000 | 12.053 |
| 855.05 | 0.999   | 13.834 | 14.600  | -5.543 | 45.075 | 39.642 | 12.054 | 38586.20 | 33935.800 | 12.052 |
| 856.05 | 0.999   | 13.834 | 14.600  | -5.543 | 45.075 | 39.642 | 12.054 | 38631.30 | 33974.100 | 12.056 |
| 857.05 | 0.999   | 13.834 | 14.600  | -5.543 | 45.075 | 39.642 | 12.053 | 38676.40 | 34014.100 | 12.055 |
| 858.05 | 0.999   | 13.834 | 14.600  | -5.543 | 45.075 | 39.642 | 12.053 | 38721.50 | 34054.300 | 12.053 |
| 859.05 | 0.999   | 13.834 | 14.600  | -5.544 | 45.075 | 39.642 | 12.053 | 38766.50 | 34094.500 | 12.052 |
| 860.05 | 0.999   | 13.834 | 14.600  | -5.544 | 45.075 | 39.642 | 12.053 | 38811.60 | 34133.100 | 12.055 |
| 861.05 | 0.999   | 13.834 | 14.601  | -5.544 | 45.075 | 39.642 | 12.052 | 38856.70 | 34173.500 | 12.052 |
| 862.05 | 0.999   | 13.834 | 14.601  | -5.544 | 45.075 | 39.642 | 12.052 | 38901.80 | 34214.100 | 12.050 |
| 863.05 | 0.999   | 13.834 | 14.601  | -5.544 | 45.075 | 39.642 | 12.052 | 38946.80 | 34252.900 | 12.052 |
| 864.05 | 0.999   | 13.834 | 14.601  | -5.544 | 45.075 | 39.643 | 12.052 | 38991.90 | 34291.900 | 12.054 |
| 865.05 | 0.999   | 13.834 | 14.601  | -5.544 | 45.075 | 39.643 | 12.052 | 39037.00 | 34332.700 | 12.051 |
| 866.05 | 0.999   | 13.834 | 14.601  | -5.545 | 45.075 | 39.643 | 12.051 | 39082.10 | 34371.800 | 12.052 |
| 867.05 | 0.999   | 13.834 | 14.601  | -5.545 | 45.075 | 39.643 | 12.051 | 39127.10 | 34412.800 | 12.049 |
| 868.05 | 0.999   | 13.834 | 14.601  | -5.545 | 45.075 | 39.643 | 12.051 | 39172.20 | 34452.100 | 12.050 |
| 869.05 | 0.999   | 13.834 | 14.601  | -5.545 | 45.143 | 39.643 | 12.183 | 39217.50 | 34491.500 | 12.183 |
| 870.05 | 0.999   | 13.834 | 14.601  | -5.545 | 45.143 | 39.643 | 12.183 | 39262.60 | 34531.000 | 12.183 |
| 871.05 | 0.999   | 13.834 | 14.601  | -5.545 | 45.143 | 39.643 | 12.183 | 39307.80 | 34570.500 | 12.183 |
| 872.05 | 0.999   | 13.834 | 14.601  | -5.545 | 45.143 | 39.643 | 12.182 | 39353.00 | 34610.200 | 12.183 |
| 873.05 | 0.999   | 13.834 | 14.601  | -5.545 | 45.143 | 39.643 | 12.182 | 39398.20 | 34650.000 | 12.183 |
| 874.05 | 0.999   | 13.834 | 14.601  | -5.545 | 45.143 | 39.644 | 12.182 | 39443.40 | 34689.800 | 12.183 |
| 875.05 | 0.999   | 13.834 | 14.601  | -5.545 | 45.143 | 39.644 | 12.182 | 39488.60 | 34729.800 | 12.182 |
| 876.05 | 0.999   | 13.834 | 14.601  | -5.545 | 45.143 | 39.644 | 12.181 | 39533.80 | 34769.800 | 12.181 |
| 877.05 | 0.999   | 13.834 | 14.601  | -5.545 | 45.143 | 39.644 | 12.181 | 39579.00 | 34809.900 | 12.180 |
| 878.05 | 0.999   | 13.834 | 14.601  | -5.546 | 45.143 | 39.644 | 12.181 | 39624.20 | 34848.300 | 12.183 |
| 879.05 | 0.999   | 13.834 | 14.601  | -5.546 | 45.143 | 39.644 | 12.181 | 39669.40 | 34888.600 | 12.181 |
| 880.05 | 0.999   | 13.834 | 14.601  | -5.546 | 45.143 | 39.644 | 12.181 | 39714.60 | 34929.000 | 12.179 |
| 881.05 | 0.999   | 13.834 | 14.601  | -5.546 | 45.143 | 39.644 | 12.180 | 39759.80 | 34967.700 | 12.182 |
| 882.05 | 0.999   | 13.834 | 14.601  | -5.546 | 45.143 | 39.644 | 12.180 | 39805.00 | 35008.300 | 12.179 |
| 883.05 | 0.999   | 13.834 | 14.601  | -5.546 | 45.143 | 39.645 | 12.180 | 39850.20 | 35047.100 | 12.181 |
| 884.05 | 0.999   | 13.834 | 14.601  | -5.546 | 45.143 | 39.645 | 12.180 | 39895.40 | 35087.800 | 12.179 |
| 885.05 | 0.999   | 13.834 | 14.601  | -5.547 | 45.143 | 39.645 | 12.179 | 39940.60 | 35126.900 | 12.180 |
| 886.05 | 0.999   | 13.834 | 14.601  | -5.547 | 45.143 | 39.645 | 12.179 | 39985.80 | 35167.800 | 12.177 |
| 887.05 | 0.999   | 13.834 | 14.601  | -5.547 | 45.143 | 39.645 | 12.179 | 40031.00 | 35207.000 | 12.178 |
| 888.05 | 0.999   | 13.834 | 14.601  | -5.547 | 45.143 | 39.645 | 12.179 | 40076.20 | 35246.300 | 12.179 |
| 889.05 | 0.999   | 13.834 | 14.601  | -5.547 | 45.143 | 39.645 | 12.179 | 40121.40 | 35285.600 | 12.180 |
| 890.05 | 0.999   | 13.834 | 14.601  | -5.547 | 45.143 | 39.645 | 12.178 | 40166.60 | 35325.100 | 12.180 |
| 891.05 | 0.999   | 13.834 | 14.601  | -5.547 | 45.143 | 39.645 | 12.178 | 40211.80 | 35366.500 | 12.176 |
| 892.05 | 0.999   | 13.834 | 14.601  | -5.547 | 45.143 | 39.645 | 12.178 | 40257.00 | 35406.100 | 12.176 |
| 893.05 | 0.999   | 13.834 | 14.601  | -5.548 | 45.143 | 39.646 | 12.178 | 40302.20 | 35445.800 | 12.176 |
| 894.05 | 0.999   | 13.834 | 14.601  | -5.548 | 45.143 | 39.646 | 12.177 | 40347.40 | 35485.600 | 12.175 |
| 895.05 | 0.999   | 13.834 | 14.601  | -5.548 | 45.143 | 39.646 | 12.177 | 40392.60 | 35523.600 | 12.179 |
| 896.05 | 0.999   | 13.834 | 14.601  | -5.548 | 45.143 | 39.646 | 12.177 | 40437.80 | 35563.600 | 12.179 |
| 897.05 | 0.999   | 13.834 | 14.601  | -5.548 | 45.143 | 39.646 | 12.177 | 40483.00 | 35603.600 | 12.178 |
| 898.05 | 0.999   | 13.834 | 14.601  | -5.548 | 45.143 | 39.646 | 12.177 | 40528.20 | 35643.800 | 12.176 |
| 899.05 | 0.999   | 13.834 | 14.601  | -5.548 | 45.143 | 39.646 | 12.176 | 40573.40 | 35684.000 | 12.175 |

| Z      | $z/(1+z)$ | LTD LC | LTD HHC | %Error | CD LC  | CD HHC | %Error | LD LC    | LD HHC    | %Error |
|--------|-----------|--------|---------|--------|--------|--------|--------|----------|-----------|--------|
| (1)    | (2)       | (3)    | (4)     | (5)    | (6)    | (7)    | (8)    | (9)      | (10)      | (11)   |
| 900.05 | 0.999     | 13.834 | 14.601  | -5.549 | 45.143 | 39.646 | 12.176 | 40675.90 | 35722.400 | 12.178 |
| 901.05 | 0.999     | 13.834 | 14.601  | -5.549 | 45.143 | 39.646 | 12.176 | 40721.00 | 35762.900 | 12.176 |
| 902.05 | 0.999     | 13.834 | 14.601  | -5.549 | 45.143 | 39.646 | 12.176 | 40766.20 | 35803.400 | 12.174 |
| 903.05 | 0.999     | 13.834 | 14.601  | -5.549 | 45.143 | 39.646 | 12.176 | 40811.30 | 35842.100 | 12.176 |
| 904.05 | 0.999     | 13.834 | 14.601  | -5.549 | 45.143 | 39.647 | 12.175 | 40856.50 | 35882.800 | 12.174 |
| 905.05 | 0.999     | 13.834 | 14.601  | -5.549 | 45.143 | 39.647 | 12.175 | 40901.60 | 35921.600 | 12.176 |
| 906.05 | 0.999     | 13.834 | 14.601  | -5.549 | 45.143 | 39.647 | 12.175 | 40946.80 | 35962.500 | 12.173 |
| 907.05 | 0.999     | 13.834 | 14.601  | -5.549 | 45.143 | 39.647 | 12.175 | 40991.90 | 36001.500 | 12.174 |
| 908.05 | 0.999     | 13.834 | 14.601  | -5.550 | 45.143 | 39.647 | 12.174 | 41037.00 | 36040.600 | 12.176 |
| 909.05 | 0.999     | 13.834 | 14.601  | -5.550 | 45.143 | 39.647 | 12.174 | 41082.20 | 36081.700 | 12.172 |
| 910.05 | 0.999     | 13.834 | 14.601  | -5.550 | 45.143 | 39.647 | 12.174 | 41127.30 | 36121.000 | 12.173 |
| 911.05 | 0.999     | 13.834 | 14.601  | -5.550 | 45.143 | 39.647 | 12.174 | 41172.50 | 36160.400 | 12.173 |
| 912.05 | 0.999     | 13.834 | 14.601  | -5.550 | 45.143 | 39.647 | 12.174 | 41217.60 | 36199.800 | 12.174 |
| 913.05 | 0.999     | 13.834 | 14.601  | -5.550 | 45.143 | 39.647 | 12.173 | 41262.80 | 36239.300 | 12.174 |
| 914.05 | 0.999     | 13.834 | 14.601  | -5.550 | 45.143 | 39.648 | 12.173 | 41307.90 | 36278.900 | 12.174 |
| 915.05 | 0.999     | 13.834 | 14.602  | -5.550 | 45.143 | 39.648 | 12.173 | 41353.00 | 36318.700 | 12.174 |
| 916.05 | 0.999     | 13.834 | 14.602  | -5.551 | 45.143 | 39.648 | 12.173 | 41398.20 | 36358.400 | 12.174 |
| 917.05 | 0.999     | 13.834 | 14.602  | -5.551 | 45.143 | 39.648 | 12.173 | 41443.30 | 36398.300 | 12.173 |
| 918.05 | 0.999     | 13.834 | 14.602  | -5.551 | 45.143 | 39.648 | 12.172 | 41488.50 | 36438.300 | 12.173 |
| 919.05 | 0.999     | 13.834 | 14.602  | -5.551 | 45.143 | 39.648 | 12.172 | 41533.60 | 36478.300 | 12.172 |
| 920.05 | 0.999     | 13.834 | 14.602  | -5.551 | 45.143 | 39.648 | 12.172 | 41578.80 | 36518.500 | 12.170 |
| 921.05 | 0.999     | 13.834 | 14.602  | -5.551 | 45.143 | 39.648 | 12.172 | 41623.90 | 36556.700 | 12.174 |
| 922.05 | 0.999     | 13.834 | 14.602  | -5.551 | 45.143 | 39.648 | 12.172 | 41669.00 | 36597.000 | 12.172 |
| 923.05 | 0.999     | 13.834 | 14.602  | -5.551 | 45.143 | 39.648 | 12.171 | 41714.20 | 36637.400 | 12.170 |
| 924.05 | 0.999     | 13.834 | 14.602  | -5.552 | 45.143 | 39.648 | 12.171 | 41759.30 | 36675.900 | 12.173 |
| 925.05 | 0.999     | 13.834 | 14.602  | -5.552 | 45.143 | 39.649 | 12.171 | 41804.50 | 36716.400 | 12.171 |
| 926.05 | 0.999     | 13.834 | 14.602  | -5.552 | 45.143 | 39.649 | 12.171 | 41849.60 | 36757.100 | 12.169 |
| 927.05 | 0.999     | 13.834 | 14.602  | -5.552 | 45.143 | 39.649 | 12.170 | 41894.80 | 36795.800 | 12.171 |
| 928.05 | 0.999     | 13.834 | 14.602  | -5.552 | 45.143 | 39.649 | 12.170 | 41939.90 | 36836.700 | 12.168 |
| 929.05 | 0.999     | 13.834 | 14.602  | -5.552 | 45.143 | 39.649 | 12.170 | 41985.00 | 36875.500 | 12.170 |
| 930.05 | 0.999     | 13.834 | 14.602  | -5.552 | 45.143 | 39.649 | 12.170 | 42030.20 | 36914.500 | 12.171 |
| 931.05 | 0.999     | 13.834 | 14.602  | -5.552 | 45.143 | 39.649 | 12.170 | 42075.30 | 36955.600 | 12.168 |
| 932.05 | 0.999     | 13.834 | 14.602  | -5.553 | 45.143 | 39.649 | 12.169 | 42120.50 | 36994.800 | 12.169 |
| 933.05 | 0.999     | 13.834 | 14.602  | -5.553 | 45.143 | 39.649 | 12.169 | 42165.60 | 37034.000 | 12.170 |
| 934.05 | 0.999     | 13.834 | 14.602  | -5.553 | 45.143 | 39.649 | 12.169 | 42210.80 | 37073.300 | 12.171 |
| 935.05 | 0.999     | 13.834 | 14.602  | -5.553 | 45.143 | 39.649 | 12.169 | 42255.90 | 37114.700 | 12.167 |
| 936.05 | 0.999     | 13.834 | 14.602  | -5.553 | 45.143 | 39.650 | 12.169 | 42301.00 | 37154.200 | 12.167 |
| 937.05 | 0.999     | 13.834 | 14.602  | -5.553 | 45.143 | 39.650 | 12.168 | 42346.20 | 37193.800 | 12.167 |
| 938.05 | 0.999     | 13.834 | 14.602  | -5.553 | 45.143 | 39.650 | 12.168 | 42391.30 | 37233.400 | 12.167 |
| 939.05 | 0.999     | 13.834 | 14.602  | -5.553 | 45.143 | 39.650 | 12.168 | 42436.50 | 37273.100 | 12.167 |
| 940.05 | 0.999     | 13.834 | 14.602  | -5.554 | 45.143 | 39.650 | 12.168 | 42481.60 | 37312.900 | 12.167 |
| 941.05 | 0.999     | 13.834 | 14.602  | -5.554 | 45.143 | 39.650 | 12.168 | 42526.80 | 37352.800 | 12.166 |
| 942.05 | 0.999     | 13.834 | 14.602  | -5.554 | 45.143 | 39.650 | 12.167 | 42571.90 | 37392.800 | 12.166 |
| 943.05 | 0.999     | 13.834 | 14.602  | -5.554 | 45.143 | 39.650 | 12.167 | 42617.00 | 37430.700 | 12.170 |
| 944.05 | 0.999     | 13.834 | 14.602  | -5.554 | 45.143 | 39.650 | 12.167 | 42662.20 | 37470.900 | 12.168 |
| 945.05 | 0.999     | 13.834 | 14.602  | -5.554 | 45.143 | 39.650 | 12.167 | 42707.30 | 37511.100 | 12.167 |
| 946.05 | 0.999     | 13.834 | 14.602  | -5.554 | 45.143 | 39.650 | 12.167 | 42752.50 | 37551.400 | 12.165 |
| 947.05 | 0.999     | 13.834 | 14.602  | -5.554 | 45.143 | 39.651 | 12.166 | 42797.60 | 37589.700 | 12.169 |
| 948.05 | 0.999     | 13.834 | 14.602  | -5.554 | 45.143 | 39.651 | 12.166 | 42842.80 | 37630.200 | 12.167 |
| 949.05 | 0.999     | 13.834 | 14.602  | -5.555 | 45.143 | 39.651 | 12.166 | 42887.90 | 37670.800 | 12.165 |
| 950.05 | 0.999     | 13.834 | 14.602  | -5.555 | 45.143 | 39.651 | 12.166 | 42933.00 | 37709.300 | 12.167 |
| 951.05 | 0.999     | 13.834 | 14.602  | -5.555 | 45.143 | 39.651 | 12.166 | 42978.20 | 37750.000 | 12.165 |
| 952.05 | 0.999     | 13.834 | 14.602  | -5.554 | 45.213 | 39.651 | 12.302 | 43090.50 | 37788.700 | 12.304 |
| 953.05 | 0.999     | 13.834 | 14.602  | -5.554 | 45.213 | 39.651 | 12.302 | 43135.70 | 37829.600 | 12.301 |
| 954.05 | 0.999     | 13.834 | 14.602  | -5.555 | 45.213 | 39.651 | 12.302 | 43180.90 | 37868.500 | 12.303 |
| 955.05 | 0.999     | 13.834 | 14.602  | -5.555 | 45.213 | 39.651 | 12.302 | 43226.20 | 37909.600 | 12.300 |
| 956.05 | 0.999     | 13.834 | 14.602  | -5.555 | 45.213 | 39.651 | 12.302 | 43271.40 | 37948.600 | 12.301 |
| 957.05 | 0.999     | 13.834 | 14.602  | -5.555 | 45.213 | 39.651 | 12.302 | 43316.60 | 37987.700 | 12.302 |
| 958.05 | 0.999     | 13.834 | 14.602  | -5.555 | 45.213 | 39.652 | 12.301 | 43361.80 | 38026.800 | 12.303 |
| 959.05 | 0.999     | 13.834 | 14.602  | -5.555 | 45.213 | 39.652 | 12.301 | 43407.00 | 38068.300 | 12.299 |
| 960.05 | 0.999     | 13.834 | 14.602  | -5.555 | 45.213 | 39.652 | 12.301 | 43452.20 | 38107.600 | 12.300 |
| 961.05 | 0.999     | 13.834 | 14.602  | -5.555 | 45.213 | 39.652 | 12.301 | 43497.40 | 38147.000 | 12.301 |
| 962.05 | 0.999     | 13.834 | 14.602  | -5.556 | 45.213 | 39.652 | 12.301 | 43542.60 | 38186.500 | 12.301 |
| 963.05 | 0.999     | 13.834 | 14.602  | -5.556 | 45.213 | 39.652 | 12.300 | 43587.90 | 38226.100 | 12.301 |
| 964.05 | 0.999     | 13.834 | 14.602  | -5.556 | 45.213 | 39.652 | 12.300 | 43633.10 | 38265.700 | 12.301 |
| 965.05 | 0.999     | 13.834 | 14.602  | -5.556 | 45.213 | 39.652 | 12.300 | 43678.30 | 38305.500 | 12.301 |
| 966.05 | 0.999     | 13.834 | 14.602  | -5.556 | 45.213 | 39.652 | 12.300 | 43723.50 | 38345.300 | 12.301 |

| Z       | z/(1+z) | LTD LC | LTD HHC | %Error | CD LC  | CD HHC | %Error | LD LC    | LD HHC    | %Error |
|---------|---------|--------|---------|--------|--------|--------|--------|----------|-----------|--------|
| (1)     | (2)     | (3)    | (4)     | (5)    | (6)    | (7)    | (8)    | (9)      | (10)      | (11)   |
| 967.05  | 0.999   | 13.834 | 14.602  | -5.556 | 45.213 | 39.652 | 12.300 | 43768.70 | 38385.200 | 12.300 |
| 968.05  | 0.999   | 13.834 | 14.602  | -5.556 | 45.213 | 39.652 | 12.299 | 43813.90 | 38425.200 | 12.299 |
| 969.05  | 0.999   | 13.834 | 14.602  | -5.556 | 45.213 | 39.652 | 12.299 | 43859.10 | 38465.300 | 12.298 |
| 970.05  | 0.999   | 13.834 | 14.602  | -5.556 | 45.213 | 39.653 | 12.299 | 43904.40 | 38505.400 | 12.297 |
| 971.05  | 0.999   | 13.834 | 14.602  | -5.557 | 45.213 | 39.653 | 12.299 | 43949.60 | 38543.400 | 12.301 |
| 972.05  | 0.999   | 13.834 | 14.602  | -5.557 | 45.213 | 39.653 | 12.299 | 43994.80 | 38583.800 | 12.299 |
| 973.05  | 0.999   | 13.834 | 14.602  | -5.557 | 45.213 | 39.653 | 12.299 | 44040.00 | 38624.200 | 12.298 |
| 974.05  | 0.999   | 13.834 | 14.602  | -5.557 | 45.213 | 39.653 | 12.298 | 44085.20 | 38662.400 | 12.301 |
| 975.05  | 0.999   | 13.834 | 14.602  | -5.557 | 45.213 | 39.653 | 12.298 | 44130.40 | 38703.000 | 12.299 |
| 976.05  | 0.999   | 13.834 | 14.603  | -5.557 | 45.213 | 39.653 | 12.298 | 44175.60 | 38743.600 | 12.296 |
| 977.05  | 0.999   | 13.834 | 14.603  | -5.557 | 45.213 | 39.653 | 12.298 | 44220.80 | 38782.100 | 12.299 |
| 978.05  | 0.999   | 13.834 | 14.603  | -5.557 | 45.213 | 39.653 | 12.298 | 44266.10 | 38822.900 | 12.296 |
| 979.05  | 0.999   | 13.834 | 14.603  | -5.557 | 45.213 | 39.653 | 12.297 | 44311.30 | 38861.600 | 12.299 |
| 980.05  | 0.999   | 13.834 | 14.603  | -5.558 | 45.213 | 39.653 | 12.297 | 44356.50 | 38902.500 | 12.296 |
| 981.05  | 0.999   | 13.834 | 14.603  | -5.558 | 45.213 | 39.653 | 12.297 | 44401.70 | 38941.300 | 12.298 |
| 982.05  | 0.999   | 13.834 | 14.603  | -5.558 | 45.213 | 39.654 | 12.297 | 44446.90 | 38982.500 | 12.294 |
| 983.05  | 0.999   | 13.834 | 14.603  | -5.558 | 45.213 | 39.654 | 12.297 | 44492.10 | 39021.400 | 12.296 |
| 984.05  | 0.999   | 13.834 | 14.603  | -5.558 | 45.213 | 39.654 | 12.296 | 44537.30 | 39060.500 | 12.297 |
| 985.05  | 0.999   | 13.834 | 14.603  | -5.558 | 45.213 | 39.654 | 12.296 | 44582.60 | 39099.600 | 12.299 |
| 986.05  | 0.999   | 13.834 | 14.603  | -5.558 | 45.213 | 39.654 | 12.296 | 44627.80 | 39141.100 | 12.294 |
| 987.05  | 0.999   | 13.834 | 14.603  | -5.558 | 45.213 | 39.654 | 12.296 | 44673.00 | 39180.300 | 12.295 |
| 988.05  | 0.999   | 13.834 | 14.603  | -5.558 | 45.213 | 39.654 | 12.296 | 44718.20 | 39219.700 | 12.296 |
| 989.05  | 0.999   | 13.834 | 14.603  | -5.559 | 45.213 | 39.654 | 12.296 | 44763.40 | 39259.100 | 12.296 |
| 990.05  | 0.999   | 13.834 | 14.603  | -5.559 | 45.213 | 39.654 | 12.295 | 44808.60 | 39298.600 | 12.297 |
| 991.05  | 0.999   | 13.834 | 14.603  | -5.559 | 45.213 | 39.654 | 12.295 | 44853.80 | 39338.200 | 12.297 |
| 992.05  | 0.999   | 13.834 | 14.603  | -5.559 | 45.213 | 39.654 | 12.295 | 44899.00 | 39377.800 | 12.297 |
| 993.05  | 0.999   | 13.834 | 14.603  | -5.559 | 45.213 | 39.654 | 12.295 | 44944.30 | 39417.600 | 12.297 |
| 994.05  | 0.999   | 13.834 | 14.603  | -5.559 | 45.213 | 39.655 | 12.295 | 44989.50 | 39457.400 | 12.296 |
| 995.05  | 0.999   | 13.834 | 14.603  | -5.559 | 45.213 | 39.655 | 12.295 | 45034.70 | 39497.300 | 12.296 |
| 996.05  | 0.999   | 13.834 | 14.603  | -5.559 | 45.213 | 39.655 | 12.294 | 45079.90 | 39537.300 | 12.295 |
| 997.05  | 0.999   | 13.834 | 14.603  | -5.559 | 45.213 | 39.655 | 12.294 | 45125.10 | 39577.400 | 12.294 |
| 998.05  | 0.999   | 13.834 | 14.603  | -5.559 | 45.213 | 39.655 | 12.294 | 45170.30 | 39617.500 | 12.293 |
| 999.05  | 0.999   | 13.834 | 14.603  | -5.560 | 45.213 | 39.655 | 12.294 | 45215.50 | 39657.700 | 12.292 |
| 1000.05 | 0.999   | 13.834 | 14.603  | -5.560 | 45.213 | 39.655 | 12.294 | 45260.80 | 39695.700 | 12.296 |
| 1001.05 | 0.999   | 13.834 | 14.603  | -5.560 | 45.213 | 39.655 | 12.293 | 45306.00 | 39736.100 | 12.294 |
| 1002.05 | 0.999   | 13.834 | 14.603  | -5.560 | 45.213 | 39.655 | 12.293 | 45351.20 | 39776.500 | 12.292 |
| 1003.05 | 0.999   | 13.834 | 14.603  | -5.560 | 45.213 | 39.655 | 12.293 | 45396.40 | 39814.700 | 12.296 |
| 1004.05 | 0.999   | 13.834 | 14.603  | -5.560 | 45.213 | 39.655 | 12.293 | 45441.60 | 39855.300 | 12.293 |
| 1005.05 | 0.999   | 13.834 | 14.603  | -5.560 | 45.213 | 39.655 | 12.293 | 45486.80 | 39896.000 | 12.291 |
| 1006.05 | 0.999   | 13.834 | 14.603  | -5.560 | 45.213 | 39.655 | 12.293 | 45532.00 | 39934.400 | 12.294 |
| 1007.05 | 0.999   | 13.834 | 14.603  | -5.560 | 45.213 | 39.656 | 12.292 | 45577.20 | 39975.300 | 12.291 |
| 1008.05 | 0.999   | 13.834 | 14.603  | -5.561 | 45.213 | 39.656 | 12.292 | 45622.50 | 40013.800 | 12.294 |
| 1009.05 | 0.999   | 13.834 | 14.603  | -5.561 | 45.213 | 39.656 | 12.292 | 45667.70 | 40054.900 | 12.291 |
| 1010.05 | 0.999   | 13.834 | 14.603  | -5.561 | 45.213 | 39.656 | 12.292 | 45712.90 | 40093.600 | 12.293 |
| 1011.05 | 0.999   | 13.834 | 14.603  | -5.561 | 45.213 | 39.656 | 12.292 | 45758.10 | 40134.800 | 12.289 |
| 1012.05 | 0.999   | 13.834 | 14.603  | -5.561 | 45.213 | 39.656 | 12.292 | 45803.30 | 40173.600 | 12.291 |
| 1013.05 | 0.999   | 13.834 | 14.603  | -5.561 | 45.213 | 39.656 | 12.291 | 45848.50 | 40212.500 | 12.293 |
| 1014.05 | 0.999   | 13.834 | 14.603  | -5.561 | 45.213 | 39.656 | 12.291 | 45893.70 | 40254.000 | 12.289 |
| 1015.05 | 0.999   | 13.834 | 14.603  | -5.561 | 45.213 | 39.656 | 12.291 | 45939.00 | 40293.100 | 12.290 |
| 1016.05 | 0.999   | 13.834 | 14.603  | -5.561 | 45.213 | 39.656 | 12.291 | 45984.20 | 40332.200 | 12.291 |
| 1017.05 | 0.999   | 13.834 | 14.603  | -5.561 | 45.213 | 39.656 | 12.291 | 46029.40 | 40371.500 | 12.292 |
| 1018.05 | 0.999   | 13.834 | 14.603  | -5.562 | 45.213 | 39.656 | 12.291 | 46074.60 | 40410.800 | 12.293 |
| 1019.05 | 0.999   | 13.834 | 14.603  | -5.562 | 45.213 | 39.656 | 12.290 | 46119.80 | 40452.600 | 12.288 |
| 1020.05 | 0.999   | 13.834 | 14.603  | -5.562 | 45.213 | 39.657 | 12.290 | 46165.00 | 40492.100 | 12.288 |
| 1021.05 | 0.999   | 13.834 | 14.603  | -5.562 | 45.213 | 39.657 | 12.290 | 46210.20 | 40531.600 | 12.289 |
| 1022.05 | 0.999   | 13.834 | 14.603  | -5.562 | 45.213 | 39.657 | 12.290 | 46255.40 | 40571.300 | 12.289 |
| 1023.05 | 0.999   | 13.834 | 14.603  | -5.562 | 45.213 | 39.657 | 12.290 | 46300.70 | 40611.000 | 12.289 |
| 1024.05 | 0.999   | 13.834 | 14.603  | -5.562 | 45.213 | 39.657 | 12.290 | 46345.90 | 40650.700 | 12.288 |
| 1025.05 | 0.999   | 13.834 | 14.603  | -5.562 | 45.213 | 39.657 | 12.289 | 46391.10 | 40690.600 | 12.288 |
| 1026.05 | 0.999   | 13.834 | 14.603  | -5.562 | 45.213 | 39.657 | 12.289 | 46436.30 | 40730.500 | 12.287 |
| 1027.05 | 0.999   | 13.834 | 14.603  | -5.562 | 45.213 | 39.657 | 12.289 | 46481.50 | 40770.500 | 12.287 |
| 1028.05 | 0.999   | 13.834 | 14.603  | -5.563 | 45.213 | 39.657 | 12.289 | 46526.70 | 40808.100 | 12.291 |
| 1029.05 | 0.999   | 13.834 | 14.603  | -5.563 | 45.213 | 39.657 | 12.289 | 46571.90 | 40848.300 | 12.290 |
| 1030.05 | 0.999   | 13.834 | 14.603  | -5.563 | 45.213 | 39.657 | 12.289 | 46617.20 | 40888.500 | 12.289 |
| 1031.05 | 0.999   | 13.834 | 14.603  | -5.563 | 45.213 | 39.657 | 12.288 | 46662.40 | 40928.900 | 12.287 |
| 1032.05 | 0.999   | 13.834 | 14.603  | -5.563 | 45.213 | 39.657 | 12.288 | 46707.60 | 40969.300 | 12.286 |
| 1033.05 | 0.999   | 13.834 | 14.603  | -5.563 | 45.213 | 39.658 | 12.288 | 46752.80 | 41007.200 | 12.289 |

| Z       | z/(1+z) | LTD LC | LTD HHC | %Error | CD LC  | CD HHC | %Error | LD LC    | LD HHC    | %Error |
|---------|---------|--------|---------|--------|--------|--------|--------|----------|-----------|--------|
| (1)     | (2)     | (3)    | (4)     | (5)    | (6)    | (7)    | (8)    | (9)      | (10)      | (11)   |
| 1034.05 | 0.999   | 13.834 | 14.603  | -5.563 | 45.213 | 39.658 | 12.288 | 46798.00 | 41047.800 | 12.287 |
| 1035.05 | 0.999   | 13.834 | 14.603  | -5.563 | 45.213 | 39.658 | 12.288 | 46843.20 | 41088.400 | 12.285 |
| 1036.05 | 0.999   | 13.834 | 14.603  | -5.563 | 45.213 | 39.658 | 12.288 | 46888.40 | 41126.600 | 12.289 |
| 1037.05 | 0.999   | 13.834 | 14.603  | -5.563 | 45.213 | 39.658 | 12.287 | 46933.60 | 41167.400 | 12.286 |
| 1038.05 | 0.999   | 13.834 | 14.603  | -5.564 | 45.213 | 39.658 | 12.287 | 46978.90 | 41205.700 | 12.289 |
| 1039.05 | 0.999   | 13.834 | 14.603  | -5.564 | 45.213 | 39.658 | 12.287 | 47024.10 | 41246.600 | 12.286 |
| 1040.05 | 0.999   | 13.834 | 14.603  | -5.564 | 45.213 | 39.658 | 12.287 | 47069.30 | 41285.100 | 12.289 |
| 1041.05 | 0.999   | 13.834 | 14.603  | -5.564 | 45.213 | 39.658 | 12.287 | 47114.50 | 41326.200 | 12.286 |
| 1042.05 | 0.999   | 13.834 | 14.603  | -5.564 | 45.213 | 39.658 | 12.287 | 47159.70 | 41364.800 | 12.288 |
| 1043.05 | 0.999   | 13.834 | 14.603  | -5.564 | 45.213 | 39.658 | 12.286 | 47204.90 | 41406.100 | 12.284 |
| 1044.05 | 0.999   | 13.834 | 14.603  | -5.564 | 45.213 | 39.658 | 12.286 | 47250.10 | 41444.800 | 12.286 |
| 1045.05 | 0.999   | 13.834 | 14.603  | -5.564 | 45.213 | 39.658 | 12.286 | 47295.40 | 41483.700 | 12.288 |
| 1046.05 | 0.999   | 13.834 | 14.604  | -5.564 | 45.213 | 39.658 | 12.286 | 47340.60 | 41525.200 | 12.284 |
| 1047.05 | 0.999   | 13.834 | 14.604  | -5.564 | 45.213 | 39.659 | 12.286 | 47385.80 | 41564.200 | 12.286 |
| 1048.05 | 0.999   | 13.834 | 14.604  | -5.565 | 45.213 | 39.659 | 12.286 | 47431.00 | 41603.200 | 12.287 |
| 1049.05 | 0.999   | 13.834 | 14.604  | -5.565 | 45.213 | 39.659 | 12.285 | 47476.20 | 41642.400 | 12.288 |
| 1050.05 | 0.999   | 13.834 | 14.604  | -5.565 | 45.213 | 39.659 | 12.285 | 47521.40 | 41684.200 | 12.283 |
| 1051.05 | 0.999   | 13.834 | 14.604  | -5.565 | 45.213 | 39.659 | 12.285 | 47566.60 | 41723.500 | 12.284 |
| 1052.05 | 0.999   | 13.834 | 14.604  | -5.564 | 45.287 | 39.659 | 12.427 | 47689.00 | 41762.800 | 12.427 |
| 1053.05 | 0.999   | 13.834 | 14.604  | -5.564 | 45.287 | 39.659 | 12.427 | 47734.30 | 41802.200 | 12.427 |
| 1054.05 | 0.999   | 13.834 | 14.604  | -5.565 | 45.287 | 39.659 | 12.427 | 47779.60 | 41841.800 | 12.428 |
| 1055.05 | 0.999   | 13.834 | 14.604  | -5.565 | 45.287 | 39.659 | 12.426 | 47824.90 | 41881.300 | 12.428 |
| 1056.05 | 0.999   | 13.834 | 14.604  | -5.565 | 45.287 | 39.659 | 12.426 | 47870.20 | 41921.000 | 12.428 |
| 1057.05 | 0.999   | 13.834 | 14.604  | -5.565 | 45.287 | 39.659 | 12.426 | 47915.40 | 41960.700 | 12.428 |
| 1058.05 | 0.999   | 13.834 | 14.604  | -5.565 | 45.287 | 39.659 | 12.426 | 47960.70 | 42000.500 | 12.427 |
| 1059.05 | 0.999   | 13.834 | 14.604  | -5.565 | 45.287 | 39.659 | 12.426 | 48006.00 | 42040.400 | 12.427 |
| 1060.05 | 0.999   | 13.834 | 14.604  | -5.565 | 45.287 | 39.659 | 12.426 | 48051.30 | 42080.400 | 12.426 |
| 1061.05 | 0.999   | 13.834 | 14.604  | -5.565 | 45.287 | 39.660 | 12.426 | 48096.60 | 42120.400 | 12.425 |
| 1062.05 | 0.999   | 13.834 | 14.604  | -5.565 | 45.287 | 39.660 | 12.425 | 48141.90 | 42160.500 | 12.425 |
| 1063.05 | 0.999   | 13.834 | 14.604  | -5.565 | 45.287 | 39.660 | 12.425 | 48187.20 | 42200.700 | 12.423 |
| 1064.05 | 0.999   | 13.834 | 14.604  | -5.566 | 45.287 | 39.660 | 12.425 | 48232.50 | 42238.300 | 12.428 |
| 1065.05 | 0.999   | 13.834 | 14.604  | -5.566 | 45.287 | 39.660 | 12.425 | 48277.70 | 42278.600 | 12.426 |
| 1066.05 | 0.999   | 13.834 | 14.604  | -5.566 | 45.287 | 39.660 | 12.425 | 48323.00 | 42319.000 | 12.425 |
| 1067.05 | 0.999   | 13.834 | 14.604  | -5.566 | 45.287 | 39.660 | 12.425 | 48368.30 | 42359.500 | 12.423 |
| 1068.05 | 0.999   | 13.834 | 14.604  | -5.566 | 45.287 | 39.660 | 12.424 | 48413.60 | 42397.400 | 12.427 |
| 1069.05 | 0.999   | 13.834 | 14.604  | -5.566 | 45.287 | 39.660 | 12.424 | 48458.90 | 42438.000 | 12.425 |
| 1070.05 | 0.999   | 13.834 | 14.604  | -5.566 | 45.287 | 39.660 | 12.424 | 48504.20 | 42478.700 | 12.423 |
| 1071.05 | 0.999   | 13.834 | 14.604  | -5.566 | 45.287 | 39.660 | 12.424 | 48549.50 | 42516.800 | 12.426 |
| 1072.05 | 0.999   | 13.834 | 14.604  | -5.566 | 45.287 | 39.660 | 12.424 | 48594.80 | 42557.600 | 12.423 |
| 1073.05 | 0.999   | 13.834 | 14.604  | -5.566 | 45.287 | 39.660 | 12.424 | 48640.00 | 42595.900 | 12.426 |
| 1074.05 | 0.999   | 13.834 | 14.604  | -5.566 | 45.287 | 39.660 | 12.424 | 48685.30 | 42636.900 | 12.424 |
| 1075.05 | 0.999   | 13.834 | 14.604  | -5.567 | 45.287 | 39.661 | 12.423 | 48730.60 | 42678.000 | 12.421 |
| 1076.05 | 0.999   | 13.834 | 14.604  | -5.567 | 45.287 | 39.661 | 12.423 | 48775.90 | 42716.400 | 12.423 |
| 1077.05 | 0.999   | 13.834 | 14.604  | -5.567 | 45.287 | 39.661 | 12.423 | 48821.20 | 42754.900 | 12.426 |
| 1078.05 | 0.999   | 13.834 | 14.604  | -5.567 | 45.287 | 39.661 | 12.423 | 48866.50 | 42796.200 | 12.422 |
| 1079.05 | 0.999   | 13.834 | 14.604  | -5.567 | 45.287 | 39.661 | 12.423 | 48911.80 | 42834.900 | 12.424 |
| 1080.05 | 0.999   | 13.834 | 14.604  | -5.567 | 45.287 | 39.661 | 12.423 | 48957.00 | 42876.300 | 12.421 |
| 1081.05 | 0.999   | 13.834 | 14.604  | -5.567 | 45.287 | 39.661 | 12.422 | 49002.30 | 42915.100 | 12.422 |
| 1082.05 | 0.999   | 13.834 | 14.604  | -5.567 | 45.287 | 39.661 | 12.422 | 49047.60 | 42954.000 | 12.424 |
| 1083.05 | 0.999   | 13.834 | 14.604  | -5.567 | 45.287 | 39.661 | 12.422 | 49092.90 | 42995.700 | 12.420 |
| 1084.05 | 0.999   | 13.834 | 14.604  | -5.567 | 45.287 | 39.661 | 12.422 | 49138.20 | 43034.700 | 12.421 |
| 1085.05 | 0.999   | 13.834 | 14.604  | -5.567 | 45.287 | 39.661 | 12.422 | 49183.50 | 43073.800 | 12.422 |
| 1086.05 | 0.999   | 13.834 | 14.604  | -5.568 | 45.287 | 39.661 | 12.422 | 49228.80 | 43112.900 | 12.423 |
| 1087.05 | 0.999   | 13.834 | 14.604  | -5.568 | 45.287 | 39.661 | 12.422 | 49274.00 | 43152.100 | 12.424 |
| 1088.05 | 0.999   | 13.834 | 14.604  | -5.568 | 45.287 | 39.661 | 12.421 | 49319.30 | 43194.200 | 12.419 |
| 1089.05 | 0.999   | 13.834 | 14.604  | -5.568 | 45.287 | 39.661 | 12.421 | 49364.60 | 43233.600 | 12.420 |
| 1090.05 | 0.999   | 13.834 | 14.604  | -5.568 | 45.287 | 39.662 | 12.421 | 49409.90 | 43273.000 | 12.420 |
| 1091.05 | 0.999   | 13.834 | 14.604  | -5.568 | 45.287 | 39.662 | 12.421 | 49455.20 | 43312.500 | 12.421 |
| 1092.05 | 0.999   | 13.834 | 14.604  | -5.568 | 45.287 | 39.662 | 12.421 | 49500.50 | 43352.100 | 12.421 |
| 1093.05 | 0.999   | 13.834 | 14.604  | -5.568 | 45.287 | 39.662 | 12.421 | 49545.80 | 43391.800 | 12.421 |
| 1094.05 | 0.999   | 13.834 | 14.604  | -5.568 | 45.287 | 39.662 | 12.421 | 49591.10 | 43431.500 | 12.421 |
| 1095.05 | 0.999   | 13.834 | 14.604  | -5.568 | 45.287 | 39.662 | 12.420 | 49636.30 | 43471.300 | 12.421 |
| 1096.05 | 0.999   | 13.834 | 14.604  | -5.568 | 45.287 | 39.662 | 12.420 | 49681.60 | 43511.100 | 12.420 |
| 1097.05 | 0.999   | 13.834 | 14.604  | -5.568 | 45.287 | 39.662 | 12.420 | 49726.90 | 43551.100 | 12.420 |
| 1098.05 | 0.999   | 13.834 | 14.604  | -5.569 | 45.287 | 39.662 | 12.420 | 49772.20 | 43591.100 | 12.419 |
| 1099.05 | 0.999   | 13.834 | 14.604  | -5.569 | 45.287 | 39.662 | 12.420 | 49817.50 | 43631.200 | 12.418 |
| 1100.05 | 0.999   | 13.834 | 14.604  | -5.569 | 45.287 | 39.662 | 12.420 | 49862.80 | 43671.300 | 12.417 |

## 8. Conclusion

By modifying our recently proposed light speed expanding Hubble-Hawking universe, in this paper we are presenting a very simple model of light speed rotating universe with a possible halt. It is absolutely against to the current notion of accelerating universe and dark energy. In this context, we would like to appeal that, based on the rate of decrease in current and future cosmic temperature, our proposal can be verified. Proceeding further, so far, no single cosmological observation has shed light the direct existence of dark energy and no single observation has reported a direct measure of galactic receding speed and direct measure of galactic accelerating speed. Point to be noted is that, whether galaxy is receding or revolving about a center also is not clear. It's a general and commonly followed belief that galactic distance is a measure of galactic receding speed. It may be noted that, based on proposed red shift definition, Hubble's law can be considered as a representation of ending stage of cosmic expansion having light speed rotation.

We agree that, in this paper, we are not providing sufficient cosmological explanation for the reasons of current cosmic halt, but it may be noted that factors like initial high cosmic expansion speed, decelerating mode of cosmic expansion with increasing mass and decreasing temperature, current sub zero cosmic temperature of 2.7 K, very small value of the current Hubble parameter and observed very minor fluctuations in current cosmic temperature can be considered as favorable conditions for further analysis. Considering our proposed energy based definition of red shift, it seems compulsory to review the basics of Lambda cosmology. If one is willing to consider red shift as a measure of galactic distance, one can get a chance to study the observable universe in a new dimension accompanied by light speed rotation. As explained in section (5), equations (8) to (12) are having very strange origin and need a careful review at fundamental level. If it is an accidental coincidence, as the equations are strongly coupled with gravitational and cosmic physical constants, then one must think about the scope, applicability and validity of those equations in a different manner with reference to Dirac model of large numbers or quantum gravity or final unification. We are sure to say that, theory point of view, these equations are having good scientific background compared to dark energy like ambiguous entities. With a joint research associated with microscopic physics and cosmic physics, true nature of cosmic expansion can be understood. As there exists no strong experimental

evidence for the currently believed dark matter, until its detection, dark matter can be considered as a representation of super gravity of galactic baryon mass associated with its cut-off mass limit at (180 to 200) million solar masses.

Qualitatively and quantitatively, in a theoretical approach, compared to the historical arguments on cosmic rotation, our views seem to be more coherent, strongly connected with quantum gravity and are closer to observational findings. Hence, we sincerely appeal the science community to recommend our light speed rotating model of the Hubble-Hawking universe for further research.

### **Acknowledgements**

In preparing this paper, author Seshavatharam is greatly inspired by Dr. Mohsen Lutephy and Dr. Dimitar Todorov Valev for their thought provoking concepts on quantum cosmology associated with no further expansion. Seshavatharam is indebted to Professors Shri M. Nagaphani Sarma, Chairman; Shri K.V. Krishna Murthy, founder Chairman, Institute of Scientific Research in Vedas (I-SERVE), Hyderabad, India; and Shri K.V.R.S. Murthy, former scientist IICT (CSIR), Govt. of India, Director, Research and Development, I-SERVE, for their valuable guidance and support in developing this subject. Authors are very much thankful to the anonymous reviewers for their valuable suggestions in improving the quality of the paper.

**Appendix A: C++ program for estimating various galactic distances**

```
#include <conio.h>

#include <iostream.h>

#define c 299792.458

int main(){

float z=0.05;

do{

    z = z +1;

float H0 = 66.893;

// Hubble constant (km/s/Mpc) - adjust according to taste

float OM = 0.32; // Omega(matter) - adjust according to taste

float OL = 0.68; // Omega(lambda) - adjust according to taste

float OR = 0.42/(H0*H0);

// Omega(radiation) - this is the usual textbook value

long i;

long n=10000; // Number of steps in the integral

float OK = 1-OM-OR-OL; // Omega(k) defined as 1-OM-OR-OL

float HD = 3.2616*c/H0/1000; // Hubble distance (billions of light years).
See section 2 of Hogg
```

- 200 -

```
float a, adot;          // Redshift "z", Scale Factor "a", and its derivative "adot"

float DC, DCC=0, DT, DTT=0, DA, DL, DM;

float age, size;       // The age and size of the universe

for(i=n; i>=1; i--) {  // This loop is the numerical integration

    a = (i-0.5)/n;     // Steadily decrease the scale factor

    // Comoving formula

    (See section 4 of Hogg, but I've added a radiation term too):

    adot = a*sqrt(OM*pow(1/a,3)+OK*pow(1/a,2)+OL+OR*pow(1/a,4));

    // Note that "a" is equivalent to 1/(1+z)

    DCC = DCC + 1/(a*adot)/n; // Running total of the comoving distance

    DTT = DTT + 1/adot/n;

    // Running total of the light travel time (see section 10 of Hogg)

    if (a>=1/(1+z)) {  // Collect DC and DT until the correct scale is reached

        DC = DCC;     // Comoving distance DC

        DT = DTT;     // Light travel time DT

    }

}

// Transverse comoving distance DM from section 5 of Hogg:

if (OK>0.0001) DM=(1/sqrt(OK))*sinh(sqrt(OK)*DC);
```

```
else if (OK<-0.0001) DM=(1/sqrt(fabs(OK)))*sin(sqrt(fabs(OK))*DC);
else DM=DC;

age = HD*DTT;           // Age of the universe (billions of years)
size = HD*DCC;         // Comoving radius of the observable universe
DC = HD*DC;           // Comoving distance
A = HD*DM/(1+z);      // Angular diameter distance (section 6 of Hogg)
DL = HD*DM*(1+z);     // Luminosity distance (section 7 of Hogg)
DT = HD*DT;           // Light travel distance

float dt,zn,cd,ld;

zn=(z/(z+1));         // Modified red shift
dt=zn*HD;             // Estimated light travel distance
cd=exp(zn)*dt;        // Estimated comoving distance
ld=cd/(1-zn);         //Estimated luminosity distance

cout<<z<<","<<zn<<","<<DT<<","<<dt<<","
      <<((DT-dt)/DT)*100<<","<<DC<<","<<cd<<","
      <<((DC-cd)/DC)*100<<","<<DL<<","<<ld<<","<<((DL-
ld)/DL)*100<<endl;

} while (z<=1100.0);
}
```

## References

- [1] Cosmin Andreia, Anna Ijjasb and Paul J. Steinhardt. Rapidly descending dark energy and the end of cosmic expansion. *Proceedings of the National Academy of Sciences*, 119(15) e2200539119, 2022.
- [2] Perlmutter S et al. Measurements of  $\Omega$  and  $\Lambda$  from 42 High-Redshift Supernovae. *The Astrophysical Journal*, 517(2): 565, 1999.
- [3] Fulvio Melia (Arizona U. and Arizona U., Astron. Dept. - Steward Observ.). Fitting the Union2.1 SN Sample with the  $R_{h=ct}$  Universe. *Astron.J.* 144, 110, 2012.
- [4] Nielsen J.T, Guffanti A, Sarkar S. Marginal Evidence for Cosmic Acceleration from Type Ia Supernovae. *Nature, Scientific Reports* 6(Oct): 35596, 2016.
- [5] Lisa Goh Wan Khee. Thesis: Modified Statistical Analysis of Type Ia Supernovae Data. Supervisor. Supervisor: Shao Chin Cindy Ng, 2018-2019, National University of Singapore, Singapore.
- [6] Saadeh Daniela et al. How Isotropic is the Universe? *Phys. Rev. Lett.* 117:13, 131302, 2016.
- [7] Birch P. Is the Universe rotating? *Nature.* 298, 451-454, 1982.
- [8] C. Sivaram, Kenath Arun. Primordial Rotation of the Universe, Hydrodynamics, Vortices and Angular Momenta of Celestial Objects. *The Open Astronomy Journal*, 5, 7-11, 2012.
- [9] Vladimir A Korotky, Eduard Masár Yuri N Obukhov. In the Quest for Cosmic Rotation. *Universe*, 6:14, 2020.
- [10] Gianluca Calcagni et al. Lectures on classical and quantum cosmology. *PoS (CORFU2021)* 317, 2022.
- [11] Lopez-Corredoira M. Tests and Problems of the Standard Model in Cosmology. *Foundations of Physics*, 47, 711-768, 2017.
- [12] Di Valentino, E., Melchiorri, A. & Silk, J. Planck. Planck evidence for a closed Universe and a possible crisis for cosmology. *Nat Astron.* 4, 196–203, 2020.
- [13] George Ellis, Julien Larena. The case for a closed universe, *Astronomy & Geophysics*, 61(1), 1.38–1.40, 2020.
- [14] Will Handley. Curvature tension: evidence for a closed universe. *Phys. Rev. D* 103, 041301, 2021.
- [15] Hubble E.P. A Relation between Distance and Radial Velocity among Extra-Galactic Nebulae. *Proceedings of the National Academy of Sciences of the United States of America*, 15, 168-173, 1929.

- [16] Kurt Godel. Rotating Universes in General Relativity Theory. Proceedings of the international Congress of Mathematicians in Cambridge, 1: 175-81, 1950.
- [17] Wang, P. et al. Possible observational evidence for cosmic filament spin. Nat. Astron. 5, 839–845, 2021.
- [18] Seshavatharam U.V.S. Physics of Rotating and Expanding Black Hole Universe. Progress in Physics. 2 (April), 7-14, 2010.
- [19] Tatum E.T, Seshavatharam U.V.S, Lakshminarayana S. The basics of flat space cosmology. International Journal of Astronomy and Astrophysics, 5,116-124, 2015.
- [20] Seshavatharam U.V.S, Tatum E.T, Lakshminarayana S. The Large Scale Universe as a Quasi Quantum White Hole. International Astronomy and Astrophysics Research Journal. 3(1):22–42, 2021.
- [21] Seshavatharam U.V.S, Lakshminarayana S. Light speed expanding white hole universe having a red shift of  $[z/(1+z)]$ . World Scientific News, 162, 87-101, 2021.
- [22] Seshavatharam U.V.S, Lakshminarayana S. On the role of cosmic mass in understanding the relationships among galactic dark matter, visible matter and flat rotation speeds. NRIAG Journal of Astronomy and Geophysics. 10(1),1-15, 2021.
- [23] Seshavatharam U.V.S, Lakshminarayana S. Concepts and results of a Practical Model of Quantum Cosmology: Light Speed Expanding Black Hole Cosmology. Mapana Journal of Sciences. 21(2), 2022.
- [24] Seshavatharam U.V.S, Lakshminarayana S. Unified Quantum Gravity Pertaining to Nuclear and Cosmic Physics. Quantum Physics Letters. 11(2),23-30, 2022.
- [25] Seshavatharam U. V. S, Lakshminarayana S. Weak Interaction Dependent Super Gravity of Galactic Baryon Mass. Journal of Asian Scientific Research, 12(3), 146–155, 2022.

- [26] Seshavatharam U. V. S, Lakshminarayana S. Light Speed Expanding Hubble-Hawking Universe. Preprints 2022, 2022090279. <https://doi.org/10.20944/preprints202209.0279.v3>.
- [27] Seshavatharam U. V. S, Lakshminarayana S. A rotating model of light speed expanding Hubble-Hawking universe, in Proceedings of the 2nd Electronic Conference on Universe, 16 February–2 March 2023, MDPI: Basel, Switzerland, doi:10.3390/ECU2023-14065
- [28] Seshavatharam U. V. S, Lakshminarayana S. An open review on light speed expanding Hubble-Hawking universe.11(2): 322, 2023. (45 pages)
- [29] Hawking S. Black hole explosions? Nature 248, 30-31, 1974.
- [30] Planck Collaboration: Planck 2015 Results. XIII. Cosmological Parameters.
- [31] Jos'e Luis Bernal et al. Robustness of baryon acoustic oscillation constraints for early-Universe modifications to  $\Lambda$ CDM. Phys. Rev. D 102, 123515, 2020.
- [32] David Hogg. Distance Measures in Cosmology. arXiv:astro-ph/9905116, 2000.
- [33] Pacetti, S., Tomasi-Gustafsson, E. The origin of the proton radius puzzle. Eur. Phys. J. A 57, 72, 2021.
- [34] Milgrom M. A Modification of the Newtonian Dynamics as a Possible Alternative to the Hidden Mass Hypothesis. The Astrophysical Journal , 270, 365-370, 1983.
- [35] Banik I. and Zhao H. From Galactic Bars to the Hubble Tension: Weighing Up the Astrophysical Evidence for Milgromian Gravity. Symmetry, 14, 1331, 2022.
- [36] Brownstein J. R. and Moffat J. W. Galaxy Rotation Curves Without Non-Baryonic Dark Matter. The Astrophysical Journal , 636, 721-741, 2006.
- [37] Sivaram, C., Arun, K. & Rebecca, L. MOND, MONG, MORG as alternatives to dark matter and dark energy and consequences for cosmic structures. J. Astrophys. Astron. 41, 4, 2020
- [38] Kyu-Hyun Chae et al. Testing the Strong Equivalence Principle: Detection of the External Field Effect in Rotationally Supported Galaxies. The Astrophysical Journal, 904(1), 2020, 20(pp).
- [39] D. W. Sciama. On the Origin of Inertia. Monthly Notices of the Royal Astronomical Society, 13(1), 34-42, 1953.

- [40] Shen Z et al. A Tip of the Red Giant Branch Distance of  $22.1 \pm 1.2$  Mpc to the Dark Matter Deficient Galaxy NGC 1052–DF2 from 40 Orbits of Hubble Space Telescope Imaging. *The Astrophysical Journal Letters*. 914(1):L12, 2021.
- [41] Ogle, P.M., et al. A Break in Spiral Galaxy Scaling Relations at the Upper Limit of Galaxy Mass. *The Astrophysical Journal Letters*, 884, L11, 2019.
- [42] Gamow G. Rotating Universe? *Nature*. 158, 549, 1946.
- [43] E.T. Whittaker. Spin in the universe, *Yearbook of Roy. Soc. Edinburgh*, (1945) 5.
- [44] Hawking S. On the rotation of the Universe. *Monthly Notices of the Royal Astronomical Society*, 142, 129-141, 1969.
- [45] Godlowski, W. Global and Local Effects of Rotation: Observational Aspects. *International Journal of Modern Physics D*. 20, 1643, 2011.
- [46] João Magueijo et al. Cosmology with a spin. *Phys. Rev. D* 87, 063504, 2013.
- [47] Chechin L.M. Does the Cosmological Principle Exist in the Rotating Universe? *Gravitation and Cosmology*. 23(4): 305-310, 2017.
- [48] Longo M.J. Are Cosmic Isotropy Limits from Analyses of the Cosmic Microwave Background Credible? *Preprints 2020*, 2020110520
- [49] Shamir L. Asymmetry in Galaxy Spin Directions-Analysis of Data from DES and Comparison to Four Other Sky Surveys. *Universe*, 8, 397, 2022.
- [50] Nodland Borge and Ralston John P. Indication of Anisotropy in Electromagnetic Propagation over Cosmological Distances. *Phys. Rev. Lett.* 78(16), 3043-3046, 1997.
- [51] Pavan Kumar Aluri et al. Is the Observable Universe Consistent with the Cosmological Principle? *arXiv:2207.05765 [astro-ph.CO]* 2022
- [52] Seshavatharam U.V.S, Lakshminarayana S. Applications of Hubble Volume in Atomic Physics, Nuclear Physics, Particle Physics, Quantum Physics and Cosmic Physics. *J. Nucl. Phy. Mat. Sci. Rad. A*. 1(1), 45-60, 2013.
- [53] Seshavatharam U.V.S, Lakshminarayana S. Black hole Cosmos and the Micro Cosmos. *International Journal of Advanced Astronomy*. 1(2), 37-59, 2013.
- [54] Seshavatharam U.V.S, Lakshminarayana, S, Sai B.V.S.T. Is red shift an index of galactic 'atomic light emission' mechanism? *International Journal of Physics*, Vol. 1, No.3, 49-64, 2013.
- [55] Seshavatharam U.V.S and Lakshminarayana S. Cosmologically

- Strengthening Hydrogen Atom in Black Hole Universe. *J. Nucl. Phy. Mat. Sci. Rad. A.* Vol-3, No-2, 265–278, 2016.
- [56] U. V. S. Seshavatharam and S. Lakshminarayana. Is Planck's constant a cosmological variable? *International Journal of Astronomy*, 2(1): 11-15, 2013.
- [57] Seshavatharam, U.V.S., Lakshminarayana, S. Role of Four Gravitational Constants in Nuclear Structure. *Mapana-Journal of Sciences*.18,1,21, 2019.
- [58] Seshavatharam, U.V.S. Lakshminarayana, S. Implications and Applications of Electroweak Quantum Gravity. *International Astronomy and Astrophysics Research Journal*. 2(1),13-30, 2020.
- [59] Seshavatharam U.V.S and Lakshminarayana S. Is reduced Planck's constant - an outcome of electroweak gravity? *Mapana Journal of Sciences*. 19(1),1-13, 2020
- [60] Seshavatharam, U.V.S, Lakshminarayana S. 4G model of fitting RMS radius of proton. *Nucleus 2022: Fundamental problems and applications*. Moscow July 11–16, 2022. Book of abstracts, 88-89,2022. [https://events.sinp.msu.ru/event/8/contributions/613/attachments/594/1212/ID\\_25\\_24\\_uvssa\\_sln\\_14July2022.pdf](https://events.sinp.msu.ru/event/8/contributions/613/attachments/594/1212/ID_25_24_uvssa_sln_14July2022.pdf)
- [61] P.A. Zyla et al. (Particle Data Group), *Prog. Theor. Exp. Phys.* 2020, 083C01 (2021) and 2021 update.
- [62] Hawking, S.W., Hertog, T. A smooth exit from eternal inflation?. *J. High Energ. Phys.* 2018, 147, 2018.
- [63] Alis J Deason et al. The edge of the Galaxy. *Monthly Notices of the Royal Astronomical Society*. 496(3), 3929–3942, 2020.
- [64] Pijushpani Bhattacharjee et. al. (2014) Rotation Curve of the Milky Way out to  $\sim 200$  kpc. *ApJ* 785, 63. (13 pages)
